# Supplementary material
Source: publisher figshare collection journal article supplement (https://gsajournals.figshare.com/ndownloader/files/21866196)
Supplement: Supplementary file 1 [file 21866196]

**File S1. *FZP* sequences of 66 rice accessions**

>Balinono

TTCTTGTCATCTAATTGCAGGTTAGTTGTAAAATGTAAAATCGAATTGGACATTTTGAACCAGGTCATGGATTAATTGATTAAGATGCTAGAAGAAATTAACAAGCTGTGCCATGCAATATATCATGCATGCATGCATGAATATGATGGCTAAGTAGGTACTAATGCTAATATAGAAGAGAGAGAGAGAGAGAGAGAGAGAGAGAGAGAGAGAGAGAGATCATCTGCCTAAGTACATATTTGAAGAAGCTCTACTTAATTAACTAGAAATGGCGCCAAGCCACTCTTCTTGTTCGATCTACTGCTAGCTGCTGCTGCTGCTGCTGCTATACTACTCGATCTCTTGCTCGATCGATCAAACGCAGATTGATCAAGATCAACTCGATCTGATCATGGTAGACAGGAAATGATATATGCATGATCGCTCAGAGGCAAAGTGCGTGATTAGCCATGCAATGCCCGGTGCAACTCGATCAATGGGAGAGGAAGCTGAATGGAGAGTAGGAGTCGGAGCCCTGCGACGAGGCGACCATGTCGGCGGCGCCGCCGCTCGCCGGGAACCCGCAGGCGCCGAGCTGGTCCGCCGCGTCGCCGCCGCCCCAGAAGCCGGCGACCATCTGCGCGAGGTCGTCGACGTCCTCCCGGAGCCCCATCATGCCGTAGGCGTCGGCGTCGGAGTAGCGCCGCATGTCCTGATGATCGGCCGCGGCGCCGCCGCCCCTCGGCCGGAGGCAGCTCTCCGGCACCACGCTGCTCAGGTACCCGGAGTTGTCGTCGGCGCCGGAGAAGAGGAAGTCGTGGCCGTTCCTGTCCATGTCCAGCAGCGACGACGACATGCTGGAGCGGTGGGGATCAACCGGGACCATCACCGGCATCGTCGAGCACTCGCCCACCGACGACGCGCCCGACGCCGCGCCATGTCCGTGGTGGTGGTGGTGGTGGTGGTGGTGACCGTACGAGCCAATGTGCGGCGCCGCGCCCACGCCGCCGCCGTACTGCACCGAGGACGGCGCGGCGGCGGCAGCGGCGTACTGCGGCGCGTGGAACGGCGCGAGGAACGGCGGGTAGTTGTAGGCGGCGTGGGTGTAGACGAAGTTGGTGCGCGCCTGGGCGCCCTTCATGGACAGCGCGGCGCGGTCGTACGCCAGCGCCGCCTCCTGCGCCGTGTCGAACGTGCCCAGCCAGTGCCGCTCCTTGGTGGTCGGGTCGCGTATCTCGGCAGCGTACCTCCCCCACGGCCGCCGCCGCACGCCGAGGAACCTCCCTGGCTCCTGCGCGCGCCGCCTGCTGCGCCCCGACGGCGGCCGCTCGCTCATCGGCGACGACGGCGGCGACGGCTGGCTCGCCGGCTTCGGCGGCTCCGAGAACGCCATCAGGCTGGCCTGGCTGCTGCTGCTGCTGCTGCTACTGCCGCTGCCTCGAGTGTTCATGACCAATGCAATATTGCAATATTGCAATGCAATGCAAGAGTGAGAGTGAGAGTGAGCTAGGCTTTAGCTAAGCTAAGGTATATGAATGAGCTCGAGCTAAGCTTAGCTTGTGTGTAGTGCTCAAATGGGAGGGATTCAAGGGTGGTATTTAAATGGGTCTTGGAGAGAGAGGTCACTGTGGATGAGATGGCAGAGAGGGGTGGCATGCATGCACTGCACTTGTGTTAGCTAGACCTATAGCTGCATCATATCAAGGTTAGTTTGTAAGTATTCATCTTGTTTTCCAATGTGAGGTTTGGATTTGTGTGCCCTAATTTAACCTTAGGACCAGTAGAGGGGAATGTTGTGTGCTACTAATGTTTGTGTGTGAGTGTGTTGCTTCAAAATTAAGAATGGTTGGAA

>Taitung 30

TTCTTGTCATCTAATTGCAGGTTAGTTGTAAAATGTAAAATCGAATTGGACATTTTGAACCAGGTCATGGATTAATTGATTAAGATGCTAGAAGAAATTAACAAGCTGTGCCATGCAATATATCATGCATGCATGCATGAATATGATGGCTAAGTAGGTACTAATGCTAATATAGAAGAGAGAGAGAGAGAGAGAGAGAGAGAGAGAGAGAGAGAGAGATCATCTGCCTAAGTACATATTTGAAGAAGCTCTACTTAATTAACTAGAAATGGCGCCAAGCCACTCTTCTTGTTCGATCTACTGCTAGCTGCTGCTGCTGCTGCTGCTATACTACTCGATCTCTTGCTCGATCGATCAAACGCAGATTGATCAAGATCAACTCGATCTGATCATGGTAGACAGGAAATGATATATGCATGATCGCTCAGAGGCAAAGTGCGTGATTAGCCATGCAATGCCCGGTGCAACTCGATCAATGGGAGAGGAAGCTGAATGGAGAGTAGGAGTCGGAGCCCTGCGACGAGGCGACCATGTCGGCGGCGCCGCCGCTCGCCGGGAACCCGCAGGCGCCGAGCTGGTCCGCCGCGTCGCCGCCGCCCCAGAAGCCGGCGACCATCTGCGCGAGGTCGTCGACGTCCTCCCGGAGCCCCATCATGCCGTAGGCGTCGGCGTCGGAGTAGCGCCGCATGTCCTGATGATCGGCCGCGGCGCCGCCGCCCCTCGGCCGGAGGCAGCTCTCCGGCACCACGCTGCTCAGGTACCCGGAGTTGTCGTCGGCGCCGGAGAAGAGGAAGTCGTGGCCGTTCCTGTCCATGTCCAGCAGCGACGACGACATGCTGGAGCGGTGGGGATCAACCGGGACCATCACCGGCATCGTCGAGCACTCGCCCACCGACGACGCGCCCGACGCCGCGCCATGTCCGTGGTGGTGGTGGTGGTGGTGGTGGTGACCGTACGAGCCAATGTGCGGCGCCGCGCCCACGCCGCCGCCGTACTGCACCGAGGACGGCGCGGCGGCGGCAGCGGCGTACTGCGGCGCGTGGAACGGCGCGAGGAACGGCGGGTAGTTGTAGGCGGCGTGGGTGTAGACGAAGTTGGTGCGCGCCTGGGCGCCCTTCATGGACAGCGCGGCGCGGTCGTACGCCAGCGCCGCCTCCTGCGCCGTGTCGAACGTGCCCAGCCAGTGCCGCTCCTTGGTGGTCGGGTCGCGTATCTCGGCAGCGTACCTCCCCCACGGCCGCCGCCGCACGCCGAGGAACCTCCCTGGCTCCTGCGCGCGCCGCCTGCTGCGCCCCGACGGCGGCCGCTCGCTCATCGGCGACGACGGCGGCGACGGCTGGCTCGCCGGCTTCGGCGGCTCCGAGAACGCCATCAGGCTGGCCTGGCTGCTGCTGCTGCTGCTGCTACTGCCGCTGCCTCGAGTGTTCATGACCAATGCAATATTGCAATATTGCAATGCAATGCAAGAGTGAGAGTGAGAGTGAGCTAGGCTTTAGCTAAGCTAAGGTATATGAATGAGCTCGAGCTAAGCTTAGCTTGTGTGTAGTGCTCAAATGGGAGGGATTCAAGGGTGGTATTTAAATGGGTCTTGGAGAGAGAGGTCACTGTGGATGAGATGGCAGAGAGGGGTGGCATGCATGCACTGCACTTGTGTTAGCTAGACCTATAGCTGCATCATATCAAGGTTAGTTTGTAAGTATTCATCTTGTTTTCCAATGTGAGGTTTGGATTTGTGTGCCCTAATTTAACCTTAGGACCAGTAGAGGGGAATGTTGTGTGCTACTAATGTTTGTGTGTGAGTGTGTTGCTTCAAAATTAAGAATGGTTGGAA

>Taitung Nuo 31

TTCTTGTCATCTAATTGCAGGTTAGTTGTAAAATGTAAAATCGAATTGGACATTTTGAACCAGGTCATGGATTAATTGATTAAGATGCTAGAAGAAATTAACAAGCTGTGCCATGCAATATATCATGCATGCATGCATGAATATGATGGCTAAGTAGGTACTAATGCTAATATAGAAGAGAGAGAGAGAGAGAGAGAGAGAGAGAGAGAGAGAGAGAGATCATCTGCCTAAGTACATATTTGAAGAAGCTCTACTTAATTAACTAGAAATGGCGCCAAGCCACTCTTCTTGTTCGATCTACTGCTAGCTGCTGCTGCTGCTGCTGCTATACTACTCGATCTCTTGCTCGATCGATCAAACGCAGATTGATCAAGATCAACTCGATCTGATCATGGTAGACAGGAAATGATATATGCATGATCGCTCAGAGGCAAAGTGCGTGATTAGCCATGCAATGCCCGGTGCAACTCGATCAATGGGAGAGGAAGCTGAATGGAGAGTAGGAGTCGGAGCCCTGCGACGAGGCGACCATGTCGGCGGCGCCGCCGCTCGCCGGGAACCCGCAGGCGCCGAGCTGGTCCGCCGCGTCGCCGCCGCCCCAGAAGCCGGCGACCATCTGCGCGAGGTCGTCGACGTCCTCCCGGAGCCCCATCATGCCGTAGGCGTCGGCGTCGGAGTAGCGCCGCATGTCCTGATGATCGGCCGCGGCGCCGCCGCCCCTCGGCCGGAGGCAGCTCTCCGGCACCACGCTGCTCAGGTACCCGGAGTTGTCGTCGGCGCCGGAGAAGAGGAAGTCGTGGCCGTTCCTGTCCATGTCCAGCAGCGACGACGACATGCTGGAGCGGTGGGGATCAACCGGGACCATCACCGGCATCGTCGAGCACTCGCCCACCGACGACGCGCCCGACGCCGCGCCATGTCCGTGGTGGTGGTGGTGGTGGTGGTGGTGACCGTACGAGCCAATGTGCGGCGCCGCGCCCACGCCGCCGCCGTACTGCACCGAGGACGGCGCGGCGGCGGCAGCGGCGTACTGCGGCGCGTGGAACGGCGCGAGGAACGGCGGGTAGTTGTAGGCGGCGTGGGTGTAGACGAAGTTGGTGCGCGCCTGGGCGCCCTTCATGGACAGCGCGGCGCGGTCGTACGCCAGCGCCGCCTCCTGCGCCGTGTCGAACGTGCCCAGCCAGTGCCGCTCCTTGGTGGTCGGGTCGCGTATCTCGGCAGCGTACCTCCCCCACGGCCGCCGCCGCACGCCGAGGAACCTCCCTGGCTCCTGCGCGCGCCGCCTGCTGCGCCCCGACGGCGGCCGCTCGCTCATCGGCGACGACGGCGGCGACGGCTGGCTCGCCGGCTTCGGCGGCTCCGAGAACGCCATCAGGCTGGCCTGGCTGCTGCTGCTGCTGCTGCTACTGCCGCTGCCTCGAGTGTTCATGACCAATGCAATATTGCAATATTGCAATGCAATGCAAGAGTGAGAGTGAGAGTGAGCTAGGCTTTAGCTAAGCTAAGGTATATGAATGAGCTCGAGCTAAGCTTAGCTTGTGTGTAGTGCTCAAATGGGAGGGATTCAAGGGTGGTATTTAAATGGGTCTTGGAGAGAGAGGTCACTGTGGATGAGATGGCAGAGAGGGGTGGCATGCATGCACTGCACTTGTGTTAGCTAGACCTATAGCTGCATCATATCAAGGTTAGTTTGTAAGTATTCATCTTGTTTTCCAATGTGAGGTTTGGATTTGTGTGCCCTAATTTAACCTTAGGACCAGTAGAGGGGAATGTTGTGTGCTACTAATGTTTGTGTGTGAGTGTGTTGCTTCAAAATTAAGAATGGTTGGAA

>Taoyuan 3

TTCTTGTCATCTAATTGCAGGTTAGTTGTAAAATGTAAAATCGAATTGGACATTTTGAACCAGGTCATGGATTAATTGATTAAGATGCTAGAAGAAATTAACAAGCTGTGCCATGCAATATATCATGCATGCATGCATGAATATGATGGCTAAGTAGGTACTAATGCTAATATAGAAGAGAGAGAGAGAGAGAGAGAGAGAGAGAGAGAGAGAGAGAGATCATCTGCCTAAGTACATATTTGAAGAAGCTCTACTTAATTAACTAGAAATGGCGCCAAGCCACTCTTCTTGTTCGATCTACTGCTAGCTGCTGCTGCTGCTGCTGCTATACTACTCGATCTCTTGCTCGATCGATCAAACGCAGATTGATCAAGATCAACTCGATCTGATCATGGTAGACAGGAAATGATATATGCATGATCGCTCAGAGGCAAAGTGCGTGATTAGCCATGCAATGCCCGGTGCAACTCGATCAATGGGAGAGGAAGCTGAATGGAGAGTAGGAGTCGGAGCCCTGCGACGAGGCGACCATGTCGGCGGCGCCGCCGCTCGCCGGGAACCCGCAGGCGCCGAGCTGGTCCGCCGCGTCGCCGCCGCCCCAGAAGCCGGCGACCATCTGCGCGAGGTCGTCGACGTCCTCCCGGAGCCCCATCATGCCGTAGGCGTCGGCGTCGGAGTAGCGCCGCATGTCCTGATGATCGGCCGCGGCGCCGCCGCCCCTCGGCCGGAGGCAGCTCTCCGGCACCACGCTGCTCAGGTACCCGGAGTTGTCGTCGGCGCCGGAGAAGAGGAAGTCGTGGCCGTTCCTGTCCATGTCCAGCAGCGACGACGACATGCTGGAGCGGTGGGGATCAACCGGGACCATCACCGGCATCGTCGAGCACTCGCCCACCGACGACGCGCCCGACGCCGCGCCATGTCCGTGGTGGTGGTGGTGGTGGTGGTGGTGACCGTACGAGCCAATGTGCGGCGCCGCGCCCACGCCGCCGCCGTACTGCACCGAGGACGGCGCGGCGGCGGCAGCGGCGTACTGCGGCGCGTGGAACGGCGCGAGGAACGGCGGGTAGTTGTAGGCGGCGTGGGTGTAGACGAAGTTGGTGCGCGCCTGGGCGCCCTTCATGGACAGCGCGGCGCGGTCGTACGCCAGCGCCGCCTCCTGCGCCGTGTCGAACGTGCCCAGCCAGTGCCGCTCCTTGGTGGTCGGGTCGCGTATCTCGGCAGCGTACCTCCCCCACGGCCGCCGCCGCACGCCGAGGAACCTCCCTGGCTCCTGCGCGCGCCGCCTGCTGCGCCCCGACGGCGGCCGCTCGCTCATCGGCGACGACGGCGGCGACGGCTGGCTCGCCGGCTTCGGCGGCTCCGAGAACGCCATCAGGCTGGCCTGGCTGCTGCTGCTGCTGCTGCTACTGCCGCTGCCTCGAGTGTTCATGACCAATGCAATATTGCAATATTGCAATGCAATGCAAGAGTGAGAGTGAGAGTGAGCTAGGCTTTAGCTAAGCTAAGGTATATGAATGAGCTCGAGCTAAGCTTAGCTTGTGTGTAGTGCTCAAATGGGAGGGATTCAAGGGTGGTATTTAAATGGGTCTTGGAGAGAGAGGTCACTGTGGATGAGATGGCAGAGAGGGGTGGCATGCATGCACTGCACTTGTGTTAGCTAGACCTATAGCTGCATCATATCAAGGTTAGTTTGTAAGTATTCATCTTGTTTTCCAATGTGAGGTTTGGATTTGTGTGCCCTAATTTAACCTTAGGACCAGTAGAGGGGAATGTTGTGTGCTACTAATGTTTGTGTGTGAGTGTGTTGCTTCAAAATTAAGAATGGTTGGAA

>K-17080

TTCTTGTCATCTAATTGCAGGTTAGTTGTAAAATGTAAAATCGAATTGGACATTTTGAACCAGGTCATGGATTAATTGATTAAGATGCTAGAAGAAATTAACAAGCTGTGCCATGCAATATATCATGCATGCATGCATGAATATGATGGCTAAGTAGGTACTAATGCTAATATAGAAGAGAGAGAGAGAGAGAGAGAGAGAGAGAGAGAGAGAGAGATCATCTGCCTAAGTACATATTTGAAGAAGCTCTACTTAATTAACTAGAAATGGCGCCAAGCCACTCTTCTTGTTCGATCTACTGCTAGCTGCTGCTGCTGCTGCTGCTATACTACTCGATCTCTTGCTCGATCGATCAAACGCAGATTGATCAAGATCAACTCGATCTGATCATGGTAGACAGGAAATGATATATGCATGATCGCTCAGAGGCAAAGTGCGTGATTAGCCATGCAATGCCCGGTGCAACTCGATCAATGGGAGAGGAAGCTGAATGGAGAGTAGGAGTCGGAGCCCTGCGACGAGGCGACCATGTCGGCGGCGCCGCCGCTCGCCGGGAACCCGCAGGCGCCGAGCTGGTCCGCCGCGTCGCCGCCGCCCCAGAAGCCGGCGACCATCTGCGCGAGGTCGTCGACGTCCTCCCGGAGCCCCATCATGCCGTAGGCGTCGGCGTCGGAGTAGCGCCGCATGTCCTGATGATCGGCCGCGGCGCCGCCGCCCCTCGGCCGGAGGCAGCTCTCCGGCACCACGCTGCTCAGGTACCCGGAGTTGTCGTCGGCGCCGGAGAAGAGGAAGTCGTGGCCGTTCCTGTCCATGTCCAGCAGCGACGACGACATGCTGGAGCGGTGGGGATCAACCGGGACCATCACCGGCATCGTCGAGCACTCGCCCACCGACGACGCGCCCGACGCCGCGCCATGTCCGTGGTGGTGGTGGTGGTGGTGGTGGTGACCGTACGAGCCAATGTGCGGCGCCGCGCCCACGCCGCCGCCGTACTGCACCGAGGACGGCGCGGCGGCGGCAGCGGCGTACTGCGGCGCGTGGAACGGCGCGAGGAACGGCGGGTAGTTGTAGGCGGCGTGGGTGTAGACGAAGTTGGTGCGCGCCTGGGCGCCCTTCATGGACAGCGCGGCGCGGTCGTACGCCAGCGCCGCCTCCTGCGCCGTGTCGAACGTGCCCAGCCAGTGCCGCTCCTTGGTGGTCGGGTCGCGTATCTCGGCAGCGTACCTCCCCCACGGCCGCCGCCGCACGCCGAGGAACCTCCCTGGCTCCTGCGCGCGCCGCCTGCTGCGCCCCGACGGCGGCCGCTCGCTCATCGGCGACGACGGCGGCGACGGCTGGCTCGCCGGCTTCGGCGGCTCCGAGAACGCCATCAGGCTGGCCTGGCTGCTGCTGCTGCTGCTGCTACTGCCGCTGCCTCGAGTGTTCATGACCAATGCAATATTGCAATATTGCAATGCAATGCAAGAGTGAGAGTGAGAGTGAGCTAGGCTTTAGCTAAGCTAAGGTATATGAATGAGCTCGAGCTAAGCTTAGCTTGTGTGTAGTGCTCAAATGGGAGGGATTCAAGGGTGGTATTTAAATGGGTCTTGGAGAGAGAGGTCACTGTGGATGAGATGGCAGAGAGGGGTGGCATGCATGCACTGCACTTGTGTTAGCTAGACCTATAGCTGCATCATATCAAGGTTAGTTTGTAAGTATTCATCTTGTTTTCCAATGTGAGGTTTGGATTTGTGTGCCCTAATTTAACCTTAGGACCAGTAGAGGGGAATGTTGTGTGCTACTAATGTTTGTGTGTGAGTGTGTTGCTTCAAAATTAAGAATGGTTGGAA

>Amol 3 (Sona)

TTCTTGTCATCTAATTGCAGGTTAGTTGTAAAATGTAAAATCGAATTGGACATTTTGAACCAGGTCATGGATTAATTGATTAAGATGCTAGAAGAAATTAACAAGCTGTGCCATGCAATATATCATGCATGCATGCATGAATATGATGGCTAAGTAGGTACTAATGCTAATATAGAAGAGAGAGAGAGAGAGAGAGAGAGAGAGAGAGAGAGAGAGAGATCATCTGCCTAAGTACATATTTGAAGAAGCTCTACTTAATTAACTAGAAATGGCGCCAAGCCACTCTTCTTGTTCGATCTACTGCTAGCTGCTGCTGCTGCTGCTATACTACTCGATCTCTTGCTCGATCGATCAAACGCAGATTGATCAAGATCAACTCGATCTGATCATGGTAGACAGGAAATGATATATGCATGATCGCTCAGAGGCAAAGTGCGTGATTAGCCATGCAATGCCCGGTGCAACTCGATCAATGGGAGAGGAAGCTGAATGGAGAGTAGGAGTCGGAGCCCTGCGACGAGGCGACCATGTCGGCGGCGCCGCCGCTCGCCGGGAACCCGCAGGCGCCGAGCTGGTCCGCCGCGTCGCCGCCGCCCCAGAAGCCGGCGACCATCTGCGCGAGGTCGTCGACGTCCTCCCGGAGCCCCATCATGCCGTAGGCGTCGGCGTCGGAGTAGCGCCGCATGTCCTGATGATCGGCCGCGGCGCCGCCGCCCCTCGGCCGGAGGCAGCTCTCCGGCACCACGCTGCTCAGGTACCCGGAGTTGTCGTCGGCGCCGGAGAAGAGGAAGTCGTGGCCGTTCCTGTCCATGTCCAGCAGCGACGACGACATGCTGGAGCGGTGGGGATCAACCGGGACCATCACCGGCATCGTCGAGCACTCGCCCACCGACGACGCGCCCGACGCCGCGCCATGTCCGTGGTGGTGGTGGTGGTGGTGGTGGTGACCGTACGAGCCAATGTGCGGCGCCGCGCCCACGCCGCCGCCGTACTGCACCGAGGACGGCGCGGCGGCGGCAGCGGCGTACTGCGGCGCGTGGAACGGCGCGAGGAACGGCGGGTAGTTGTAGGCGGCGTGGGTGTAGACGAAGTTGGTGCGCGCCTGGGCGCCCTTCATGGACAGCGCGGCGCGGTCGTACGCCAGCGCCGCCTCCTGCGCCGTGTCGAACGTGCCCAGCCAGTGCCGCTCCTTGGTGGTCGGGTCGCGTATCTCGGCAGCGTACCTCCCCCACGGCCGCCGCCGCACGCCGAGGAACCTCCCTGGCTCCTGCGCGCGCCGCCTGCTGCGCCCCGACGGCGGCCGCTCGCTCATCGGCGACGACGGCGGCGACGGCTGGCTCGCCGGCTTCGGCGGCTCCGAGAACGCCATCAGGCTGGCCTGGCTGCTGCTGCTGCTGCTGCTACTGCCGCTGCCTCGAGTGTTCATGACCAATGCAATATTGCAATATTGCAATGCAATGCAAGAGTGAGAGTGAGAGTGAGCTAGGCTTTAGCTAAGCTAAGGTATATGAATGAGCTCGAGCTAAGCTTAGCTTGTGTGTAGTGCTCAAATGGGAGGGATTCAAGGGTGGTATTTAAATGGGTCTTGGAGAGAGAGGTCACTGTGGATGAGATGGCAGAGAGGGGTGGCATGCATGCACTGCACTTGTGTTAGCTAGACCTATAGCTGCATCATATCAAGGTTAGTTTGTAAGTATTCATCTTGTTTTCCAATGTGAGGTTTGGATTTGTGTGCCCTAATTTAACCTTAGGACCAGTAGAGGGGAATGTTGTGTGCTACTAATGTTTGTGTGTGAGTGTGTTGCTTCAAAATTAAGAATGGTTGGAA

>Kitakaori

TTCTTGTCATCTAATTGCAGGTTAGTTGTAAAATGTAAAATCGAATTGGACATTTTGAACCAGGTCATGGATTAATTGATTAAGATGCTAGAAGAAATTAACAAGCTGTGCCATGCAATATATCATGCATGCATGCATGAATATGATGGCTAAGTAGGTACTAATGCTAATATAGAAGAGAGAGAGAGAGAGAGAGAGAGAGAGAGAGAGAGAGAGAGATCATCTGCCTAAGTACATATTTGAAGAAGCTCTACTTAATTAACTAGAAATGGCGCCAAGCCACTCTTCTTGTTCGATCTACTGCTAGCTGCTGCTGCTGCTGCTGCTATACTACTCGATCTCTTGCTCGATCGATCAAACGCAGATTGATCAAGATCAACTCGATCTGATCATGGTAGACAGGAAATGATATATGCATGATCGCTCAGAGGCAAAGTGCGTGATTAGCCATGCAATGCCCGGTGCAACTCGATCAATGGGAGAGGAAGCTGAATGGAGAGTAGGAGTCGGAGCCCTGCGACGAGGCGACCATGTCGGCGGCGCCGCCGCTCGCCGGGAACCCGCAGGCGCCGAGCTGGTCCGCCGCGTCGCCGCCGCCCCAGAAGCCGGCGACCATCTGCGCGAGGTCGTCGACGTCCTCCCGGAGCCCCATCATGCCGTAGGCGTCGGCGTCGGAGTAGCGCCGCATGTCCTGATGATCGGCCGCGGCGCCGCCGCCCCTCGGCCGGAGGCAGCTCTCCGGCACCACGCTGCTCAGGTACCCGGAGTTGTCGTCGGCGCCGGAGAAGAGGAAGTCGTGGCCGTTCCTGTCCATGTCCAGCAGCGACGACGACATGCTGGAGCGGTGGGGATCAACCGGGACCATCACCGGCATCGTCGAGCACTCGCCCACCGACGACGCGCCCGACGCCGCGCCATGTCCGTGGTGGTGGTGGTGGTGGTGGTGGTGACCGTACGAGCCAATGTGCGGCGCCGCGCCCACGCCGCCGCCGTACTGCACCGAGGACGGCGCGGCGGCGGCAGCGGCGTACTGCGGCGCGTGGAACGGCGCGAGGAACGGCGGGTAGTTGTAGGCGGCGTGGGTGTAGACGAAGTTGGTGCGCGCCTGGGCGCCCTTCATGGACAGCGCGGCGCGGTCGTACGCCAGCGCCGCCTCCTGCGCCGTGTCGAACGTGCCCAGCCAGTGCCGCTCCTTGGTGGTCGGGTCGCGTATCTCGGCAGCGTACCTCCCCCACGGCCGCCGCCGCACGCCGAGGAACCTCCCTGGCTCCTGCGCGCGCCGCCTGCTGCGCCCCGACGGCGGCCGCTCGCTCATCGGCGACGACGGCGGCGACGGCTGGCTCGCCGGCTTCGGCGGCTCCGAGAACGCCATCAGGCTGGCCTGGCTGCTGCTGCTGCTGCTGCTACTGCCGCTGCCTCGAGTGTTCATGACCAATGCAATATTGCAATATTGCAATGCAATGCAAGAGTGAGAGTGAGAGTGAGCTAGGCTTTAGCTAAGCTAAGGTATATGAATGAGCTCGAGCTAAGCTTAGCTTGTGTGTAGTGCTCAAATGGGAGGGATTCAAGGGTGGTATTTAAATGGGTCTTGGAGAGAGAGGTCACTGTGGATGAGATGGCAGAGAGGGGTGGCATGCATGCACTGCACTTGTGTTAGCTAGACCTATAGCTGCATCATATCAAGGTTAGTTTGTAAGTATTCATCTTGTTTTCCAATGTGAGGTTTGGATTTGTGTGCCCTAATTTAACCTTAGGACCAGTAGAGGGGAATGTTGTGTGCTACTAATGTTTGTGTGTGAGTGTGTTGCTTCAAAATTAAGAATGGTTGGAA

>IR841-85

TTCTTGTCATCTAATTGCAGGTTAGTTGTAAAATGTAAAATCGAATTGGACATTTTGAACCAGGTCATGGATTAATTGATTAAGATGCTAGAAGAAATTAACAAGCTGTGCCATGCAATATATCATGCATGCATGCATGAATATGATGGCTAAGTAGGTACTAATGCTAATATAGAAGAGAGAGAGAGAGAGAGAGAGAGAGAGAGAGAGAGAGAGATCATCTGCCTAAGTACATATTTGAAGAAGCTCTACTTAATTAACTAGAAATGGCGCCAAGCCACTCTTCTTGTTCGATCTACTGCTAGCTGCTGCTGCTGCTGCTGCTATACTACTCGATCTCTTGCTCGATCGATCAAACGCAGATTGATCAAGATCAACTCGATCTGATCATGGTAGACAGGAAATGATATATGCATGATCGCTCAGAGGCAAAGTGCGTGATTAGCCATGCAATGCCCGGTGCAACTCGATCAATGGGAGAGGAAGCTGAATGGAGAGTAGGAGTCGGAGCCCTGCGACGAGGCGACCATGTCGGCGGCGCCGCCGCTCGCCGGGAACCCGCAGGCGCCGAGCTGGTCCGCCGCGTCGCCGCCGCCCCAGAAGCCGGCGACCATCTGCGCGAGGTCGTCGACGTCCTCCCGGAGCCCCATCATGCCGTAGGCGTCGGCGTCGGAGTAGCGCCGCATGTCCTGATGATCGGCCGCGGCGCCGCCGCCCCTCGGCCGGAGGCAGCTCTCCGGCACCACGCTGCTCAGGTACCCGGAGTTGTCGTCGGCGCCGGAGAAGAGGAAGTCGTGGCCGTTCCTGTCCATGTCCAGCAGCGACGACGACATGCTGGAGCGGTGGGGATCAACCGGGACCATCACCGGCATCGTCGAGCACTCGCCCACCGACGACGCGCCCGACGCCGCGCCATGTCCGTGGTGGTGGTGGTGGTGGTGGTGGTGACCGTACGAGCCAATGTGCGGCGCCGCGCCCACGCCGCCGCCGTACTGCACCGAGGACGGCGCGGCGGCGGCAGCGGCGTACTGCGGCGCGTGGAACGGCGCGAGGAACGGCGGGTAGTTGTAGGCGGCGTGGGTGTAGACGAAGTTGGTGCGCGCCTGGGCGCCCTTCATGGACAGCGCGGCGCGGTCGTACGCCAGCGCCGCCTCCTGCGCCGTGTCGAACGTGCCCAGCCAGTGCCGCTCCTTGGTGGTCGGGTCGCGTATCTCGGCAGCGTACCTCCCCCACGGCCGCCGCCGCACGCCGAGGAACCTCCCTGGCTCCTGCGCGCGCCGCCTGCTGCGCCCCGACGGCGGCCGCTCGCTCATCGGCGACGACGGCGGCGACGGCTGGCTCGCCGGCTTCGGCGGCTCCGAGAACGCCATCAGGCTGGCCTGGCTGCTGCTGCTGCTGCTGCTACTGCCGCTGCCTCGAGTGTTCATGACCAATGCAATATTGCAATATTGCAATGCAATGCAAGAGTGAGAGTGAGAGTGAGCTAGGCTTTAGCTAAGCTAAGGTATATGAATGAGCTCGAGCTAAGCTTAGCTTGTGTGTAGTGCTCAAATGGGAGGGATTCAAGGGTGGTATTTAAATGGGTCTTGGAGAGAGAGGTCACTGTGGATGAGATGGCAGAGAGGGGTGGCATGCATGCACTGCACTTGTGTTAGCTAGACCTATAGCTGCATCATATCAAGGTTAGTTTGTAAGTATTCATCTTGTTTTCCAATGTGAGGTTTGGATTTGTGTGCCCTAATTTAACCTTAGGACCAGTAGAGGGGAATGTTGTGTGCTACTAATGTTTGTGTGTGAGTGTGTTGCTTCAAAATTAAGAATGGTTGGAA

>BASMATI 370A

TTCTTGTCATCTAATTGCAGGTTAGTTGTAAAATGTAAAATCGAATTGGACATTTTGAACCAGGTCATGGATTAATTGATTAAGATGCTAGAAGAAATTAACAAGCTGTGCCATGCAATATATCATGCATGCATGCATGAATATGATGGCTAAGTAGGTACTAATGCTAATATAGAAGAGAGAGAGAGAGAGAGAGAGAGAGAGAGAGAGAGAGAGATCATCTGCCTAAGTACATATTTGAAGAAGCTCTACTTAATTAACTAGAAATGGCGCCAAGCCACTCTTCTTGTTCGATCTACTGCTAGCTGCTGCTGCTGCTGCTGCTATACTACTCGATCTCTTGCTCGATCGATCAAACGCAGATTGATCAAGATCAACTCGATCTGATCATGGTAGACAGGAAATGATATATGCATGATCGCTCAGAGGCAAAGTGCGTGATTAGCCATGCAATGCCCGGTGCAACTCGATCAATGGGAGAGGAAGCTGAATGGAGAGTAGGAGTCGGAGCCCTGCGACGAGGCGACCATGTCGGCGGCGCCGCCGCTCGCCGGGAACCCGCAGGCGCCGAGCTGGTCCGCCGCGTCGCCGCCGCCCCAGAAGCCGGCGACCATCTGCGCGAGGTCGTCGACGTCCTCCCGGAGCCCCATCATGCCGTAGGCGTCGGCGTCGGAGTAGCGCCGCATGTCCTGATGATCGGCCGCGGCGCCGCCGCCCCTCGGCCGGAGGCAGCTCTCCGGCACCACGCTGCTCAGGTACCCGGAGTTGTCGTCGGCGCCGGAGAAGAGGAAGTCGTGGCCGTTCCTGTCCATGTCCAGCAGCGACGACGACATGCTGGAGCGGTGGGGATCAACCGGGACCATCACCGGCATCGTCGAGCACTCGCCCACCGACGACGCGCCCGACGCCGCGCCATGTCCGTGGTGGTGGTGGTGGTGGTGGTGGTGACCGTACGAGCCAATGTGCGGCGCCGCGCCCACGCCGCCGCCGTACTGCACCGAGGACGGCGCGGCGGCGGCAGCGGCGTACTGCGGCGCGTGGAACGGCGCGAGGAACGGCGGGTAGTTGTAGGCGGCGTGGGTGTAGACGAAGTTGGTGCGCGCCTGGGCGCCCTTCATGGACAGCGCGGCGCGGTCGTACGCCAGCGCCGCCTCCTGCGCCGTGTCGAACGTGCCCAGCCAGTGCCGCTCCTTGGTGGTCGGGTCGCGTATCTCGGCAGCGTACCTCCCCCACGGCCGCCGCCGCACGCCGAGGAACCTCCCTGGCTCCTGCGCGCGCCGCCTGCTGCGCCCCGACGGCGGCCGCTCGCTCATCGGCGACGACGGCGGCGACGGCTGGCTCGCCGGCTTCGGCGGCTCCGAGAACGCCATCAGGCTGGCCTGGCTGCTGCTGCTGCTGCTGCTACTGCCGCTGCCTCGAGTGTTCATGACCAATGCAATATTGCAATATTGCAATGCAATGCAAGAGTGAGAGTGAGAGTGAGCTAGGCTTTAGCTAAGCTAAGGTATATGAATGAGCTCGAGCTAAGCTTAGCTTGTGTGTAGTGCTCAAATGGGAGGGATTCAAGGGTGGTATTTAAATGGGTCTTGGAGAGAGAGGTCACTGTGGATGAGATGGCAGAGAGGGGTGGCATGCATGCACTGCACTTGTGTTAGCTAGACCTATAGCTGCATCATATCAAGGTTAGTTTGTAAGTATTCATCTTGTTTTCCAATGTGAGGTTTGGATTTGTGTGCCCTAATTTAACCTTAGGACCAGTAGAGGGGAATGTTGTGTGCTACTAATGTTTGTGTGTGAGTGTGTTGCTTCAAAATTAAGAATGGTTGGAA

>Taichung194

TTCTTGTCATCTAATTGCAGGTTAGTTGTAAAATGTAAAATCGAATTGGACATTTTGAACCAGGTCATGGATTAATTGATTAAGATGCTAGAAGAAATTAACAAGCTGTGCCATGCAATATATCATGCATGCATGCATGAATATGATGGCTAAGTAGGTACTAATGCTAATATAGAAGAGAGAGAGAGAGAGAGAGAGAGAGAGAGAGAGAGAGAGATCATCTGCCTAAGTACATATTTGAAGAAGCTCTACTTAATTAACTAGAAATGGCGCCAAGCCACTCTTCTTGTTCGATCTACTGCTAGCTGCTGCTGCTGCTGCTGCTATACTACTCGATCTCTTGCTCGATCGATCAAACGCAGATTGATCAAGATCAACTCGATCTGATCATGGTAGACAGGAAATGATATATGCATGATCGCTCAGAGGCAAAGTGCGTGATTAGCCATGCAATGCCCGGTGCAACTCGATCAATGGGAGAGGAAGCTGAATGGAGAGTAGGAGTCGGAGCCCTGCGACGAGGCGACCATGTCGGCGGCGCCGCCGCTCGCCGGGAACCCGCAGGCGCCGAGCTGGTCCGCCGCGTCGCCGCCGCCCCAGAAGCCGGCGACCATCTGCGCGAGGTCGTCGACGTCCTCCCGGAGCCCCATCATGCCGTAGGCGTCGGCGTCGGAGTAGCGCCGCATGTCCTGATGATCGGCCGCGGCGCCGCCGCCCCTCGGCCGGAGGCAGCTCTCCGGCACCACGCTGCTCAGGTACCCGGAGTTGTCGTCGGCGCCGGAGAAGAGGAAGTCGTGGCCGTTCCTGTCCATGTCCAGCAGCGACGACGACATGCTGGAGCGGTGGGGATCAACCGGGACCATCACCGGCATCGTCGAGCACTCGCCCACCGACGACGCGCCCGACGCCGCGCCATGTCCGTGGTGGTGGTGGTGGTGGTGGTGGTGACCGTACGAGCCAATGTGCGGCGCCGCGCCCACGCCGCCGCCGTACTGCACCGAGGACGGCGCGGCGGCGGCAGCGGCGTACTGCGGCGCGTGGAACGGCGCGAGGAACGGCGGGTAGTTGTAGGCGGCGTGGGTGTAGACGAAGTTGGTGCGCGCCTGGGCGCCCTTCATGGACAGCGCGGCGCGGTCGTACGCCAGCGCCGCCTCCTGCGCCGTGTCGAACGTGCCCAGCCAGTGCCGCTCCTTGGTGGTCGGGTCGCGTATCTCGGCAGCGTACCTCCCCCACGGCCGCCGCCGCACGCCGAGGAACCTCCCTGGCTCCTGCGCGCGCCGCCTGCTGCGCCCCGACGGCGGCCGCTCGCTCATCGGCGACGACGGCGGCGACGGCTGGCTCGCCGGCTTCGGCGGCTCCGAGAACGCCATCAGGCTGGCCTGGCTGCTGCTGCTGCTGCTGCTACTGCCGCTGCCTCGAGTGTTCATGACCAATGCAATATTGCAATATTGCAATGCAATGCAAGAGTGAGAGTGAGAGTGAGCTAGGCTTTAGCTAAGCTAAGGTATATGAATGAGCTCGAGCTAAGCTTAGCTTGTGTGTAGTGCTCAAATGGGAGGGATTCAAGGGTGGTATTTAAATGGGTCTTGGAGAGAGAGGTCACTGTGGATGAGATGGCAGAGAGGGGTGGCATGCATGCACTGCACTTGTGTTAGCTAGACCTATAGCTGCATCATATCAAGGTTAGTTTGTAAGTATTCATCTTGTTTTCCAATGTGAGGTTTGGATTTGTGTGCCCTAATTTAACCTTAGGACCAGTAGAGGGGAATGTTGTGTGCTACTAATGTTTGTGTGTGAGTGTGTTGCTTCAAAATTAAGAATGGTTGGAA

>IR 65600-27-1-2-1

TTCTTGTCATCTAATTGCAGGTTAGTTGTAAAATGTAAAATCGAATTGGACATTTTGAACCAGGTCATGGATTAATTGATTAAGATGCTAGAAGAAATTAACAAGCTGTGCCATGCAATATATCATGCATGCATGCATGAATATGATGGCTAAGTAGGTACTAATGCTAATATAGAAGAGAGAGAGAGAGAGAGAGAGAGAGAGAGAGAGAGAGAGATCATCTGCCTAAGTACATATTTGAAGAAGCTCTACTTAATTAACTAGAAATGGCGCCAAGCCACTCTTCTTGTTCGATCTACTGCTAGCTGCTGCTGCTGCTGCTGCTATACTACTCGATCTCTTGCTCGATCGATCAAACGCAGATTGATCAAGATCAACTCGATCTGATCATGGTAGACAGGAAATGATATATGCATGATCGCTCAGAGGCAAAGTGCGTGATTAGCCATGCAATGCCCGGTGCAACTCGATCAATGGGAGAGGAAGCTGAATGGAGAGTAGGAGTCGGAGCCCTGCGACGAGGCGACCATGTCGGCGGCGCCGCCGCTCGCCGGGAACCCGCAGGCGCCGAGCTGGTCCGCCGCGTCGCCGCCGCCCCAGAAGCCGGCGACCATCTGCGCGAGGTCGTCGACGTCCTCCCGGAGCCCCATCATGCCGTAGGCGTCGGCGTCGGAGTAGCGCCGCATGTCCTGATGATCGGCCGCGGCGCCGCCGCCCCTCGGCCGGAGGCAGCTCTCCGGCACCACGCTGCTCAGGTACCCGGAGTTGTCGTCGGCGCCGGAGAAGAGGAAGTCGTGGCCGTTCCTGTCCATGTCCAGCAGCGACGACGACATGCTGGAGCGGTGGGGATCAACCGGGACCATCACCGGCATCGTCGAGCACTCGCCCACCGACGACGCGCCCGACGCCGCGCCATGTCCGTGGTGGTGGTGGTGGTGGTGGTGGTGACCGTACGAGCCAATGTGCGGCGCCGCGCCCACGCCGCCGCCGTACTGCACCGAGGACGGCGCGGCGGCGGCAGCGGCGTACTGCGGCGCGTGGAACGGCGCGAGGAACGGCGGGTAGTTGTAGGCGGCGTGGGTGTAGACGAAGTTGGTGCGCGCCTGGGCGCCCTTCATGGACAGCGCGGCGCGGTCGTACGCCAGCGCCGCCTCCTGCGCCGTGTCGAACGTGCCCAGCCAGTGCCGCTCCTTGGTGGTCGGGTCGCGTATCTCGGCAGCGTACCTCCCCCACGGCCGCCGCCGCACGCCGAGGAACCTCCCTGGCTCCTGCGCGCGCCGCCTGCTGCGCCCCGACGGCGGCCGCTCGCTCATCGGCGACGACGGCGGCGACGGCTGGCTCGCCGGCTTCGGCGGCTCCGAGAACGCCATCAGGCTGGCCTGGCTGCTGCTGCTGCTGCTGCTACTGCCGCTGCCTCGAGTGTTCATGACCAATGCAATATTGCAATATTGCAATGCAATGCAAGAGTGAGAGTGAGAGTGAGCTAGGCTTTAGCTAAGCTAAGGTATATGAATGAGCTCGAGCTAAGCTTAGCTTGTGTGTAGTGCTCAAATGGGAGGGATTCAAGGGTGGTATTTAAATGGGTCTTGGAGAGAGAGGTCACTGTGGATGAGATGGCAGAGAGGGGTGGCATGCATGCACTGCACTTGTGTTAGCTAGACCTATAGCTGCATCATATCAAGGTTAGTTTGTAAGTATTCATCTTGTTTTCCAATGTGAGGTTTGGATTTGTGTGCCCTAATTTAACCTTAGGACCAGTAGAGGGGAATGTTGTGTGCTACTAATGTTTGTGTGTGAGTGTGTTGCTTCAAAATTAAGAATGGTTGGAA

>IR 66159-189-5-5-3

TTCTTGTCATCTAATTGCAGGTTAGTTGTAAAATGTAAAATCGAATTGGACATTTTGAACCAGGTCATGGATTAATTGATTAAGATGCTAGAAGAAATTAACAAGCTGTGCCATGCAATATATCATGCATGCATGCATGAATATGATGGCTAAGTAGGTACTAATGCTAATATAGAAGAGAGAGAGAGAGAGAGAGAGAGAGAGAGAGAGAGAGAGATCATCTGCCTAAGTACATATTTGAAGAAGCTCTACTTAATTAACTAGAAATGGCGCCAAGCCACTCTTCTTGTTCGATCTACTGCTAGCTGCTGCTGCTGCTGCTGCTATACTACTCGATCTCTTGCTCGATCGATCAAACGCAGATTGATCAAGATCAACTCGATCTGATCATGGTAGACAGGAAATGATATATGCATGATCGCTCAGAGGCAAAGTGCGTGATTAGCCATGCAATGCCCGGTGCAACTCGATCAATGGGAGAGGAAGCTGAATGGAGAGTAGGAGTCGGAGCCCTGCGACGAGGCGACCATGTCGGCGGCGCCGCCGCTCGCCGGGAACCCGCAGGCGCCGAGCTGGTCCGCCGCGTCGCCGCCGCCCCAGAAGCCGGCGACCATCTGCGCGAGGTCGTCGACGTCCTCCCGGAGCCCCATCATGCCGTAGGCGTCGGCGTCGGAGTAGCGCCGCATGTCCTGATGATCGGCCGCGGCGCCGCCGCCCCTCGGCCGGAGGCAGCTCTCCGGCACCACGCTGCTCAGGTACCCGGAGTTGTCGTCGGCGCCGGAGAAGAGGAAGTCGTGGCCGTTCCTGTCCATGTCCAGCAGCGACGACGACATGCTGGAGCGGTGGGGATCAACCGGGACCATCACCGGCATCGTCGAGCACTCGCCCACCGACGACGCGCCCGACGCCGCGCCATGTCCGTGGTGGTGGTGGTGGTGGTGGTGGTGACCGTACGAGCCAATGTGCGGCGCCGCGCCCACGCCGCCGCCGTACTGCACCGAGGACGGCGCGGCGGCGGCAGCGGCGTACTGCGGCGCGTGGAACGGCGCGAGGAACGGCGGGTAGTTGTAGGCGGCGTGGGTGTAGACGAAGTTGGTGCGCGCCTGGGCGCCCTTCATGGACAGCGCGGCGCGGTCGTACGCCAGCGCCGCCTCCTGCGCCGTGTCGAACGTGCCCAGCCAGTGCCGCTCCTTGGTGGTCGGGTCGCGTATCTCGGCAGCGTACCTCCCCCACGGCCGCCGCCGCACGCCGAGGAACCTCCCTGGCTCCTGCGCGCGCCGCCTGCTGCGCCCCGACGGCGGCCGCTCGCTCATCGGCGACGACGGCGGCGACGGCTGGCTCGCCGGCTTCGGCGGCTCCGAGAACGCCATCAGGCTGGCCTGGCTGCTGCTGCTGCTGCTGCTACTGCCGCTGCCTCGAGTGTTCATGACCAATGCAATATTGCAATATTGCAATGCAATGCAAGAGTGAGAGTGAGAGTGAGCTAGGCTTTAGCTAAGCTAAGGTATATGAATGAGCTCGAGCTAAGCTTAGCTTGTGTGTAGTGCTCAAATGGGAGGGATTCAAGGGTGGTATTTAAATGGGTCTTGGAGAGAGAGGTCACTGTGGATGAGATGGCAGAGAGGGGTGGCATGCATGCACTGCACTTGTGTTAGCTAGACCTATAGCTGCATCATATCAAGGTTAGTTTGTAAGTATTCATCTTGTTTTCCAATGTGAGGTTTGGATTTGTGTGCCCTAATTTAACCTTAGGACCAGTAGAGGGGAATGTTGTGTGCTACTAATGTTTGTGTGTGAGTGTGTTGCTTCAAAATTAAGAATGGTTGGAA

>Basmati T3

TTCTTGTCATCTAATTGCAGGTTAGTTGTAAAATGTAAAATCGAATTGGACATTTTGAACCAGGTCATGGATTAATTGATTAAGATGCTAGAAGAAATTAACAAGCTGTGCCATGCAATATATCATGCATGCATGCATGAATATGATGGCTAAGTAGGTACTAATGCTAATATAGAAGAGAGAGAGAGAGAGAGAGAGAGAGAGAGAGAGAGAGAGATCATCTGCCTAAGTACATATTTGAAGAAGCTCTACTTAATTAACTAGAAATGGCGCCAAGCCACTCTTCTTGTTCGATCTACTGCTAGCTGCTGCTGCTGCTGCTGCTATACTACTCGATCTCTTGCTCGATCGATCAAACGCAGATTGATCAAGATCAACTCGATCTGATCATGGTAGACAGGAAATGATATATGCATGATCGCTCAGAGGCAAAGTGCGTGATTAGCCATGCAATGCCCGGTGCAACTCGATCAATGGGAGAGGAAGCTGAATGGAGAGTAGGAGTCGGAGCCCTGCGACGAGGCGACCATGTCGGCGGCGCCGCCGCTCGCCGGGAACCCGCAGGCGCCGAGCTGGTCCGCCGCGTCGCCGCCGCCCCAGAAGCCGGCGACCATCTGCGCGAGGTCGTCGACGTCCTCCCGGAGCCCCATCATGCCGTAGGCGTCGGCGTCGGAGTAGCGCCGCATGTCCTGATGATCGGCCGCGGCGCCGCCGCCCCTCGGCCGGAGGCAGCTCTCCGGCACCACGCTGCTCAGGTACCCGGAGTTGTCGTCGGCGCCGGAGAAGAGGAAGTCGTGGCCGTTCCTGTCCATGTCCAGCAGCGACGACGACATGCTGGAGCGGTGGGGATCAACCGGGACCATCACCGGCATCGTCGAGCACTCGCCCACCGACGACGCGCCCGACGCCGCGCCATGTCCGTGGTGGTGGTGGTGGTGGTGGTGGTGACCGTACGAGCCAATGTGCGGCGCCGCGCCCACGCCGCCGCCGTACTGCACCGAGGACGGCGCGGCGGCGGCAGCGGCGTACTGCGGCGCGTGGAACGGCGCGAGGAACGGCGGGTAGTTGTAGGCGGCGTGGGTGTAGACGAAGTTGGTGCGCGCCTGGGCGCCCTTCATGGACAGCGCGGCGCGGTCGTACGCCAGCGCCGCCTCCTGCGCCGTGTCGAACGTGCCCAGCCAGTGCCGCTCCTTGGTGGTCGGGTCGCGTATCTCGGCAGCGTACCTCCCCCACGGCCGCCGCCGCACGCCGAGGAACCTCCCTGGCTCCTGCGCGCGCCGCCTGCTGCGCCCCGACGGCGGCCGCTCGCTCATCGGCGACGACGGCGGCGACGGCTGGCTCGCCGGCTTCGGCGGCTCCGAGAACGCCATCAGGCTGGCCTGGCTGCTGCTGCTGCTGCTGCTACTGCCGCTGCCTCGAGTGTTCATGACCAATGCAATATTGCAATATTGCAATGCAATGCAAGAGTGAGAGTGAGAGTGAGCTAGGCTTTAGCTAAGCTAAGGTATATGAATGAGCTCGAGCTAAGCTTAGCTTGTGTGTAGTGCTCAAATGGGAGGGATTCAAGGGTGGTATTTAAATGGGTCTTGGAGAGAGAGGTCACTGTGGATGAGATGGCAGAGAGGGGTGGCATGCATGCACTGCACTTGTGTTAGCTAGACCTATAGCTGCATCATATCAAGGTTAGTTTGTAAGTATTCATCTTGTTTTCCAATGTGAGGTTTGGATTTGTGTGCCCTAATTTAACCTTAGGACCAGTAGAGGGGAATGTTGTGTGCTACTAATGTTTGTGTGTGAGTGTGTTGCTTCAAAATTAAGAATGGTTGGAA

>Ku 79-1

TTCTTGTCATCTAATTGCAGGTTAGTTGTAAAATGTAAAATCGAATTGGACATTTTGAACCAGGTCATGGATTAATTGATTAAGATGCTAGAAGAAATTAACAAGCTGTGCCATGCAATATATCATGCATGCATGCATGAATATGATGGCTAAGTAGGTACTAATGCTAATATAGAAGAGAGAGAGAGAGAGAGAGAGAGAGAGAGAGAGAGAGAGATCATCTGCCTAAGTACATATTTGAAGAAGCTCTACTTAATTAACTAGAAATGGCGCCAAGCCACTCTTCTTGTTCGATCTACTGCTAGCTGCTGCTGCTGCTGCTGCTATACTACTCGATCTCTTGCTCGATCGATCAAACGCAGATTGATCAAGATCAACTCGATCTGATCATGGTAGACAGGAAATGATATATGCATGATCGCTCAGAGGCAAAGTGCGTGATTAGCCATGCAATGCCCGGTGCAACTCGATCAATGGGAGAGGAAGCTGAATGGAGAGTAGGAGTCGGAGCCCTGCGACGAGGCGACCATGTCGGCGGCGCCGCCGCTCGCCGGGAACCCGCAGGCGCCGAGCTGGTCCGCCGCGTCGCCGCCGCCCCAGAAGCCGGCGACCATCTGCGCGAGGTCGTCGACGTCCTCCCGGAGCCCCATCATGCCGTAGGCGTCGGCGTCGGAGTAGCGCCGCATGTCCTGATGATCGGCCGCGGCGCCGCCGCCCCTCGGCCGGAGGCAGCTCTCCGGCACCACGCTGCTCAGGTACCCGGAGTTGTCGTCGGCGCCGGAGAAGAGGAAGTCGTGGCCGTTCCTGTCCATGTCCAGCAGCGACGACGACATGCTGGAGCGGTGGGGATCAACCGGGACCATCACCGGCATCGTCGAGCACTCGCCCACCGACGACGCGCCCGACGCCGCGCCATGTCCGTGGTGGTGGTGGTGGTGGTGGTGGTGACCGTACGAGCCAATGTGCGGCGCCGCGCCCACGCCGCCGCCGTACTGCACCGAGGACGGCGCGGCGGCGGCAGCGGCGTACTGCGGCGCGTGGAACGGCGCGAGGAACGGCGGGTAGTTGTAGGCGGCGTGGGTGTAGACGAAGTTGGTGCGCGCCTGGGCGCCCTTCATGGACAGCGCGGCGCGGTCGTACGCCAGCGCCGCCTCCTGCGCCGTGTCGAACGTGCCCAGCCAGTGCCGCTCCTTGGTGGTCGGGTCGCGTATCTCGGCAGCGTACCTCCCCCACGGCCGCCGCCGCACGCCGAGGAACCTCCCTGGCTCCTGCGCGCGCCGCCTGCTGCGCCCCGACGGCGGCCGCTCGCTCATCGGCGACGACGGCGGCGACGGCTGGCTCGCCGGCTTCGGCGGCTCCGAGAACGCCATCAGGCTGGCCTGGCTGCTGCTGCTGCTGCTGCTACTGCCGCTGCCTCGAGTGTTCATGACCAATGCAATATTGCAATATTGCAATGCAATGCAAGAGTGAGAGTGAGAGTGAGCTAGGCTTTAGCTAAGCTAAGGTATATGAATGAGCTCGAGCTAAGCTTAGCTTGTGTGTAGTGCTCAAATGGGAGGGATTCAAGGGTGGTATTTAAATGGGTCTTGGAGAGAGAGGTCACTGTGGATGAGATGGCAGAGAGGGGTGGCATGCATGCACTGCACTTGTGTTAGCTAGACCTATAGCTGCATCATATCAAGGTTAGTTTGTAAGTATTCATCTTGTTTTCCAATGTGAGGTTTGGATTTGTGTGCCCTAATTTAACCTTAGGACCAGTAGAGGGGAATGTTGTGTGCTACTAATGTTTGTGTGTGAGTGTGTTGCTTCAAAATTAAGAATGGTTGGAA

>Pokhareli

TTCTTGTCATCTAATTGCAGGTTAGTTGTAAAATGTAAAATCGAATTGGACATTTTGAACCAGGTCATGGATTAATTGATTAAGATGCTAGAAGAAATTAACAAGCTGTGCCATGCAATATATCATGCATGCATGCATGAATATGATGGCTAAGTAGGTACTAATGCTAATATAGAAGAGAGAGAGAGAGAGAGAGAGAGAGAGAGAGAGAGAGAGAGATCATCTGCCTAAGTACATATTTGAAGAAGCTCTACTTAATTAACTAGAAATGGCGCCAAGCCACTCTTCTTGTTCGATCTACTGCTAGCTGCTGCTGCTGCTGCTATACTACTCGATCTCTTGCTCGATCGATCAAACGCAGATTGATCAAGATCAACTCGATCTGATCATGGTAGACAGGAAATGATATATGCATGATCGCTCAGAGGCAAAGTGCGTGATTAGCCATGCAATGCCCGGTGCAACTCGATCAATGGGAGAGGAAGCTGAATGGAGAGTAGGAGTCGGAGCCCTGCGACGAGGCGACCATGTCGGCGGCGCCGCCGCTCGCCGGGAACCCGCAGGCGCCGAGCTGGTCCGCCGCGTCGCCGCCGCCCCAGAAGCCGGCGACCATCTGCGCGAGGTCGTCGACGTCCTCCCGGAGCCCCATCATGCCGTAGGCGTCGGCGTCGGAGTAGCGCCGCATGTCCTGATGATCGGCCGCGGCGCCGCCGCCCCTCGGCCGGAGGCAGCTCTCCGGCACCACGCTGCTCAGGTACCCGGAGTTGTCGTCGGCGCCGGAGAAGAGGAAGTCGTGGCCGTTCCTGTCCATGTCCAGCAGCGACGACGACATGCTGGAGCGGTGGGGATCAACCGGGACCATCACCGGCATCGTCGAGCACTCGCCCACCGACGACGCGCCCGACGCCGCGCCATGTCCGTGGTGGTGGTGGTGGTGGTGGTGGTGACCGTACGAGCCAATGTGCGGCGCCGCGCCCACGCCGCCGCCGTACTGCACCGAGGACGGCGCGGCGGCGGCAGCGGCGTACTGCGGCGCGTGGAACGGCGCGAGGAACGGCGGGTAGTTGTAGGCGGCGTGGGTGTAGACGAAGTTGGTGCGCGCCTGGGCGCCCTTCATGGACAGCGCGGCGCGGTCGTACGCCAGCGCCGCCTCCTGCGCCGTGTCGAACGTGCCCAGCCAGTGCCGCTCCTTGGTGGTCGGGTCGCGTATCTCGGCAGCGTACCTCCCCCACGGCCGCCGCCGCACGCCGAGGAACCTCCCTGGCTCCTGCGCGCGCCGCCTGCTGCGCCCCGACGGCGGCCGCTCGCTCATCGGCGACGACGGCGGCGACGGCTGGCTCGCCGGCTTCGGCGGCTCCGAGAACGCCATCAGGCTGGCCTGGCTGCTGCTGCTGCTGCTGCTACTGCCGCTGCCTCGAGTGTTCATGACCAATGCAATATTGCAATATTGCAATGCAATGCAAGAGTGAGAGTGAGAGTGAGCTAGGCTTTAGCTAAGCTAAGGTATATGAATGAGCTCGAGCTAAGCTTAGCTTGTGTGTAGTGCTCAAATGGGAGGGATTCAAGGGTGGTATTTAAATGGGTCTTGGAGAGAGAGGTCACTGTGGATGAGATGGCAGAGAGGGGTGGCATGCATGCACTGCACTTGTGTTAGCTAGACCTATAGCTGCATCATATCAAGGTTAGTTTGTAAGTATTCATCTTGTTTTCCAATGTGAGGTTTGGATTTGTGTGCCCTAATTTAACCTTAGGACCAGTAGAGGGGAATGTTGTGTGCTACTAATGTTTGTGTGTGAGTGTGTTGCTTCAAAATTAAGAATGGTTGGAA

>Taichung Sen 10 (TCS10)

TTCTTGTCATCTAATTGCAGGTTAGTTGTAAAATGTAAAATCGAATTGGACATTTTGAACCAGGTCATGGATTAATTGATTAAGATGCTAGAAGAAATTAACAAGCTGTGCCATGCAATATATCATGCATGCATGCATGAATATGATGGCTAAGTAGGTACTAATGCTAATATAGAAGAGAGAGAGAGAGAGAGAGAGAGAGAGAGAGAGAGAGAGAGATCATCTGCCTAAGTACATATTTGAAGAAGCTCTACTTAATTAACTAGAAATGGCGCCAAGCCACTCTTCTTGTTCGATCTACTGCTAGCTGCTGCTGCTGCTGCTGCTATACTACTCGATCTCTTGCTCGATCGATCAAACGCAGATTGATCAAGATCAACTCGATCTGATCATGGTAGACAGGAAATGATATATGCATGATCGCTCAGAGGCAAAGTGCGTGATTAGCCATGCAATGCCCGGTGCAACTCGATCAATGGGAGAGGAAGCTGAATGGAGAGTAGGAGTCGGAGCCCTGCGACGAGGCGACCATGTCGGCGGCGCCGCCGCTCGCCGGGAACCCGCAGGCGCCGAGCTGGTCCGCCGCGTCGCCGCCGCCCCAGAAGCCGGCGACCATCTGCGCGAGGTCGTCGACGTCCTCCCGGAGCCCCATCATGCCGTAGGCGTCGGCGTCGGAGTAGCGCCGCATGTCCTGATGATCGGCCGCGGCGCCGCCGCCCCTCGGCCGGAGGCAGCTCTCCGGCACCACGCTGCTCAGGTACCCGGAGTTGTCGTCGGCGCCGGAGAAGAGGAAGTCGTGGCCGTTCCTGTCCATGTCCAGCAGCGACGACGACATGCTGGAGCGGTGGGGATCAACCGGGACCATCACCGGCATCGTCGAGCACTCGCCCACCGACGACGCGCCCGACGCCGCGCCATGTCCGTGGTGGTGGTGGTGGTGGTGGTGGTGACCGTACGAGCCAATGTGCGGCGCCGCGCCCACGCCGCCGCCGTACTGCACCGAGGACGGCGCGGCGGCGGCAGCGGCGTACTGCGGCGCGTGGAACGGCGCGAGGAACGGCGGGTAGTTGTAGGCGGCGTGGGTGTAGACGAAGTTGGTGCGCGCCTGGGCGCCCTTCATGGACAGCGCGGCGCGGTCGTACGCCAGCGCCGCCTCCTGCGCCGTGTCGAACGTGCCCAGCCAGTGCCGCTCCTTGGTGGTCGGGTCGCGTATCTCGGCAGCGTACCTCCCCCACGGCCGCCGCCGCACGCCGAGGAACCTCCCTGGCTCCTGCGCGCGCCGCCTGCTGCGCCCCGACGGCGGCCGCTCGCTCATCGGCGACGACGGCGGCGACGGCTGGCTCGCCGGCTTCGGCGGCTCCGAGAACGCCATCAGGCTGGCCTGGCTGCTGCTGCTGCTGCTGCTACTGCCGCTGCCTCGAGTGTTCATGACCAATGCAATATTGCAATATTGCAATGCAATGCAAGAGTGAGAGTGAGAGTGAGCTAGGCTTTAGCTAAGCTAAGGTATATGAATGAGCTCGAGCTAAGCTTAGCTTGTGTGTAGTGCTCAAATGGGAGGGATTCAAGGGTGGTATTTAAATGGGTCTTGGAGAGAGAGGTCACTGTGGATGAGATGGCAGAGAGGGGTGGCATGCATGCACTGCACTTGTGTTAGCTAGACCTATAGCTGCATCATATCAAGGTTAGTTTGTAAGTATTCATCTTGTTTTCCAATGTGAGGTTTGGATTTGTGTGCCCTAATTTAACCTTAGGACCAGTAGAGGGGAATGTTGTGTGCTACTAATGTTTGTGTGTGAGTGTGTTGCTTCAAAATTAAGAATGGTTGGAA

>KHY4625

TTCTTGTCATCTAATTGCAGGTTAGTTGTAAAATGTAAAATCGAATTGGACATTTTGAACCAGGTCATGGATTAATTGATTAAGATGCTAGAAGAAATTAACAAGCTGTGCCATGCAATATATCATGCATGCATGCATGAATATGATGGCTAAGTAGGTACTAATGCTAATATAGAAGAGAGAGAGAGAGAGAGAGAGAGAGAGAGAGAGAGAGAGAGATCATCTGCCTAAGTACATATTTGAAGAAGCTCTACTTAATTAACTAGAAATGGCGCCAAGCCACTCTTCTTGTTCGATCTACTGCTAGCTGCTGCTGCTGCTGCTGCTATACTACTCGATCTCTTGCTCGATCGATCAAACGCAGATTGATCAAGATCAACTCGATCTGATCATGGTAGACAGGAAATGATATATGCATGATCGCTCAGAGGCAAAGTGCGTGATTAGCCATGCAATGCCCGGTGCAACTCGATCAATGGGAGAGGAAGCTGAATGGAGAGTAGGAGTCGGAGCCCTGCGACGAGGCGACCATGTCGGCGGCGCCGCCGCTCGCCGGGAACCCGCAGGCGCCGAGCTGGTCCGCCGCGTCGCCGCCGCCCCAGAAGCCGGCGACCATCTGCGCGAGGTCGTCGACGTCCTCCCGGAGCCCCATCATGCCGTAGGCGTCGGCGTCGGAGTAGCGCCGCATGTCCTGATGATCGGCCGCGGCGCCGCCGCCCCTCGGCCGGAGGCAGCTCTCCGGCACCACGCTGCTCAGGTACCCGGAGTTGTCGTCGGCGCCGGAGAAGAGGAAGTCGTGGCCGTTCCTGTCCATGTCCAGCAGCGACGACGACATGCTGGAGCGGTGGGGATCAACCGGGACCATCACCGGCATCGTCGAGCACTCGCCCACCGACGACGCGCCCGACGCCGCGCCATGTCCGTGGTGGTGGTGGTGGTGGTGGTGGTGACCGTACGAGCCAATGTGCGGCGCCGCGCCCACGCCGCCGCCGTACTGCACCGAGGACGGCGCGGCGGCGGCAGCGGCGTACTGCGGCGCGTGGAACGGCGCGAGGAACGGCGGGTAGTTGTAGGCGGCGTGGGTGTAGACGAAGTTGGTGCGCGCCTGGGCGCCCTTCATGGACAGCGCGGCGCGGTCGTACGCCAGCGCCGCCTCCTGCGCCGTGTCGAACGTGCCCAGCCAGTGCCGCTCCTTGGTGGTCGGGTCGCGTATCTCGGCAGCGTACCTCCCCCACGGCCGCCGCCGCACGCCGAGGAACCTCCCTGGCTCCTGCGCGCGCCGCCTGCTGCGCCCCGACGGCGGCCGCTCGCTCATCGGCGACGACGGCGGCGACGGCTGGCTCGCCGGCTTCGGCGGCTCCGAGAACGCCATCAGGCTGGCCTGGCTGCTGCTGCTGCTGCTGCTACTGCCGCTGCCTCGAGTGTTCATGACCAATGCAATATTGCAATATTGCAATGCAATGCAAGAGTGAGAGTGAGAGTGAGCTAGGCTTTAGCTAAGCTAAGGTATATGAATGAGCTCGAGCTAAGCTTAGCTTGTGTGTAGTGCTCAAATGGGAGGGATTCAAGGGTGGTATTTAAATGGGTCTTGGAGAGAGAGGTCACTGTGGATGAGATGGCAGAGAGGGGTGGCATGCATGCACTGCACTTGTGTTAGCTAGACCTATAGCTGCATCATATCAAGGTTAGTTTGTAAGTATTCATCTTGTTTTCCAATGTGAGGTTTGGATTTGTGTGCCCTAATTTAACCTTAGGACCAGTAGAGGGGAATGTTGTGTGCTACTAATGTTTGTGTGTGAGTGTGTTGCTTCAAAATTAAGAATGGTTGGAA

>Kaohsiung 139

TTCTTGTCATCTAATTGCAGGTTAGTTGTAAAATGTAAAATCGAATTGGACATTTTGAACCAGGTCATGGATTAATTGATTAAGATGCTAGAAGAAATTAACAAGCTGTGCCATGCAATATATCATGCATGCATGCATGAATATGATGGCTAAGTAGGTACTAATGCTAATATAGAAGAGAGAGAGAGAGAGAGAGAGAGAGAGAGAGAGAGAGAGAGATCATCTGCCTAAGTACATATTTGAAGAAGCTCTACTTAATTAACTAGAAATGGCGCCAAGCCACTCTTCTTGTTCGATCTACTGCTAGCTGCTGCTGCTGCTGCTGCTATACTACTCGATCTCTTGCTCGATCGATCAAACGCAGATTGATCAAGATCAACTCGATCTGATCATGGTAGACAGGAAATGATATATGCATGATCGCTCAGAGGCAAAGTGCGTGATTAGCCATGCAATGCCCGGTGCAACTCGATCAATGGGAGAGGAAGCTGAATGGAGAGTAGGAGTCGGAGCCCTGCGACGAGGCGACCATGTCGGCGGCGCCGCCGCTCGCCGGGAACCCGCAGGCGCCGAGCTGGTCCGCCGCGTCGCCGCCGCCCCAGAAGCCGGCGACCATCTGCGCGAGGTCGTCGACGTCCTCCCGGAGCCCCATCATGCCGTAGGCGTCGGCGTCGGAGTAGCGCCGCATGTCCTGATGATCGGCCGCGGCGCCGCCGCCCCTCGGCCGGAGGCAGCTCTCCGGCACCACGCTGCTCAGGTACCCGGAGTTGTCGTCGGCGCCGGAGAAGAGGAAGTCGTGGCCGTTCCTGTCCATGTCCAGCAGCGACGACGACATGCTGGAGCGGTGGGGATCAACCGGGACCATCACCGGCATCGTCGAGCACTCGCCCACCGACGACGCGCCCGACGCCGCGCCATGTCCGTGGTGGTGGTGGTGGTGGTGGTGGTGACCGTACGAGCCAATGTGCGGCGCCGCGCCCACGCCGCCGCCGTACTGCACCGAGGACGGCGCGGCGGCGGCAGCGGCGTACTGCGGCGCGTGGAACGGCGCGAGGAACGGCGGGTAGTTGTAGGCGGCGTGGGTGTAGACGAAGTTGGTGCGCGCCTGGGCGCCCTTCATGGACAGCGCGGCGCGGTCGTACGCCAGCGCCGCCTCCTGCGCCGTGTCGAACGTGCCCAGCCAGTGCCGCTCCTTGGTGGTCGGGTCGCGTATCTCGGCAGCGTACCTCCCCCACGGCCGCCGCCGCACGCCGAGGAACCTCCCTGGCTCCTGCGCGCGCCGCCTGCTGCGCCCCGACGGCGGCCGCTCGCTCATCGGCGACGACGGCGGCGACGGCTGGCTCGCCGGCTTCGGCGGCTCCGAGAACGCCATCAGGCTGGCCTGGCTGCTGCTGCTGCTGCTGCTACTGCCGCTGCCTCGAGTGTTCATGACCAATGCAATATTGCAATATTGCAATGCAATGCAAGAGTGAGAGTGAGAGTGAGCTAGGCTTTAGCTAAGCTAAGGTATATGAATGAGCTCGAGCTAAGCTTAGCTTGTGTGTAGTGCTCAAATGGGAGGGATTCAAGGGTGGTATTTAAATGGGTCTTGGAGAGAGAGGTCACTGTGGATGAGATGGCAGAGAGGGGTGGCATGCATGCACTGCACTTGTGTTAGCTAGACCTATAGCTGCATCATATCAAGGTTAGTTTGTAAGTATTCATCTTGTTTTCCAATGTGAGGTTTGGATTTGTGTGCCCTAATTTAACCTTAGGACCAGTAGAGGGGAATGTTGTGTGCTACTAATGTTTGTGTGTGAGTGTGTTGCTTCAAAATTAAGAATGGTTGGAA

>Taiken10

TTCTTGTCATCTAATTGCAGGTTAGTTGTAAAATGTAAAATCGAATTGGACATTTTGAACCAGGTCATGGATTAATTGATTAAGATGCTAGAAGAAATTAACAAGCTGTGCCATGCAATATATCATGCATGCATGCATGAATATGATGGCTAAGTAGGTACTAATGCTAATATAGAAGAGAGAGAGAGAGAGAGAGAGAGAGAGAGAGAGAGAGAGAGATCATCTGCCTAAGTACATATTTGAAGAAGCTCTACTTAATTAACTAGAAATGGCGCCAAGCCACTCTTCTTGTTCGATCTACTGCTAGCTGCTGCTGCTGCTGCTGCTATACTACTCGATCTCTTGCTCGATCGATCAAACGCAGATTGATCAAGATCAACTCGATCTGATCATGGTAGACAGGAAATGATATATGCATGATCGCTCAGAGGCAAAGTGCGTGATTAGCCATGCAATGCCCGGTGCAACTCGATCAATGGGAGAGGAAGCTGAATGGAGAGTAGGAGTCGGAGCCCTGCGACGAGGCGACCATGTCGGCGGCGCCGCCGCTCGCCGGGAACCCGCAGGCGCCGAGCTGGTCCGCCGCGTCGCCGCCGCCCCAGAAGCCGGCGACCATCTGCGCGAGGTCGTCGACGTCCTCCCGGAGCCCCATCATGCCGTAGGCGTCGGCGTCGGAGTAGCGCCGCATGTCCTGATGATCGGCCGCGGCGCCGCCGCCCCTCGGCCGGAGGCAGCTCTCCGGCACCACGCTGCTCAGGTACCCGGAGTTGTCGTCGGCGCCGGAGAAGAGGAAGTCGTGGCCGTTCCTGTCCATGTCCAGCAGCGACGACGACATGCTGGAGCGGTGGGGATCAACCGGGACCATCACCGGCATCGTCGAGCACTCGCCCACCGACGACGCGCCCGACGCCGCGCCATGTCCGTGGTGGTGGTGGTGGTGGTGGTGGTGACCGTACGAGCCAATGTGCGGCGCCGCGCCCACGCCGCCGCCGTACTGCACCGAGGACGGCGCGGCGGCGGCAGCGGCGTACTGCGGCGCGTGGAACGGCGCGAGGAACGGCGGGTAGTTGTAGGCGGCGTGGGTGTAGACGAAGTTGGTGCGCGCCTGGGCGCCCTTCATGGACAGCGCGGCGCGGTCGTACGCCAGCGCCGCCTCCTGCGCCGTGTCGAACGTGCCCAGCCAGTGCCGCTCCTTGGTGGTCGGGTCGCGTATCTCGGCAGCGTACCTCCCCCACGGCCGCCGCCGCACGCCGAGGAACCTCCCTGGCTCCTGCGCGCGCCGCCTGCTGCGCCCCGACGGCGGCCGCTCGCTCATCGGCGACGACGGCGGCGACGGCTGGCTCGCCGGCTTCGGCGGCTCCGAGAACGCCATCAGGCTGGCCTGGCTGCTGCTGCTGCTGCTGCTACTGCCGCTGCCTCGAGTGTTCATGACCAATGCAATATTGCAATATTGCAATGCAATGCAAGAGTGAGAGTGAGAGTGAGCTAGGCTTTAGCTAAGCTAAGGTATATGAATGAGCTCGAGCTAAGCTTAGCTTGTGTGTAGTGCTCAAATGGGAGGGATTCAAGGGTGGTATTTAAATGGGTCTTGGAGAGAGAGGTCACTGTGGATGAGATGGCAGAGAGGGGTGGCATGCATGCACTGCACTTGTGTTAGCTAGACCTATAGCTGCATCATATCAAGGTTAGTTTGTAAGTATTCATCTTGTTTTCCAATGTGAGGTTTGGATTTGTGTGCCCTAATTTAACCTTAGGACCAGTAGAGGGGAATGTTGTGTGCTACTAATGTTTGTGTGTGAGTGTGTTGCTTCAAAATTAAGAATGGTTGGAA

>Tainung 75

TTCTTGTCATCTAATTGCAGGTTAGTTGTAAAATGTAAAATCGAATTGGACATTTTGAACCAGGTCATGGATTAATTGATTAAGATGCTAGAAGAAATTAACAAGCTGTGCCATGCAATATATCATGCATGCATGCATGAATATGATGGCTAAGTAGGTACTAATGCTAATATAGAAGAGAGAGAGAGAGAGAGAGAGAGAGAGAGAGAGAGAGAGAGATCATCTGCCTAAGTACATATTTGAAGAAGCTCTACTTAATTAACTAGAAATGGCGCCAAGCCACTCTTCTTGTTCGATCTACTGCTAGCTGCTGCTGCTGCTGCTGCTATACTACTCGATCTCTTGCTCGATCGATCAAACGCAGATTGATCAAGATCAACTCGATCTGATCATGGTAGACAGGAAATGATATATGCATGATCGCTCAGAGGCAAAGTGCGTGATTAGCCATGCAATGCCCGGTGCAACTCGATCAATGGGAGAGGAAGCTGAATGGAGAGTAGGAGTCGGAGCCCTGCGACGAGGCGACCATGTCGGCGGCGCCGCCGCTCGCCGGGAACCCGCAGGCGCCGAGCTGGTCCGCCGCGTCGCCGCCGCCCCAGAAGCCGGCGACCATCTGCGCGAGGTCGTCGACGTCCTCCCGGAGCCCCATCATGCCGTAGGCGTCGGCGTCGGAGTAGCGCCGCATGTCCTGATGATCGGCCGCGGCGCCGCCGCCCCTCGGCCGGAGGCAGCTCTCCGGCACCACGCTGCTCAGGTACCCGGAGTTGTCGTCGGCGCCGGAGAAGAGGAAGTCGTGGCCGTTCCTGTCCATGTCCAGCAGCGACGACGACATGCTGGAGCGGTGGGGATCAACCGGGACCATCACCGGCATCGTCGAGCACTCGCCCACCGACGACGCGCCCGACGCCGCGCCATGTCCGTGGTGGTGGTGGTGGTGGTGGTGGTGACCGTACGAGCCAATGTGCGGCGCCGCGCCCACGCCGCCGCCGTACTGCACCGAGGACGGCGCGGCGGCGGCAGCGGCGTACTGCGGCGCGTGGAACGGCGCGAGGAACGGCGGGTAGTTGTAGGCGGCGTGGGTGTAGACGAAGTTGGTGCGCGCCTGGGCGCCCTTCATGGACAGCGCGGCGCGGTCGTACGCCAGCGCCGCCTCCTGCGCCGTGTCGAACGTGCCCAGCCAGTGCCGCTCCTTGGTGGTCGGGTCGCGTATCTCGGCAGCGTACCTCCCCCACGGCCGCCGCCGCACGCCGAGGAACCTCCCTGGCTCCTGCGCGCGCCGCCTGCTGCGCCCCGACGGCGGCCGCTCGCTCATCGGCGACGACGGCGGCGACGGCTGGCTCGCCGGCTTCGGCGGCTCCGAGAACGCCATCAGGCTGGCCTGGCTGCTGCTGCTGCTGCTGCTACTGCCGCTGCCTCGAGTGTTCATGACCAATGCAATATTGCAATATTGCAATGCAATGCAAGAGTGAGAGTGAGAGTGAGCTAGGCTTTAGCTAAGCTAAGGTATATGAATGAGCTCGAGCTAAGCTTAGCTTGTGTGTAGTGCTCAAATGGGAGGGATTCAAGGGTGGTATTTAAATGGGTCTTGGAGAGAGAGGTCACTGTGGATGAGATGGCAGAGAGGGGTGGCATGCATGCACTGCACTTGTGTTAGCTAGACCTATAGCTGCATCATATCAAGGTTAGTTTGTAAGTATTCATCTTGTTTTCCAATGTGAGGTTTGGATTTGTGTGCCCTAATTTAACCTTAGGACCAGTAGAGGGGAATGTTGTGTGCTACTAATGTTTGTGTGTGAGTGTGTTGCTTCAAAATTAAGAATGGTTGGAA

>DULAR

TTCTTGTCATCTAATTGCAGGTTAGTTGTAAAATGTAAAATCGAATTGGACATTTTGAACCAGGTCATGGATTAATTGATTAAGATGCTAGAAGAAATTAACAAGCTGTGCCATGCAATATATCATGCATGCATGCATGAATATGATGGCTAAGTAGGTACTAATGCTAATATAGAAGAGAGAGAGAGAGAGAGAGAGAGAGAGAGAGAGAGAGAGAGAGAGAGATCATCTGCCTAAGTACATATTTGAAGAAGCTCTACTTAATTAACTAGAAATGGCGCCAAGCCACTCTTCTTGTTCGATCTACTGCTAGCTGCTGCTGCTGCTGCTGCTATACTACTCGATCTCTTGCTCGATCGATCAAACGCAGATTGATCAAGATCAACTCGATCTGATCATGGTAGACAGGAAATGATATATGCATGATCGCTCAGAGGCAAAGTGCGTGATTAGCCATGCAATGCCCGGTGCAACTCGATCAATGGGAGAGGAAGCTGAATGGAGAGTAGGAGTCGGAGCCCTGCGACGAGGCGACCATGTCGGCGGCGCCGCCGCTCGCCGGGAACCCGCAGGCGCCGAGCTGGTCCGCCGCGTCGCCGCCGCCCCAGAAGCCGGCGACCATCTGCGCGAGGTCGTCGACGTCCTCCCGGAGCCCCATCATGCCGTAGGCGTCGGCGTCGGAGTAGCGCCGCATGTCCTGATGATCGGCCGCGGCGCCGCCGCCCCTCGGCCGGAGGCAGCTCTCCGGCACCACGCTGCTCAGGTACCCGGAGTTGTCGTCGGCGCCGGAGAAGAGGAAGTCGTGGCCGTTCCTGTCCATGTCCAGCAGCGACGACGACATGCTGGAGCGGTGGGGATCAACCGGGACCATCACCGGCATCGTCGAGCACTCGCCCACCGACGACGCGCCCGACGCCGCGCCATGTCCGTGGTGGTGGTGGTGGTGGTGGTGGTGACCGTACGAGCCAATGTGCGGCGCCGCGCCCACGCCGCCGCCGTACTGCACCGAGGACGGCGCGGCGGCGGCAGCGGCGTACTGCGGCGCGTGGAACGGCGCGAGGAACGGCGGGTAGTTGTAGGCGGCGTGGGTGTAGACGAAGTTGGTGCGCGCCTGGGCGCCCTTCATGGACAGCGCGGCGCGGTCGTACGCCAGCGCCGCCTCCTGCGCCGTGTCGAACGTGCCCAGCCAGTGCCGCTCCTTGGTGGTCGGGTCGCGTATCTCGGCAGCGTACCTCCCCCACGGCCGCCGCCGCACGCCGAGGAACCTCCCTGGCTCCTGCGCGCGCCGCCTGCTGCGCCCCGACGGCGGCCGCTCGCTCATCGGCGACGACGGCGGCGACGGCTGGCTCGCCGGCTTCGGCGGCTCCGAGAACGCCATCAGGCTGGCCTGGCTGCTGCTGCTGCTGCTGCTACTGCCGCTGCCTCGAGTGTTCATGACCAATGCAATATTGCAATATTGCAATGCAATGCAAGAGTGAGAGTGAGAGTGAGCTAGGCTTTAGCTAAGCTAAGGTATATGAATGAGCTCGAGCTAAGCTTAGCTTGTGTGTAGTGCTCAAATGGGAGGGATTCAAGGGTGGTATTTAAATGGGTCTTGGAGAGAGAGGTCACTGTGGATGAGATGGCAGAGAGGGGTGGCATGCATGCACTGCACTTGTGTTAGCTAGACCTATAGCTGCATCATATCAAGGTTAGTTTGTAAGTATTCATCTTGTTTTCCAATGTGAGGTTTGGATTTGTGTGCCCTAATTTAACCTTAGGACCAGTAGAGGGGAATGTTGTGTGCTACTAATGTTTGTGTGTGAGTGTGTTGCTTCAAAATTAAGAATGGTTGGAA

>Kano Sen 6

TTCTTGTCATCTAATTGCAGGTTAGTTGTAAAATGTAAAATCGAATTGGACATTTTGAACCAGGTCATGGATTAATTGATTAAGATGCTAGAAGAAATTAACAAGCTGTGCCATGCAATATATCATGCATGCATGCATGAATATGATGGCTAAGTAGGTACTAATGCTAATATAGAAGAGAGAGAGAGAGAGAGAGAGAGAGAGAGAGAGAGAGAGATCATCTGCCTAAGTACATATTTGAAGAAGCTCTACTTAATTAACTAGAAATGGCGCCAAGCCACTCTTCTTGTTCGATCTACTGCTAGCTGCTGCTGCTGCTGCTGCTATACTACTCGATCTCTTGCTCGATCGATCAAACGCAGATTGATCAAGATCAACTCGATCTGATCATGGTAGACAGGAAATGATATATGCATGATCGCTCAGAGGCAAAGTGCGTGATTAGCCATGCAATGCCCGGTGCAACTCGATCAATGGGAGAGGAAGCTGAATGGAGAGTAGGAGTCGGAGCCCTGCGACGAGGCGACCATGTCGGCGGCGCCGCCGCTCGCCGGGAACCCGCAGGCGCCGAGCTGGTCCGCCGCGTCGCCGCCGCCCCAGAAGCCGGCGACCATCTGCGCGAGGTCGTCGACGTCCTCCCGGAGCCCCATCATGCCGTAGGCGTCGGCGTCGGAGTAGCGCCGCATGTCCTGATGATCGGCCGCGGCGCCGCCGCCCCTCGGCCGGAGGCAGCTCTCCGGCACCACGCTGCTCAGGTACCCGGAGTTGTCGTCGGCGCCGGAGAAGAGGAAGTCGTGGCCGTTCCTGTCCATGTCCAGCAGCGACGACGACATGCTGGAGCGGTGGGGATCAACCGGGACCATCACCGGCATCGTCGAGCACTCGCCCACCGACGACGCGCCCGACGCCGCGCCATGTCCGTGGTGGTGGTGGTGGTGGTGGTGGTGACCGTACGAGCCAATGTGCGGCGCCGCGCCCACGCCGCCGCCGTACTGCACCGAGGACGGCGCGGCGGCGGCAGCGGCGTACTGCGGCGCGTGGAACGGCGCGAGGAACGGCGGGTAGTTGTAGGCGGCGTGGGTGTAGACGAAGTTGGTGCGCGCCTGGGCGCCCTTCATGGACAGCGCGGCGCGGTCGTACGCCAGCGCCGCCTCCTGCGCCGTGTCGAACGTGCCCAGCCAGTGCCGCTCCTTGGTGGTCGGGTCGCGTATCTCGGCAGCGTACCTCCCCCACGGCCGCCGCCGCACGCCGAGGAACCTCCCTGGCTCCTGCGCGCGCCGCCTGCTGCGCCCCGACGGCGGCCGCTCGCTCATCGGCGACGACGGCGGCGACGGCTGGCTCGCCGGCTTCGGCGGCTCCGAGAACGCCATCAGGCTGGCCTGGCTGCTGCTGCTGCTGCTGCTACTGCCGCTGCCTCGAGTGTTCATGACCAATGCAATATTGCAATATTGCAATGCAATGCAAGAGTGAGAGTGAGAGTGAGCTAGGCTTTAGCTAAGCTAAGGTATATGAATGAGCTCGAGCTAAGCTTAGCTTGTGTGTAGTGCTCAAATGGGAGGGATTCAAGGGTGGTATTTAAATGGGTCTTGGAGAGAGAGGTCACTGTGGATGAGATGGCAGAGAGGGGTGGCATGCATGCACTGCACTTGTGTTAGCTAGACCTATAGCTGCATCATATCAAGGTTAGTTTGTAAGTATTCATCTTGTTTTCCAATGTGAGGTTTGGATTTGTGTGCCCTAATTTAACCTTAGGACCAGTAGAGGGGAATGTTGTGTGCTACTAATGTTTGTGTGTGAGTGTGTTGCTTCAAAATTAAGAATGGTTGGAA

>Tainan11

TTCTTGTCATCTAATTGCAGGTTAGTTGTAAAATGTAAAATCGAATTGGACATTTTGAACCAGGTCATGGATTAATTGATTAAGATGCTAGAAGAAATTAACAAGCTGTGCCATGCAATATATCATGCATGCATGCATGAATATGATGGCTAAGTAGGTACTAATGCTAATATAGAAGAGAGAGAGAGAGAGAGAGAGAGAGAGAGAGAGAGAGAGAGATCATCTGCCTAAGTACATATTTGAAGAAGCTCTACTTAATTAACTAGAAATGGCGCCAAGCCACTCTTCTTGTTCGATCTACTGCTAGCTGCTGCTGCTGCTGCTGCTATACTACTCGATCTCTTGCTCGATCGATCAAACGCAGATTGATCAAGATCAACTCGATCTGATCATGGTAGACAGGAAATGATATATGCATGATCGCTCAGAGGCAAAGTGCGTGATTAGCCATGCAATGCCCGGTGCAACTCGATCAATGGGAGAGGAAGCTGAATGGAGAGTAGGAGTCGGAGCCCTGCGACGAGGCGACCATGTCGGCGGCGCCGCCGCTCGCCGGGAACCCGCAGGCGCCGAGCTGGTCCGCCGCGTCGCCGCCGCCCCAGAAGCCGGCGACCATCTGCGCGAGGTCGTCGACGTCCTCCCGGAGCCCCATCATGCCGTAGGCGTCGGCGTCGGAGTAGCGCCGCATGTCCTGATGATCGGCCGCGGCGCCGCCGCCCCTCGGCCGGAGGCAGCTCTCCGGCACCACGCTGCTCAGGTACCCGGAGTTGTCGTCGGCGCCGGAGAAGAGGAAGTCGTGGCCGTTCCTGTCCATGTCCAGCAGCGACGACGACATGCTGGAGCGGTGGGGATCAACCGGGACCATCACCGGCATCGTCGAGCACTCGCCCACCGACGACGCGCCCGACGCCGCGCCATGTCCGTGGTGGTGGTGGTGGTGGTGGTGGTGACCGTACGAGCCAATGTGCGGCGCCGCGCCCACGCCGCCGCCGTACTGCACCGAGGACGGCGCGGCGGCGGCAGCGGCGTACTGCGGCGCGTGGAACGGCGCGAGGAACGGCGGGTAGTTGTAGGCGGCGTGGGTGTAGACGAAGTTGGTGCGCGCCTGGGCGCCCTTCATGGACAGCGCGGCGCGGTCGTACGCCAGCGCCGCCTCCTGCGCCGTGTCGAACGTGCCCAGCCAGTGCCGCTCCTTGGTGGTCGGGTCGCGTATCTCGGCAGCGTACCTCCCCCACGGCCGCCGCCGCACGCCGAGGAACCTCCCTGGCTCCTGCGCGCGCCGCCTGCTGCGCCCCGACGGCGGCCGCTCGCTCATCGGCGACGACGGCGGCGACGGCTGGCTCGCCGGCTTCGGCGGCTCCGAGAACGCCATCAGGCTGGCCTGGCTGCTGCTGCTGCTGCTGCTACTGCCGCTGCCTCGAGTGTTCATGACCAATGCAATATTGCAATATTGCAATGCAATGCAAGAGTGAGAGTGAGAGTGAGCTAGGCTTTAGCTAAGCTAAGGTATATGAATGAGCTCGAGCTAAGCTTAGCTTGTGTGTAGTGCTCAAATGGGAGGGATTCAAGGGTGGTATTTAAATGGGTCTTGGAGAGAGAGGTCACTGTGGATGAGATGGCAGAGAGGGGTGGCATGCATGCACTGCACTTGTGTTAGCTAGACCTATAGCTGCATCATATCAAGGTTAGTTTGTAAGTATTCATCTTGTTTTCCAATGTGAGGTTTGGATTTGTGTGCCCTAATTTAACCTTAGGACCAGTAGAGGGGAATGTTGTGTGCTACTAATGTTTGTGTGTGAGTGTGTTGCTTCAAAATTAAGAATGGTTGGAA

>Nippobare

TTCTTGTCATCTAATTGCAGGTTAGTTGTAAAATGTAAAATCGAATTGGACATTTTGAACCAGGTCATGGATTAATTGATTAAGATGCTAGAAGAAATTAACAAGCTGTGCCATGCAATATATCATGCATGCATGCATGAATATGATGGCTAAGTAGGTACTAATGCTAATATAGAAGAGAGAGAGAGAGAGAGAGAGAGAGAGAGAGAGAGAGAGAGATCATCTGCCTAAGTACATATTTGAAGAAGCTCTACTTAATTAACTAGAAATGGCGCCAAGCCACTCTTCTTGTTCGATCTACTGCTAGCTGCTGCTGCTGCTGCTGCTATACTACTCGATCTCTTGCTCGATCGATCAAACGCAGATTGATCAAGATCAACTCGATCTGATCATGGTAGACAGGAAATGATATATGCATGATCGCTCAGAGGCAAAGTGCGTGATTAGCCATGCAATGCCCGGTGCAACTCGATCAATGGGAGAGGAAGCTGAATGGAGAGTAGGAGTCGGAGCCCTGCGACGAGGCGACCATGTCGGCGGCGCCGCCGCTCGCCGGGAACCCGCAGGCGCCGAGCTGGTCCGCCGCGTCGCCGCCGCCCCAGAAGCCGGCGACCATCTGCGCGAGGTCGTCGACGTCCTCCCGGAGCCCCATCATGCCGTAGGCGTCGGCGTCGGAGTAGCGCCGCATGTCCTGATGATCGGCCGCGGCGCCGCCGCCCCTCGGCCGGAGGCAGCTCTCCGGCACCACGCTGCTCAGGTACCCGGAGTTGTCGTCGGCGCCGGAGAAGAGGAAGTCGTGGCCGTTCCTGTCCATGTCCAGCAGCGACGACGACATGCTGGAGCGGTGGGGATCAACCGGGACCATCACCGGCATCGTCGAGCACTCGCCCACCGACGACGCGCCCGACGCCGCGCCATGTCCGTGGTGGTGGTGGTGGTGGTGGTGGTGACCGTACGAGCCAATGTGCGGCGCCGCGCCCACGCCGCCGCCGTACTGCACCGAGGACGGCGCGGCGGCGGCAGCGGCGTACTGCGGCGCGTGGAACGGCGCGAGGAACGGCGGGTAGTTGTAGGCGGCGTGGGTGTAGACGAAGTTGGTGCGCGCCTGGGCGCCCTTCATGGACAGCGCGGCGCGGTCGTACGCCAGCGCCGCCTCCTGCGCCGTGTCGAACGTGCCCAGCCAGTGCCGCTCCTTGGTGGTCGGGTCGCGTATCTCGGCAGCGTACCTCCCCCACGGCCGCCGCCGCACGCCGAGGAACCTCCCTGGCTCCTGCGCGCGCCGCCTGCTGCGCCCCGACGGCGGCCGCTCGCTCATCGGCGACGACGGCGGCGACGGCTGGCTCGCCGGCTTCGGCGGCTCCGAGAACGCCATCAGGCTGGCCTGGCTGCTGCTGCTGCTGCTGCTACTGCCGCTGCCTCGAGTGTTCATGACCAATGCAATATTGCAATATTGCAATGCAATGCAAGAGTGAGAGTGAGAGTGAGCTAGGCTTTAGCTAAGCTAAGGTATATGAATGAGCTCGAGCTAAGCTTAGCTTGTGTGTAGTGCTCAAATGGGAGGGATTCAAGGGTGGTATTTAAATGGGTCTTGGAGAGAGAGGTCACTGTGGATGAGATGGCAGAGAGGGGTGGCATGCATGCACTGCACTTGTGTTAGCTAGACCTATAGCTGCATCATATCAAGGTTAGTTTGTAAGTATTCATCTTGTTTTCCAATGTGAGGTTTGGATTTGTGTGCCCTAATTTAACCTTAGGACCAGTAGAGGGGAATGTTGTGTGCTACTAATGTTTGTGTGTGAGTGTGTTGCTTCAAAATTAAGAATGGTTGGAA

>Koshihikari

TTCTTGTCATCTAATTGCAGGTTAGTTGTAAAATGTAAAATCGAATTGGACATTTTGAACCAGGTCATGGATTAATTGATTAAGATGCTAGAAGAAATTAACAAGCTGTGCCATGCAATATATCATGCATGCATGCATGAATATGATGGCTAAGTAGGTACTAATGCTAATATAGAAGAGAGAGAGAGAGAGAGAGAGAGAGAGAGAGAGAGAGAGAGATCATCTGCCTAAGTACATATTTGAAGAAGCTCTACTTAATTAACTAGAAATGGCGCCAAGCCACTCTTCTTGTTCGATCTACTGCTAGCTGCTGCTGCTGCTGCTGCTATACTACTCGATCTCTTGCTCGATCGATCAAACGCAGATTGATCAAGATCAACTCGATCTGATCATGGTAGACAGGAAATGATATATGCATGATCGCTCAGAGGCAAAGTGCGTGATTAGCCATGCAATGCCCGGTGCAACTCGATCAATGGGAGAGGAAGCTGAATGGAGAGTAGGAGTCGGAGCCCTGCGACGAGGCGACCATGTCGGCGGCGCCGCCGCTCGCCGGGAACCCGCAGGCGCCGAGCTGGTCCGCCGCGTCGCCGCCGCCCCAGAAGCCGGCGACCATCTGCGCGAGGTCGTCGACGTCCTCCCGGAGCCCCATCATGCCGTAGGCGTCGGCGTCGGAGTAGCGCCGCATGTCCTGATGATCGGCCGCGGCGCCGCCGCCCCTCGGCCGGAGGCAGCTCTCCGGCACCACGCTGCTCAGGTACCCGGAGTTGTCGTCGGCGCCGGAGAAGAGGAAGTCGTGGCCGTTCCTGTCCATGTCCAGCAGCGACGACGACATGCTGGAGCGGTGGGGATCAACCGGGACCATCACCGGCATCGTCGAGCACTCGCCCACCGACGACGCGCCCGACGCCGCGCCATGTCCGTGGTGGTGGTGGTGGTGGTGGTGGTGACCGTACGAGCCAATGTGCGGCGCCGCGCCCACGCCGCCGCCGTACTGCACCGAGGACGGCGCGGCGGCGGCAGCGGCGTACTGCGGCGCGTGGAACGGCGCGAGGAACGGCGGGTAGTTGTAGGCGGCGTGGGTGTAGACGAAGTTGGTGCGCGCCTGGGCGCCCTTCATGGACAGCGCGGCGCGGTCGTACGCCAGCGCCGCCTCCTGCGCCGTGTCGAACGTGCCCAGCCAGTGCCGCTCCTTGGTGGTCGGGTCGCGTATCTCGGCAGCGTACCTCCCCCACGGCCGCCGCCGCACGCCGAGGAACCTCCCTGGCTCCTGCGCGCGCCGCCTGCTGCGCCCCGACGGCGGCCGCTCGCTCATCGGCGACGACGGCGGCGACGGCTGGCTCGCCGGCTTCGGCGGCTCCGAGAACGCCATCAGGCTGGCCTGGCTGCTGCTGCTGCTGCTGCTACTGCCGCTGCCTCGAGTGTTCATGACCAATGCAATATTGCAATATTGCAATGCAATGCAAGAGTGAGAGTGAGAGTGAGCTAGGCTTTAGCTAAGCTAAGGTATATGAATGAGCTCGAGCTAAGCTTAGCTTGTGTGTAGTGCTCAAATGGGAGGGATTCAAGGGTGGTATTTAAATGGGTCTTGGAGAGAGAGGTCACTGTGGATGAGATGGCAGAGAGGGGTGGCATGCATGCACTGCACTTGTGTTAGCTAGACCTATAGCTGCATCATATCAAGGTTAGTTTGTAAGTATTCATCTTGTTTTCCAATGTGAGGTTTGGATTTGTGTGCCCTAATTTAACCTTAGGACCAGTAGAGGGGAATGTTGTGTGCTACTAATGTTTGTGTGTGAGTGTGTTGCTTCAAAATTAAGAATGGTTGGAA

>NonaBokra

TTCTTGTCATCTAATTGCAGGTTAGTTGTAAAATGTAAAATCGAATTGGACATTTTGAACCAGGTCATGGATTAATTGATTAAGATGCTAGAAGAAATTAACAAGCTGTGCCATGCAATATATCATGCATGCATGCATGAATATGATGGCTAAGTAGGTACTAATGCTAATATAGAAGAGAGAGAGAGAGAGAGAGAGAGAGAGAGAGAGAGAGAGAGAGAGAGATCATCTGCCTAAGTACATATTTGAAGAAGCTCTACTTAATTAACTAGAAATGGCGCCAAGCCACTCTTCTTGTTCGATCTACTGCTAGCTGCTGCTGCTGCTGCTGCTATACTACTCGATCTCTTGCTCGATCGATCAAACGCAGATTGATCAAGATCAACTCGATCTGATCATGGTAGACAGGAAATGATATATGCATGATCGCTCAGAGGCAAAGTGCGTGATTAGCCATGCAATGCCCGGTGCAACTCGATCAATGGGAGAGGAAGCTGAATGGAGAGTAGGAGTCGGAGCCCTGCGACGAGGCGACCATGTCGGCGGCGCCGCCGCTCGCCGGGAACCCGCAGGCGCCGAGCTGGTCCGCCGCGTCGCCGCCGCCCCAGAAGCCGGCGACCATCTGCGCGAGGTCGTCGACGTCCTCCCGGAGCCCCATCATGCCGTAGGCGTCGGCGTCGGAGTAGCGCCGCATGTCCTGATGATCGGCCGCGGCGCCGCCGCCCCTCGGCCGGAGGCAGCTCTCCGGCACCACGCTGCTCAGGTACCCGGAGTTGTCGTCGGCGCCGGAGAAGAGGAAGTCGTGGCCGTTCCTGTCCATGTCCAGCAGCGACGACGACATGCTGGAGCGGTGGGGATCAACCGGGACCATCACCGGCATCGTCGAGCACTCGCCCACCGACGACGCGCCCGACGCCGCGCCATGTCCGTGGTGGTGGTGGTGGTGGTGGTGGTGACCGTACGAGCCAATGTGCGGCGCCGCGCCCACGCCGCCGCCGTACTGCACCGAGGACGGCGCGGCGGCGGCAGCGGCGTACTGCGGCGCGTGGAACGGCGCGAGGAACGGCGGGTAGTTGTAGGCGGCGTGGGTGTAGACGAAGTTGGTGCGCGCCTGGGCGCCCTTCATGGACAGCGCGGCGCGGTCGTACGCCAGCGCCGCCTCCTGCGCCGTGTCGAACGTGCCCAGCCAGTGCCGCTCCTTGGTGGTCGGGTCGCGTATCTCGGCAGCGTACCTCCCCCACGGCCGCCGCCGCACGCCGAGGAACCTCCCTGGCTCCTGCGCGCGCCGCCTGCTGCGCCCCGACGGCGGCCGCTCGCTCATCGGCGACGACGGCGGCGACGGCTGGCTCGCCGGCTTCGGCGGCTCCGAGAACGCCATCAGGCTGGCCTGGCTGCTGCTGCTGCTGCTGCTACTGCCGCTGCCTCGAGTGTTCATGACCAATGCAATATTGCAATATTGCAATGCAATGCAAGAGTGAGAGTGAGAGTGAGCTAGGCTTTAGCTAAGCTAAGGTATATGAATGAGCTCGAGCTAAGCTTAGCTTGTGTGTAGTGCTCAAATGGGAGGGATTCAAGGGTGGTATTTAAATGGGTCTTGGAGAGAGAGGTCACTGTGGATGAGATGGCAGAGAGGGGTGGCATGCATGCACTGCACTTGTGTTAGCTAGACCTATAGCTGCATCATATCAAGGTTAGTTTGTAAGTATTCATCTTGTTTTCCAATGTGAGGTTTGGATTTGTGTGCCCTAATTTAACCTTAGGACCAGTAGAGGGGAATGTTGTGTGCTACTAATGTTTGTGTGTGAGTGTGTTGCTTCAAAATTAAGAATGGTTGGAA

>Habataki

TTCTTGTCATCTAATTGCAGGTTAGTTGTAAAATGTAAAATCGAATTGGACATTTTGAACCAGGTCATGGATTAATTGATTAAGATGCTAGAAGAAATTAACAAGCTGTGCCATGCAATATATCATGCATGCATGCATGAATATGATGGCTAAGTAGGTACTAATGCTAATATAGAAGAGAGAGAGAGAGAGAGAGAGAGAGAGAGAGAGAGAGAGAGATCATCTGCCTAAGTACATATTTGAAGAAGCTCTACTTAATTAACTAGAAATGGCGCCAAGCCACTCTTCTTGTTCGATCTACTGCTAGCTGCTGCTGCTGCTGCTGCTATACTACTCGATCTCTTGCTCGATCGATCAAACGCAGATTGATCAAGATCAACTCGATCTGATCATGGTAGACAGGAAATGATATATGCATGATCGCTCAGAGGCAAAGTGCGTGATTAGCCATGCAATGCCCGGTGCAACTCGATCAATGGGAGAGGAAGCTGAATGGAGAGTAGGAGTCGGAGCCCTGCGACGAGGCGACCATGTCGGCGGCGCCGCCGCTCGCCGGGAACCCGCAGGCGCCGAGCTGGTCCGCCGCGTCGCCGCCGCCCCAGAAGCCGGCGACCATCTGCGCGAGGTCGTCGACGTCCTCCCGGAGCCCCATCATGCCGTAGGCGTCGGCGTCGGAGTAGCGCCGCATGTCCTGATGATCGGCCGCGGCGCCGCCGCCCCTCGGCCGGAGGCAGCTCTCCGGCACCACGCTGCTCAGGTACCCGGAGTTGTCGTCGGCGCCGGAGAAGAGGAAGTCGTGGCCGTTCCTGTCCATGTCCAGCAGCGACGACGACATGCTGGAGCGGTGGGGATCAACCGGGACCATCACCGGCATCGTCGAGCACTCGCCCACCGACGACGCGCCCGACGCCGCGCCATGTCCGTGGTGGTGGTGGTGGTGGTGGTGGTGACCGTACGAGCCAATGTGCGGCGCCGCGCCCACGCCGCCGCCGTACTGCACCGAGGACGGCGCGGCGGCGGCAGCGGCGTACTGCGGCGCGTGGAACGGCGCGAGGAACGGCGGGTAGTTGTAGGCGGCGTGGGTGTAGACGAAGTTGGTGCGCGCCTGGGCGCCCTTCATGGACAGCGCGGCGCGGTCGTACGCCAGCGCCGCCTCCTGCGCCGTGTCGAACGTGCCCAGCCAGTGCCGCTCCTTGGTGGTCGGGTCGCGTATCTCGGCAGCGTACCTCCCCCACGGCCGCCGCCGCACGCCGAGGAACCTCCCTGGCTCCTGCGCGCGCCGCCTGCTGCGCCCCGACGGCGGCCGCTCGCTCATCGGCGACGACGGCGGCGACGGCTGGCTCGCCGGCTTCGGCGGCTCCGAGAACGCCATCAGGCTGGCCTGGCTGCTGCTGCTGCTGCTGCTACTGCCGCTGCCTCGAGTGTTCATGACCAATGCAATATTGCAATATTGCAATGCAATGCAAGAGTGAGAGTGAGAGTGAGCTAGGCTTTAGCTAAGCTAAGGTATATGAATGAGCTCGAGCTAAGCTTAGCTTGTGTGTAGTGCTCAAATGGGAGGGATTCAAGGGTGGTATTTAAATGGGTCTTGGAGAGAGAGGTCACTGTGGATGAGATGGCAGAGAGGGGTGGCATGCATGCACTGCACTTGTGTTAGCTAGACCTATAGCTGCATCATATCAAGGTTAGTTTGTAAGTATTCATCTTGTTTTCCAATGTGAGGTTTGGATTTGTGTGCCCTAATTTAACCTTAGGACCAGTAGAGGGGAATGTTGTGTGCTACTAATGTTTGTGTGTGAGTGTGTTGCTTCAAAATTAAGAATGGTTGGAA

>IR72

TTCTTGTCATCTAATTGCAGGTTAGTTGTAAAATGTAAAATCGAATTGGACATTTTGAACCAGGTCATGGATTAATTGATTAAGATGCTAGAAGAAATTAACAAGCTGTGCCATGCAATATATCATGCATGCATGCATGAATATGATGGCTAAGTAGGTACTAATGCTAATATAGAAGAGAGAGAGAGAGAGAGAGAGAGAGAGAGAGAGAGAGAGATCATCTGCCTAAGTACATATTTGAAGAAGCTCTACTTAATTAACTAGAAATGGCGCCAAGCCACTCTTCTTGTTCGATCTACTGCTAGCTGCTGCTGCTGCTGCTGCTATACTACTCGATCTCTTGCTCGATCGATCAAACGCAGATTGATCAAGATCAACTCGATCTGATCATGGTAGACAGGAAATGATATATGCATGATCGCTCAGAGGCAAAGTGCGTGATTAGCCATGCAATGCCCGGTGCAACTCGATCAATGGGAGAGGAAGCTGAATGGAGAGTAGGAGTCGGAGCCCTGCGACGAGGCGACCATGTCGGCGGCGCCGCCGCTCGCCGGGAACCCGCAGGCGCCGAGCTGGTCCGCCGCGTCGCCGCCGCCCCAGAAGCCGGCGACCATCTGCGCGAGGTCGTCGACGTCCTCCCGGAGCCCCATCATGCCGTAGGCGTCGGCGTCGGAGTAGCGCCGCATGTCCTGATGATCGGCCGCGGCGCCGCCGCCCCTCGGCCGGAGGCAGCTCTCCGGCACCACGCTGCTCAGGTACCCGGAGTTGTCGTCGGCGCCGGAGAAGAGGAAGTCGTGGCCGTTCCTGTCCATGTCCAGCAGCGACGACGACATGCTGGAGCGGTGGGGATCAACCGGGACCATCACCGGCATCGTCGAGCACTCGCCCACCGACGACGCGCCCGACGCCGCGCCATGTCCGTGGTGGTGGTGGTGGTGGTGGTGGTGACCGTACGAGCCAATGTGCGGCGCCGCGCCCACGCCGCCGCCGTACTGCACCGAGGACGGCGCGGCGGCGGCAGCGGCGTACTGCGGCGCGTGGAACGGCGCGAGGAACGGCGGGTAGTTGTAGGCGGCGTGGGTGTAGACGAAGTTGGTGCGCGCCTGGGCGCCCTTCATGGACAGCGCGGCGCGGTCGTACGCCAGCGCCGCCTCCTGCGCCGTGTCGAACGTGCCCAGCCAGTGCCGCTCCTTGGTGGTCGGGTCGCGTATCTCGGCAGCGTACCTCCCCCACGGCCGCCGCCGCACGCCGAGGAACCTCCCTGGCTCCTGCGCGCGCCGCCTGCTGCGCCCCGACGGCGGCCGCTCGCTCATCGGCGACGACGGCGGCGACGGCTGGCTCGCCGGCTTCGGCGGCTCCGAGAACGCCATCAGGCTGGCCTGGCTGCTGCTGCTGCTGCTGCTACTGCCGCTGCCTCGAGTGTTCATGACCAATGCAATATTGCAATATTGCAATGCAATGCAAGAGTGAGAGTGAGAGTGAGCTAGGCTTTAGCTAAGCTAAGGTATATGAATGAGCTCGAGCTAAGCTTAGCTTGTGTGTAGTGCTCAAATGGGAGGGATTCAAGGGTGGTATTTAAATGGGTCTTGGAGAGAGAGGTCACTGTGGATGAGATGGCAGAGAGGGGTGGCATGCATGCACTGCACTTGTGTTAGCTAGACCTATAGCTGCATCATATCAAGGTTAGTTTGTAAGTATTCATCTTGTTTTCCAATGTGAGGTTTGGATTTGTGTGCCCTAATTTAACCTTAGGACCAGTAGAGGGGAATGTTGTGTGCTACTAATGTTTGTGTGTGAGTGTGTTGCTTCAAAATTAAGAATGGTTGGA

>IR61608-3B-20-2-2-1-2

TTCTTGTCATCTAATTGCAGGTTAGTTGTAAAATGTAAAATCGAATTGGACATTTTGAACCAGGTCATGGATTAATTGATTAAGATGCTAGAAGAAATTAACAAGCTGTGCCATGCAATATATCATGCATGCATGCATGAATATGATGGCTAAGTAGGTACTAATGCTAATATAGAAGAGAGAGAGAGAGAGAGAGATCATCTGCCTAAGTACATATTTGAAGAAGCTCTACTTAATTAACTAGAAATGGCGCCAAGCCACTCTTCTTGTTCGATCTACTGCTAGCTGCTGCTGCTGCTGATGCTATACTACTCGATCTCTTGCTCGATCGATCAAACGCAGATTGATCAAGATCAACTCGATCTGATCATGGTAGACAGGAAATGATATATGCATGATCGCTCAGAGGCAAAGTGCGTGATTAGCCATGCAATGCCCGGTGCAACTCGATCAATGGGAGAGGAAGCTGAATGGAGAGTAGGAGTCGGAGCCCTGCGACGAGGCGACCATGTCGGCGGCGCCGCCGCTCGCCGGGAACCCGCAGGCGCCGAGCTGGTCCGCCGCGTCGCCGCCGCCCCAGAAGCCGGCGACCATCTGCGCGAGGTCGTCGACGTCCTCCCGGAGCCCCATCATGCCGTAGGCGTCGGCGTCGGAGTAGCGCCGCATGTCCTGATGATCGGCCGTGGCGCCGCCGCCCCTCGGCCGGAGGCAGCTCTCCGGCACCACGCTGCTCAGGTACCCGGAGTTGTCGTCGGCGCCGGAGAAGAGGAAGTCGTGGCCGTTCCTGTCCATGTCCAGCAGCGACGACGACATGCTGGAGCGGTGGGGATCAACCGGGACCATCACCGGCATCGTCGAGCACTCGCCCACCGACGACGCGCCCGACGCCGCGCCATGTCCGTGGTGGTGGTGGTGGTGGTGGTGGTGACCGTACGAGCCAATGTGCGGCGCCGCGCCCACGCCGCCGCCGTACTGCACCGAGGACGGCGCGGCGGCGGCGGCGGCGTACTGCGGCGCGTGGAACGGCGCGAGGAACGGCGGGTAGTTGTAGGCGGCGTGGGTGTAGACGAAGTTGGTGCGCGCCTGGGCGCCCTTCATGGACAGCGCGGCGCGGTCGTACGCCAGCGCCGCCTCCTGCGCCGTGTCGAACGTGCCCAGCCAGTGCCGCTCCTTGGTGGTCGGGTCGCGTATCTCGGCGGCGTACCTCCCCCACGGCCGCCGCCGCACGCCGAGGAACCTCCCGGGCTCCTGCGCGCGCCGCCTGCTGCGCCCCGACGGCGGCCGCTCGCTCATCGGCGACGACGGCGGCGACGGCTGGCTCGCCGGCTTCGGCGGCTCCGAGAACGCCATCAGGCTGGCCTGGCTGCTGCTGCTGCTGCTGCTACTGCCGCTGCCTCGAGTGTTCATGACCAATGCAATATTGCAATATTGCAATGCAATGCAAGAGTGAGAGTGAGAGTGAGCTAGGCTTTAGCTAAGCTAAGGTATATGAATGAGCTCGAGCTAAGCTTAGCTTGTGTGTAGTGCTCAAATGGGAGGGATGCAAGGGTGGTATTTAAATGGGTCTTGGAGAGAGAGGTCACTGTGGATGAGATGGCAGAGAGGGGTGGCATGCATGCACTGCACATGTGTTAGCTAGACCTATAGCTGCATCATATCAAGGTTAGTTTGTAAGTATTCATCTTGTTTTCCAATGTGAGGTTTGGATTTGTGTGCCCTAATTTAACCTTAGGACCAGTAGAGGGGAATGTTGTGTGCTACTAATGTTTGTGTGTGAGTGTGTTGCTTCAAAATTAAGAATGGTTGGAA

>IRBB 60

TTCTTGTCATCTAATTGCAGGTTAGTTGTAAAATGTAAAATCGAATTGGACATTTTGAACCAGGTCATGGATTAATTGATTAAGATGCTAGAAGAAATTAACAAGCTGTGCCATGCAATATATCATGCATGCATGCATGAATATGATGGCTAAGTAGGTACTAATGCTAATATAGAAGAGAGAGAGAGAGAGAGAGAGAGAGAGAGAGAGAGAGAGATCATCTGCCTAAGTACATATTTGAAGAAGCTCTACTTAATTAACTAGAAATGGCGCCAAGCCACTCTTCTTGTTCGATCTACTGCTAGCTGCTGCTGCTGCTGCTGCTATACTACTCGATCTCTTGCTCGATCGATCAAACGCAGATTGATCAAGATCAACTCGATCTGATCATGGTAGACAGGAAATGATATATGCATGATCGCTCAGAGGCAAAGTGCGTGATTAGCCATGCAATGCCCGGTGCAACTCGATCAATGGGAGAGGAAGCTGAATGGAGAGTAGGAGTCGGAGCCCTGCGACGAGGCGACCATGTCGGCGGCGCCGCCGCTCGCCGGGAACCCGCAGGCGCCGAGCTGGTCCGCCGCGTCGCCGCCGCCCCAGAAGCCGGCGACCATCTGCGCGAGGTCGTCGACGTCCTCCCGGAGCCCCATCATGCCGTAGGCGTCGGCGTCGGAGTAGCGCCGCATGTCCTGATGATCGGCCGCGGCGCCGCCGCCCCTCGGCCGGAGGCAGCTCTCCGGCACCACGCTGCTCAGGTACCCGGAGTTGTCGTCGGCGCCGGAGAAGAGGAAGTCGTGGCCGTTCCTGTCCATGTCCAGCAGCGACGACGACATGCTGGAGCGGTGGGGATCAACCGGGACCATCACCGGCATCGTCGAGCACTCGCCCACCGACGACGCGCCCGACGCCGCGCCATGTCCGTGGTGGTGGTGGTGGTGGTGGTGGTGACCGTACGAGCCAATGTGCGGCGCCGCGCCCACGCCGCCGCCGTACTGCACCGAGGACGGCGCGGCGGCGGCAGCGGCGTACTGCGGCGCGTGGAACGGCGCGAGGAACGGCGGGTAGTTGTAGGCGGCGTGGGTGTAGACGAAGTTGGTGCGCGCCTGGGCGCCCTTCATGGACAGCGCGGCGCGGTCGTACGCCAGCGCCGCCTCCTGCGCCGTGTCGAACGTGCCCAGCCAGTGCCGCTCCTTGGTGGTCGGGTCGCGTATCTCGGCAGCGTACCTCCCCCACGGCCGCCGCCGCACGCCGAGGAACCTCCCTGGCTCCTGCGCGCGCCGCCTGCTGCGCCCCGACGGCGGCCGCTCGCTCATCGGCGACGACGGCGGCGACGGCTGGCTCGCCGGCTTCGGCGGCTCCGAGAACGCCATCAGGCTGGCCTGGCTGCTGCTGCTGCTGCTGCTACTGCCGCTGCCTCGAGTGTTCATGACCAATGCAATATTGCAATATTGCAATGCAATGCAAGAGTGAGAGTGAGAGTGAGCTAGGCTTTAGCTAAGCTAAGGTATATGAATGAGCTCGAGCTAAGCTTAGCTTGTGTGTAGTGCTCAAATGGGAGGGATTCAAGGGTGGTATTTAAATGGGTCTTGGAGAGAGAGGTCACTGTGGATGAGATGGCAGAGAGGGGTGGCATGCATGCACTGCACTTGTGTTAGCTAGACCTATAGCTGCATCATATCAAGGTTAGTTTGTAAGTATTCATCTTGTTTTCCAATGTGAGGTTTGGATTTGTGTGCCCTAATTTAACCTTAGGACCAGTAGAGGGGAATGTTGTGTGCTACTAATGTTTGTGTGTGAGTGTGTTGCTTCAAAATTAAGAATGGTTGGAA

>Bordagal

TTCTTGTCATCTAATTGCAGGTTAGTTGTAAAATGTAAAATCGAATTGGACATTTTGAACCAGGTCATGGATTAATTGATTAAGATGCTAGAAGAAATTAACAAGCTGTGCCATGCAATATATCATGCATGCATGCATGAATATGATGGCTAAGTAGGTACTAATGCTAATATAGAAGAGAGAGAGAGAGAGAGAGAGAGAGAGAGAGAGAGAGAGAGATCATCTGCCTAAGTACATATTTGAAGAAGCTCTACTTAATTAACTAGAAATGGCGCCAAGCCACTCTTCTTGTTCGATCTACTGCTAGCTGCTGCTGCTGCTGCTGCTATACTACTCGATCTCTTGCTCGATCGATCAAACGCAGATTGATCAAGATCAACTCGATCTGATCATGGTAGACAGGAAATGATATATGCATGATCGCTCAGAGGCAAAGTGCGTGATTAGCCATGCAATGCCCGGTGCAACTCGATCAATGGGAGAGGAAGCTGAATGGAGAGTAGGAGTCGGAGCCCTGCGACGAGGCGACCATGTCGGCGGCGCCGCCGCTCGCCGGGAACCCGCAGGCGCCGAGCTGGTCCGCCGCGTCGCCGCCGCCCCAGAAGCCGGCGACCATCTGCGCGAGGTCGTCGACGTCCTCCCGGAGCCCCATCATGCCGTAGGCGTCGGCGTCGGAGTAGCGCCGCATGTCCTGATGATCGGCCGCGGCGCCGCCGCCCCTCGGCCGGAGGCAGCTCTCCGGCACCACGCTGCTCAGGTACCCGGAGTTGTCGTCGGCGCCGGAGAAGAGGAAGTCGTGGCCGTTCCTGTCCATGTCCAGCAGCGACGACGACATGCTGGAGCGGTGGGGATCAACCGGGACCATCACCGGCATCGTCGAGCACTCGCCCACCGACGACGCGCCCGACGCCGCGCCATGTCCGTGGTGGTGGTGGTGGTGGTGGTGGTGACCGTACGAGCCAATGTGCGGCGCCGCGCCCACGCCGCCGCCGTACTGCACCGAGGACGGCGCGGCGGCGGCAGCGGCGTACTGCGGCGCGTGGAACGGCGCGAGGAACGGCGGGTAGTTGTAGGCGGCGTGGGTGTAGACGAAGTTGGTGCGCGCCTGGGCGCCCTTCATGGACAGCGCGGCGCGGTCGTACGCCAGCGCCGCCTCCTGCGCCGTGTCGAACGTGCCCAGCCAGTGCCGCTCCTTGGTGGTCGGGTCGCGTATCTCGGCAGCGTACCTCCCCCACGGCCGCCGCCGCACGCCGAGGAACCTCCCTGGCTCCTGCGCGCGCCGCCTGCTGCGCCCCGACGGCGGCCGCTCGCTCATCGGCGACGACGGCGGCGACGGCTGGCTCGCCGGCTTCGGCGGCTCCGAGAACGCCATCAGGCTGGCCTGGCTGCTGCTGCTGCTGCTGCTACTGCCGCTGCCTCGAGTGTTCATGACCAATGCAATATTGCAATATTGCAATGCAATGCAAGAGTGAGAGTGAGAGTGAGCTAGGCTTTAGCTAAGCTAAGGTATATGAATGAGCTCGAGCTAAGCTTAGCTTGTGTGTAGTGCTCAAATGGGAGGGATTCAAGGGTGGTATTTAAATGGGTCTTGGAGAGAGAGGTCACTGTGGATGAGATGGCAGAGAGGGGTGGCATGCATGCACTGCACTTGTGTTAGCTAGACCTATAGCTGCATCATATCAAGGTTAGTTTGTAAGTATTCATCTTGTTTTCCAATGTGAGGTTTGGATTTGTGTGCCCTAATTTAACCTTAGGACCAGTAGAGGGGAATGTTGTGTGCTACTAATGTTTGTGTGTGAGTGTGTTGCTTCAAAATTAAGAATGGTTGGAA

>Lemont

TTCTTGTCATCTAATTGCAGGTTAGTTGTAAAATGTAAAATCGAATTGGACATTTTGAACCAGGTCATGGATTAATTGATTAAGATGCTAGAAGAAATTAACAAGCTGTGCCATGCAATATATCATGCATGCATGCATGAATATGATGGCTAAGTAGGTACTAATGCTAATATAGAAGAGAGAGAGAGAGAGAGAGAGAGAGAGAGAGAGAGAGAGAGATCATCTGCCTAAGTACATATTTGAAGAAGCTCTACTTAATTAACTAGAAATGGCGCCAAGCCACTCTTCTTGTTCGATCTACTGCTAGCTGCTGCTGCTGCTGCTGCTATACTACTCGATCTCTTGCTCGATCGATCAAACGCAGATTGATCAAGATCAACTCGATCTGATCATGGTAGACAGGAAATGATATATGCATGATCGCTCAGAGGCAAAGTGCGTGATTAGCCATGCAATGCCCGGTGCAACTCGATCAATGGGAGAGGAAGCTGAATGGAGAGTAGGAGTCGGAGCCCTGCGACGAGGCGACCATGTCGGCGGCGCCGCCGCTCGCCGGGAACCCGCAGGCGCCGAGCTGGTCCGCCGCGTCGCCGCCGCCCCAGAAGCCGGCGACCATCTGCGCGAGGTCGTCGACGTCCTCCCGGAGCCCCATCATGCCGTAGGCGTCGGCGTCGGAGTAGCGCCGCATGTCCTGATGATCGGCCGCGGCGCCGCCGCCCCTCGGCCGGAGGCAGCTCTCCGGCACCACGCTGCTCAGGTACCCGGAGTTGTCGTCGGCGCCGGAGAAGAGGAAGTCGTGGCCGTTCCTGTCCATGTCCAGCAGCGACGACGACATGCTGGAGCGGTGGGGATCAACCGGGACCATCACCGGCATCGTCGAGCACTCGCCCACCGACGACGCGCCCGACGCCGCGCCATGTCCGTGGTGGTGGTGGTGGTGGTGGTGGTGACCGTACGAGCCAATGTGCGGCGCCGCGCCCACGCCGCCGCCGTACTGCACCGAGGACGGCGCGGCGGCGGCAGCGGCGTACTGCGGCGCGTGGAACGGCGCGAGGAACGGCGGGTAGTTGTAGGCGGCGTGGGTGTAGACGAAGTTGGTGCGCGCCTGGGCGCCCTTCATGGACAGCGCGGCGCGGTCGTACGCCAGCGCCGCCTCCTGCGCCGTGTCGAACGTGCCCAGCCAGTGCCGCTCCTTGGTGGTCGGGTCGCGTATCTCGGCAGCGTACCTCCCCCACGGCCGCCGCCGCACGCCGAGGAACCTCCCTGGCTCCTGCGCGCGCCGCCTGCTGCGCCCCGACGGCGGCCGCTCGCTCATCGGCGACGACGGCGGCGACGGCTGGCTCGCCGGCTTCGGCGGCTCCGAGAACGCCATCAGGCTGGCCTGGCTGCTGCTGCTGCTGCTGCTACTGCCGCTGCCTCGAGTGTTCATGACCAATGCAATATTGCAATATTGCAATGCAATGCAAGAGTGAGAGTGAGAGTGAGCTAGGCTTTAGCTAAGCTAAGGTATATGAATGAGCTCGAGCTAAGCTTAGCTTGTGTGTAGTGCTCAAATGGGAGGGATTCAAGGGTGGTATTTAAATGGGTCTTGGAGAGAGAGGTCACTGTGGATGAGATGGCAGAGAGGGGTGGCATGCATGCACTGCACTTGTGTTAGCTAGACCTATAGCTGCATCATATCAAGGTTAGTTTGTAAGTATTCATCTTGTTTTCCAATGTGAGGTTTGGATTTGTGTGCCCTAATTTAACCTTAGGACCAGTAGAGGGGAATGTTGTGTGCTACTAATGTTTGTGTGTGAGTGTGTTGCTTCAAAATTAAGAATGGTTGGAA

>Khao-lo-1

TTCTTGTCATCTAATTGCAGGTTAGTTGTAAAATGTAAAATCGAATTGGACATTTTGAACCAGGTCATGGATTAATTGATTAAGATGCTAGAAGAAATTAACAAGCTGTGCCATGCAATATATCATGCATGCATGCATGAATATGATGGCTAAGTAGGTACTAATGCTAATATAGAAGAGAGAGAGAGAGAGAGAGAGAGAGAGAGAGAGAGAGAGATCATCTGCCTAAGTACATATTTGAAGAAGCTCTACTTAATTAACTAGAAATGGCGCCAAGCCACTCTTCTTGTTCGATCTACTGCTAGCTGCTGCTGCTGCTGCTGCTATACTACTCGATCTCTTGCTCGATCGATCAAACGCAGATTGATCAAGATCAACTCGATCTGATCATGGTAGACAGGAAATGATATATGCATGATCGCTCAGAGGCAAAGTGCGTGATTAGCCATGCAATGCCCGGTGCAACTCGATCAATGGGAGAGGAAGCTGAATGGAGAGTAGGAGTCGGAGCCCTGCGACGAGGCGACCATGTCGGCGGCGCCGCCGCTCGCCGGGAACCCGCAGGCGCCGAGCTGGTCCGCCGCGTCGCCGCCGCCCCAGAAGCCGGCGACCATCTGCGCGAGGTCGTCGACGTCCTCCCGGAGCCCCATCATGCCGTAGGCGTCGGCGTCGGAGTAGCGCCGCATGTCCTGATGATCGGCCGCGGCGCCGCCGCCCCTCGGCCGGAGGCAGCTCTCCGGCACCACGCTGCTCAGGTACCCGGAGTTGTCGTCGGCGCCGGAGAAGAGGAAGTCGTGGCCGTTCCTGTCCATGTCCAGCAGCGACGACGACATGCTGGAGCGGTGGGGATCAACCGGGACCATCACCGGCATCGTCGAGCACTCGCCCACCGACGACGCGCCCGACGCCGCGCCATGTCCGTGGTGGTGGTGGTGGTGGTGGTGGTGACCGTACGAGCCAATGTGCGGCGCCGCGCCCACGCCGCCGCCGTACTGCACCGAGGACGGCGCGGCGGCGGCAGCGGCGTACTGCGGCGCGTGGAACGGCGCGAGGAACGGCGGGTAGTTGTAGGCGGCGTGGGTGTAGACGAAGTTGGTGCGCGCCTGGGCGCCCTTCATGGACAGCGCGGCGCGGTCGTACGCCAGCGCCGCCTCCTGCGCCGTGTCGAACGTGCCCAGCCAGTGCCGCTCCTTGGTGGTCGGGTCGCGTATCTCGGCAGCGTACCTCCCCCACGGCCGCCGCCGCACGCCGAGGAACCTCCCTGGCTCCTGCGCGCGCCGCCTGCTGCGCCCCGACGGCGGCCGCTCGCTCATCGGCGACGACGGCGGCGACGGCTGGCTCGCCGGCTTCGGCGGCTCCGAGAACGCCATCAGGCTGGCCTGGCTGCTGCTGCTGCTGCTGCTACTGCCGCTGCCTCGAGTGTTCATGACCAATGCAATATTGCAATATTGCAATGCAATGCAAGAGTGAGAGTGAGAGTGAGCTAGGCTTTAGCTAAGCTAAGGTATATGAATGAGCTCGAGCTAAGCTTAGCTTGTGTGTAGTGCTCAAATGGGAGGGATTCAAGGGTGGTATTTAAATGGGTCTTGGAGAGAGAGGTCACTGTGGATGAGATGGCAGAGAGGGGTGGCATGCATGCACTGCACTTGTGTTAGCTAGACCTATAGCTGCATCATATCAAGGTTAGTTTGTAAGTATTCATCTTGTTTTCCAATGTGAGGTTTGGATTTGTGTGCCCTAATTTAACCTTAGGACCAGTAGAGGGGAATGTTGTGTGCTACTAATGTTTGTGTGTGAGTGTGTTGCTTCAAAATTAAGAATGGTTGGAA

>Ku79-2

TTCTTGTCATCTAATTGCAGGTTAGTTGTAAAATGTAAAATCGAATTGGACATTTTGAACCAGGTCATGGATTAATTGATTAAGATGCTAGAAGAAATTAACAAGCTGTGCCATGCAATATATCATGCATGCATGCATGAATATGATGGCTAAGTAGGTACTAATGCTAATATAGAAGAGAGAGAGAGAGAGAGAGAGAGAGAGAGAGAGAGAGAGATCATCTGCCTAAGTACATATTTGAAGAAGCTCTACTTAATTAACTAGAAATGGCGCCAAGCCACTCTTCTTGTTCGATCTACTGCTAGCTGCTGCTGCTGCTGCTGCTATACTACTCGATCTCTTGCTCGATCGATCAAACGCAGATTGATCAAGATCAACTCGATCTGATCATGGTAGACAGGAAATGATATATGCATGATCGCTCAGAGGCAAAGTGCGTGATTAGCCATGCAATGCCCGGTGCAACTCGATCAATGGGAGAGGAAGCTGAATGGAGAGTAGGAGTCGGAGCCCTGCGACGAGGCGACCATGTCGGCGGCGCCGCCGCTCGCCGGGAACCCGCAGGCGCCGAGCTGGTCCGCCGCGTCGCCGCCGCCCCAGAAGCCGGCGACCATCTGCGCGAGGTCGTCGACGTCCTCCCGGAGCCCCATCATGCCGTAGGCGTCGGCGTCGGAGTAGCGCCGCATGTCCTGATGATCGGCCGCGGCGCCGCCGCCCCTCGGCCGGAGGCAGCTCTCCGGCACCACGCTGCTCAGGTACCCGGAGTTGTCGTCGGCGCCGGAGAAGAGGAAGTCGTGGCCGTTCCTGTCCATGTCCAGCAGCGACGACGACATGCTGGAGCGGTGGGGATCAACCGGGACCATCACCGGCATCGTCGAGCACTCGCCCACCGACGACGCGCCCGACGCCGCGCCATGTCCGTGGTGGTGGTGGTGGTGGTGGTGGTGACCGTACGAGCCAATGTGCGGCGCCGCGCCCACGCCGCCGCCGTACTGCACCGAGGACGGCGCGGCGGCGGCAGCGGCGTACTGCGGCGCGTGGAACGGCGCGAGGAACGGCGGGTAGTTGTAGGCGGCGTGGGTGTAGACGAAGTTGGTGCGCGCCTGGGCGCCCTTCATGGACAGCGCGGCGCGGTCGTACGCCAGCGCCGCCTCCTGCGCCGTGTCGAACGTGCCCAGCCAGTGCCGCTCCTTGGTGGTCGGGTCGCGTATCTCGGCAGCGTACCTCCCCCACGGCCGCCGCCGCACGCCGAGGAACCTCCCTGGCTCCTGCGCGCGCCGCCTGCTGCGCCCCGACGGCGGCCGCTCGCTCATCGGCGACGACGGCGGCGACGGCTGGCTCGCCGGCTTCGGCGGCTCCGAGAACGCCATCAGGCTGGCCTGGCTGCTGCTGCTGCTGCTGCTACTGCCGCTGCCTCGAGTGTTCATGACCAATGCAATATTGCAATATTGCAATGCAATGCAAGAGTGAGAGTGAGAGTGAGCTAGGCTTTAGCTAAGCTAAGGTATATGAATGAGCTCGAGCTAAGCTTAGCTTGTGTGTAGTGCTCAAATGGGAGGGATTCAAGGGTGGTATTTAAATGGGTCTTGGAGAGAGAGGTCACTGTGGATGAGATGGCAGAGAGGGGTGGCATGCATGCACTGCACTTGTGTTAGCTAGACCTATAGCTGCATCATATCAAGGTTAGTTTGTAAGTATTCATCTTGTTTTCCAATGTGAGGTTTGGATTTGTGTGCCCTAATTTAACCTTAGGACCAGTAGAGGGGAATGTTGTGTGCTACTAATGTTTGTGTGTGAGTGTGTTGCTTCAAAATTAAGAATGGTTGGAA

>Hung-Mi-Hsiang-Ma-Tsam

TTCTTGTCATCTAATTGCAGGTTAGTTGTAAAATGTAAAATCGAATTGGACATTTTGAACCAGGTCATGGATTAATTGATTAAGATGCTAGAAGAAATTAACAAGCTGTGCCATGCAATATATCATGCATGCATGCATGAATATGATGGCTAAGTAGGTACTAATGCTAATATAGAAGAGAGAGAGAGAGAGAGAGAGAGAGAGAGAGAGAGAGAGAGATCATCTGCCTAAGTACATATTTGAAGAAGCTCTACTTAATTAACTAGAAATGGCGCCAAGCCACTCTTCTTGTTCGATCTACTGCTAGCTGCTGCTGCTGCTGCTGCTATACTACTCGATCTCTTGCTCGATCGATCAAACGCAGATTGATCAAGATCAACTCGATCTGATCATGGTAGACAGGAAATGATATATGCATGATCGCTCAGAGGCAAAGTGCGTGATTAGCCATGCAATGCCCGGTGCAACTCGATCAATGGGAGAGGAAGCTGAATGGAGAGTAGGAGTCGGAGCCCTGCGACGAGGCGACCATGTCGGCGGCGCCGCCGCTCGCCGGGAACCCGCAGGCGCCGAGCTGGTCCGCCGCGTCGCCGCCGCCCCAGAAGCCGGCGACCATCTGCGCGAGGTCGTCGACGTCCTCCCGGAGCCCCATCATGCCGTAGGCGTCGGCGTCGGAGTAGCGCCGCATGTCCTGATGATCGGCCGCGGCGCCGCCGCCCCTCGGCCGGAGGCAGCTCTCCGGCACCACGCTGCTCAGGTACCCGGAGTTGTCGTCGGCGCCGGAGAAGAGGAAGTCGTGGCCGTTCCTGTCCATGTCCAGCAGCGACGACGACATGCTGGAGCGGTGGGGATCAACCGGGACCATCACCGGCATCGTCGAGCACTCGCCCACCGACGACGCGCCCGACGCCGCGCCATGTCCGTGGTGGTGGTGGTGGTGGTGGTGGTGACCGTACGAGCCAATGTGCGGCGCCGCGCCCACGCCGCCGCCGTACTGCACCGAGGACGGCGCGGCGGCGGCAGCGGCGTACTGCGGCGCGTGGAACGGCGCGAGGAACGGCGGGTAGTTGTAGGCGGCGTGGGTGTAGACGAAGTTGGTGCGCGCCTGGGCGCCCTTCATGGACAGCGCGGCGCGGTCGTACGCCAGCGCCGCCTCCTGCGCCGTGTCGAACGTGCCCAGCCAGTGCCGCTCCTTGGTGGTCGGGTCGCGTATCTCGGCAGCGTACCTCCCCCACGGCCGCCGCCGCACGCCGAGGAACCTCCCTGGCTCCTGCGCGCGCCGCCTGCTGCGCCCCGACGGCGGCCGCTCGCTCATCGGCGACGACGGCGGCGACGGCTGGCTCGCCGGCTTCGGCGGCTCCGAGAACGCCATCAGGCTGGCCTGGCTGCTGCTGCTGCTGCTGCTACTGCCGCTGCCTCGAGTGTTCATGACCAATGCAATATTGCAATATTGCAATGCAATGCAAGAGTGAGAGTGAGAGTGAGCTAGGCTTTAGCTAAGCTAAGGTATATGAATGAGCTCGAGCTAAGCTTAGCTTGTGTGTAGTGCTCAAATGGGAGGGATTCAAGGGTGGTATTTAAATGGGTCTTGGAGAGAGAGGTCACTGTGGATGAGATGGCAGAGAGGGGTGGCATGCATGCACTGCACTTGTGTTAGCTAGACCTATAGCTGCATCATATCAAGGTTAGTTTGTAAGTATTCATCTTGTTTTCCAATGTGAGGTTTGGATTTGTGTGCCCTAATTTAACCTTAGGACCAGTAGAGGGGAATGTTGTGTGCTACTAATGTTTGTGTGTGAGTGTGTTGCTTCAAAATTAAGAATGGTTGGAA

>Warisan mochi 2

TTCTTGTCATCTAATTGCAGGTTAGTTGTAAAATGTAAAATCGAATTGGACATTTTGAACCAGGTCATGGATTAATTGATTAAGATGCTAGAAGAAATTAACAAGCTGTGCCATGCAATATATCATGCATGCATGCATGAATATGCATGATGGCTAAGTAGGTACTAATGCTAATATAGAAGAGAGAGAGAGAGAGAGAGAGAGAGAGAGATCATCTGCCTAAGTACATATTTGAAGAAGCTCTACTTAATTAACTAGAAATGGCGCCAAGCCACTCTTCTTGTTCGATCTACTGCTAGCTGCTGCTGCTGCTGCTGCTATACTACTCGATCTCTTGCTCGATCGATCAAACGCAGATTGATCAAGATCAACTCGATCTGATCATGGTAGACAGGAAATGATATATGCATGATCGCTCAGAGGCAAAGTGCGTGATTAGCCATGCAATGCCCGGTGCAACTCGATCAATGGGAGAGGAAGCTGAATGGAGAGTAGGAGTCGGAGCCCTGCGACGAGGCGACCATGTCGGCGGCGCCGCCGCTCGCCGGGAACCCGCAGGCGCCGAGCTGGTCCGCCGCGTCGCCGCCGCCCCAGAAGCCGGCGACCATCTGCGCGAGGTCGTCGACGTCCTCCCGGAGCCCCATCATGCCGTAGGCGTCGGCGTCGGAGTAGCGCCGCATGTCCTGATGATCGGCCGCGGCGCCGCCGCCCCTCGGCCGGAGGCAGCTCTCCGGCACCACGCTGCTCAGGTACCCGGAGTTGTCGTCGGCGCCGGAGAAGAGGAAGTCGTGGCCGTTCCTGTCCATGTCCAGCAGCGACGACGACATGCTGGAGCGGTGGGGATCAACCGGGACCATCACCGGCATCGTCGAGCACTCGCCCACCGACGACGCGCCCGACGCCGCGCCATGTCCGTGGTGGTGGTGGTGGTGGTGGTGGTGACCGTACGAGCCAATGTGCGGCGCCGCGCCCACGCCGCCGCCGTACTGCACCGAGGACGGCGCGGCGGCGGCAGCGGCGTACTGCGGCGCGTGGAACGGCGCGAGGAACGGCGGGTAGTTGTAGGCAGCGTGGGTGTAGACGAAGTTGGTGCGCGCCTGGGCGCCCTTCATGGACAGCGCGGCGCGGTCGTACGCCAGCGCCGCCTCCTGCGCCGTGTCGAACGTGCCCAGCCAGTGCCGCTCCTTGGTGGTCGGGTCGCGTATCTCGGCAGCGTACCTCCCCCACGGCCGCCGCCGCACGCCGAGGAACCTCCCTGGCTCCTGCGCGCGCCGCCTGCTGCGCCCCGACGGCGGCCGCTCGCTCATCGGCGACGACGGCGGCGACGGCTGGCTCGCCGGCTTCGGCGGCTCCGAGAACGCCATCAGGCTGGCCTGGCTGCTGCTGCTGCTGCTGCTACTGCCGCTGCCTCGAGTGTTCATGACCAATGCAATATTGCAATATTGCAATGCAATGCAAGAGTGAGAGTGAGAGTGAGCTAGGCTTTAGCTAAGCTAAGGTATATGAATGAGCTCGAGCTAAGCTTAGCTTGTGTGTAGTGCTCAAATGGGAGGGATTCAAGGGTGGTATTTAAATGGGTCTTGGAGAGAGAGGTCACTGTGGATGAGATGGCAGAGAGGGGTGGCATGCATGCACTGCACTTGTGTTAGCTAGACCTATAGCTGCATCATATCAAGGTTAGTTTGTAAGTATTCATCTTGTTTTCCAATGTGAGGTTTGGATTTGTGTGCCCTAATTTAACCTTAGGACCAGTAGAGGGGAATGTTGTGTGCTACTAATGTTTGTGTGTGAGTGTGTTGCTTCAAAATTAAGAATGGTTGGAA

>Aromatic Lemont

TTCTTGTCATCTAATTGCAGGTTAGTTGTAAAATGTAAAATCGAATTGGACATTTTGAACCAGGTCATGGATTAATTGATTAAGATGCTAGAAGAAATTAACAAGCTGTGCCATGCAATATATCATGCATGCATGCATGAATATGATGGCTAAGTAGGTACTAATGCTAATATAGAAGAGAGAGAGAGAGAGAGAGAGAGAGAGAGAGAGAGAGAGATCATCTGCCTAAGTACATATTTGAAGAAGCTCTACTTAATTAACTAGAAATGGCGCCAAGCCACTCTTCTTGTTCGATCTACTGCTAGCTGCTGCTGCTGCTGCTGCTATACTACTCGATCTCTTGCTCGATCGATCAAACGCAGATTGATCAAGATCAACTCGATCTGATCATGGTAGACAGGAAATGATATATGCATGATCGCTCAGAGGCAAAGTGCGTGATTAGCCATGCAATGCCCGGTGCAACTCGATCAATGGGAGAGGAAGCTGAATGGAGAGTAGGAGTCGGAGCCCTGCGACGAGGCGACCATGTCGGCGGCGCCGCCGCTCGCCGGGAACCCGCAGGCGCCGAGCTGGTCCGCCGCGTCGCCGCCGCCCCAGAAGCCGGCGACCATCTGCGCGAGGTCGTCGACGTCCTCCCGGAGCCCCATCATGCCGTAGGCGTCGGCGTCGGAGTAGCGCCGCATGTCCTGATGATCGGCCGCGGCGCCGCCGCCCCTCGGCCGGAGGCAGCTCTCCGGCACCACGCTGCTCAGGTACCCGGAGTTGTCGTCGGCGCCGGAGAAGAGGAAGTCGTGGCCGTTCCTGTCCATGTCCAGCAGCGACGACGACATGCTGGAGCGGTGGGGATCAACCGGGACCATCACCGGCATCGTCGAGCACTCGCCCACCGACGACGCGCCCGACGCCGCGCCATGTCCGTGGTGGTGGTGGTGGTGGTGGTGGTGACCGTACGAGCCAATGTGCGGCGCCGCGCCCACGCCGCCGCCGTACTGCACCGAGGACGGCGCGGCGGCGGCAGCGGCGTACTGCGGCGCGTGGAACGGCGCGAGGAACGGCGGGTAGTTGTAGGCGGCGTGGGTGTAGACGAAGTTGGTGCGCGCCTGGGCGCCCTTCATGGACAGCGCGGCGCGGTCGTACGCCAGCGCCGCCTCCTGCGCCGTGTCGAACGTGCCCAGCCAGTGCCGCTCCTTGGTGGTCGGGTCGCGTATCTCGGCAGCGTACCTCCCCCACGGCCGCCGCCGCACGCCGAGGAACCTCCCTGGCTCCTGCGCGCGCCGCCTGCTGCGCCCCGACGGCGGCCGCTCGCTCATCGGCGACGACGGCGGCGACGGCTGGCTCGCCGGCTTCGGCGGCTCCGAGAACGCCATCAGGCTGGCCTGGCTGCTGCTGCTGCTGCTGCTACTGCCGCTGCCTCGAGTGTTCATGACCAATGCAATATTGCAATATTGCAATGCAATGCAAGAGTGAGAGTGAGAGTGAGCTAGGCTTTAGCTAAGCTAAGGTATATGAATGAGCTCGAGCTAAGCTTAGCTTGTGTGTAGTGCTCAAATGGGAGGGATTCAAGGGTGGTATTTAAATGGGTCTTGGAGAGAGAGGTCACTGTGGATGAGATGGCAGAGAGGGGTGGCATGCATGCACTGCACTTGTGTTAGCTAGACCTATAGCTGCATCATATCAAGGTTAGTTTGTAAGTATTCATCTTGTTTTCCAATGTGAGGTTTGGATTTGTGTGCCCTAATTTAACCTTAGGACCAGTAGAGGGGAATGTTGTGTGCTACTAATGTTTGTGTGTGAGTGTGTTGCTTCAAAATTAAGAATGGTTGGAA

>Chung-Chieh

TTCTTGTCATCTAATTGCAGGTTAGTTGTAAAATGTAAAATCGAATTGGACATTTTGAACCAGGTCATGGATTAATTGATTAAGATGCTAGAAGAAATTAACAAGCTGTGCCATGCAATATATCATGCATGCATGCATGAATATGATGGCTAAGTAGGTACTAATGCTAATATAGAAGAGAGAGAGAGAGAGAGAGAGAGAGAGAGAGAGAGAGAGAGATCATCTGCCTAAGTACATATTTGAAGAAGCTCTACTTAATTAACTAGAAATGGCGCCAAGCCACTCTTCTTGTTCGATCTACTGCTAGCTGCTGCTGCTGCTGCTATACTACTCGATCTCTTGCTCGATCGATCAAACGCAGATTGATCAAGATCAACTCGATCTGATCATGGTAGACAGGAAATGATATATGCATGATCGCTCAGAGGCAAAGTGCGTGATTAGCCATGCAATGCCCGGTGCAACTCGATCAATGGGAGAGGAAGCTGAATGGAGAGTAGGAGTCGGAGCCCTGCGACGAGGCGACCATGTCGGCGGCGCCGCCGCTCGCCGGGAACCCGCAGGCGCCGAGCTGGTCCGCCGCGTCGCCGCCGCCCCAGAAGCCGGCGACCATCTGCGCGAGGTCGTCGACGTCCTCCCGGAGCCCCATCATGCCGTAGGCGTCGGCGTCGGAGTAGCGCCGCATGTCCTGATGATCGGCCGCGGCGCCGCCGCCCCTCGGCCGGAGGCAGCTCTCCGGCACCACGCTGCTCAGGTACCCGGAGTTGTCGTCGGCGCCGGAGAAGAGGAAGTCGTGGCCGTTCCTGTCCATGTCCAGCAGCGACGACGACATGCTGGAGCGGTGGGGATCAACCGGGACCATCACCGGCATCGTCGAGCACTCGCCCACCGACGACGCGCCCGACGCCGCGCCATGTCCGTGGTGGTGGTGGTGGTGGTGGTGGTGACCGTACGAGCCAATGTGCGGCGCCGCGCCCACGCCGCCGCCGTACTGCACCGAGGACGGCGCGGCGGCGGCAGCGGCGTACTGCGGCGCGTGGAACGGCGCGAGGAACGGCGGGTAGTTGTAGGCGGCGTGGGTGTAGACGAAGTTGGTGCGCGCCTGGGCGCCCTTCATGGACAGCGCGGCGCGGTCGTACGCCAGCGCCGCCTCCTGCGCCGTGTCGAACGTGCCCAGCCAGTGCCGCTCCTTGGTGGTCGGGTCGCGTATCTCGGCAGCGTACCTCCCCCACGGCCGCCGCCGCACGCCGAGGAACCTCCCTGGCTCCTGCGCGCGCCGCCTGCTGCGCCCCGACGGCGGCCGCTCGCTCATCGGCGACGACGGCGGCGACGGCTGGCTCGCCGGCTTCGGCGGCTCCGAGAACGCCATCAGGCTGGCCTGGCTGCTGCTGCTGCTGCTGCTACTGCCGCTGCCTCGAGTGTTCATGACCAATGCAATATTGCAATATTGCAATGCAATGCAAGAGTGAGAGTGAGAGTGAGCTAGGCTTTAGCTAAGCTAAGGTATATGAATGAGCTCGAGCTAAGCTTAGCTTGTGTGTAGTGCTCAAATGGGAGGGATTCAAGGGTGGTATTTAAATGGGTCTTGGAGAGAGAGGTCACTGTGGATGAGATGGCAGAGAGGGGTGGCATGCATGCACTGCACTTGTGTTAGCTAGACCTATAGCTGCATCATATCAAGGTTAGTTTGTAAGTATTCATCTTGTTTTCCAATGTGAGGTTTGGATTTGTGTGCCCTAATTTAACCTTAGGACCAGTAGAGGGGAATGTTGTGTGCTACTAATGTTTGTGTGTGAGTGTGTTGCTTCAAAATTAAGAATGGTTGGAA

>Ching Chueh Chin yu

TTCTTGTCATCTAATTGCAGGTTAGTTGTAAAATGTAAAATCGAATTGGACATTTTGAACCAGGTCATGGATTAATTGATTAAGATGCTAGAAGAAATTAACAAGCTGTGCCATGCAATATATCATGCATGCATGCATGAATATGATGGCTAAGTAGGTACTAATGCTAATATAGAAGAGAGAGAGAGAGAGAGAGAGAGAGAGAGAGAGAGAGAGAGATCATCTGCCTAAGTACATATTTGAAGAAGCTCTACTTAATTAACTAGAAATGGCGCCAAGCCACTCTTCTTGTTCGATCTACTGCTAGCTGCTGCTGCTGCTGCTATACTACTCGATCTCTTGCTCGATCGATCAAACGCAGATTGATCAAGATCAACTCGATCTGATCATGGTAGACAGGAAATGATATATGCATGATCGCTCAGAGGCAAAGTGCGTGATTAGCCATGCAATGCCCGGTGCAACTCGATCAATGGGAGAGGAAGCTGAATGGAGAGTAGGAGTCGGAGCCCTGCGACGAGGCGACCATGTCGGCGGCGCCGCCGCTCGCCGGGAACCCGCAGGCGCCGAGCTGGTCCGCCGCGTCGCCGCCGCCCCAGAAGCCGGCGACCATCTGCGCGAGGTCGTCGACGTCCTCCCGGAGCCCCATCATGCCGTAGGCGTCGGCGTCGGAGTAGCGCCGCATGTCCTGATGATCGGCCGCGGCGCCGCCGCCCCTCGGCCGGAGGCAGCTCTCCGGCACCACGCTGCTCAGGTACCCGGAGTTGTCGTCGGCGCCGGAGAAGAGGAAGTCGTGGCCGTTCCTGTCCATGTCCAGCAGCGACGACGACATGCTGGAGCGGTGGGGATCAACCGGGACCATCACCGGCATCGTCGAGCACTCGCCCACCGACGACGCGCCCGACGCCGCGCCATGTCCGTGGTGGTGGTGGTGGTGGTGGTGGTGACCGTACGAGCCAATGTGCGGCGCCGCGCCCACGCCGCCGCCGTACTGCACCGAGGACGGCGCGGCGGCGGCAGCGGCGTACTGCGGCGCGTGGAACGGCGCGAGGAACGGCGGGTAGTTGTAGGCGGCGTGGGTGTAGACGAAGTTGGTGCGCGCCTGGGCGCCCTTCATGGACAGCGCGGCGCGGTCGTACGCCAGCGCCGCCTCCTGCGCCGTGTCGAACGTGCCCAGCCAGTGCCGCTCCTTGGTGGTCGGGTCGCGTATCTCGGCAGCGTACCTCCCCCACGGCCGCCGCCGCACGCCGAGGAACCTCCCTGGCTCCTGCGCGCGCCGCCTGCTGCGCCCCGACGGCGGCCGCTCGCTCATCGGCGACGACGGCGGCGACGGCTGGCTCGCCGGCTTCGGCGGCTCCGAGAACGCCATCAGGCTGGCCTGGCTGCTGCTGCTGCTGCTGCTACTGCCGCTGCCTCGAGTGTTCATGACCAATGCAATATTGCAATATTGCAATGCAATGCAAGAGTGAGAGTGAGAGTGAGCTAGGCTTTAGCTAAGCTAAGGTATATGAATGAGCTCGAGCTAAGCTTAGCTTGTGTGTAGTGCTCAAATGGGAGGGATTCAAGGGTGGTATTTAAATGGGTCTTGGAGAGAGAGGTCACTGTGGATGAGATGGCAGAGAGGGGTGGCATGCATGCACTGCACTTGTGTTAGCTAGACCTATAGCTGCATCATATCAAGGTTAGTTTGTAAGTATTCATCTTGTTTTCCAATGTGAGGTTTGGATTTGTGTGCCCTAATTTAACCTTAGGACCAGTAGAGGGGAATGTTGTGTGCTACTAATGTTTGTGTGTGAGTGTGTTGCTTCAAAATTAAGAATGGTTGGAA

>FKR 19

TTCTTGTCATCTAATTGCAGGTTAGTTGTAAAATGTAAAATCGAATTGGACATTTTGAACCAGGTCATGGATTAATTGATTAAGATGCTAGAAGAAATTAACAAGCTGTGCCATGCAATATATCATGCATGCATGCATGAATATGATGGCTAAGTAGGTACTAATGCTAATATAGAAGAGAGAGAGAGAGAGAGAGAGAGAGAGAGAGAGAGAGAGATCATCTGCCTAAGTACATATTTGAAGAAGCTCTACTTAATTAACTAGAAATGGCGCCAAGCCACTCTTCTTGTTCGATCTACTGCTAGCTGCTGCTGCTGCTGCTGCTATACTACTCGATCTCTTGCTCGATCGATCAAACGCAGATTGATCAAGATCAACTCGATCTGATCATGGTAGACAGGAAATGATATATGCATGATCGCTCAGAGGCAAAGTGCGTGATTAGCCATGCAATGCCCGGTGCAACTCGATCAATGGGAGAGGAAGCTGAATGGAGAGTAGGAGTCGGAGCCCTGCGACGAGGCGACCATGTCGGCGGCGCCGCCGCTCGCCGGGAACCCGCAGGCGCCGAGCTGGTCCGCCGCGTCGCCGCCGCCCCAGAAGCCGGCGACCATCTGCGCGAGGTCGTCGACGTCCTCCCGGAGCCCCATCATGCCGTAGGCGTCGGCGTCGGAGTAGCGCCGCATGTCCTGATGATCGGCCGCGGCGCCGCCGCCCCTCGGCCGGAGGCAGCTCTCCGGCACCACGCTGCTCAGGTACCCGGAGTTGTCGTCGGCGCCGGAGAAGAGGAAGTCGTGGCCGTTCCTGTCCATGTCCAGCAGCGACGACGACATGCTGGAGCGGTGGGGATCAACCGGGACCATCACCGGCATCGTCGAGCACTCGCCCACCGACGACGCGCCCGACGCCGCGCCATGTCCGTGGTGGTGGTGGTGGTGGTGGTGGTGACCGTACGAGCCAATGTGCGGCGCCGCGCCCACGCCGCCGCCGTACTGCACCGAGGACGGCGCGGCGGCGGCAGCGGCGTACTGCGGCGCGTGGAACGGCGCGAGGAACGGCGGGTAGTTGTAGGCGGCGTGGGTGTAGACGAAGTTGGTGCGCGCCTGGGCGCCCTTCATGGACAGCGCGGCGCGGTCGTACGCCAGCGCCGCCTCCTGCGCCGTGTCGAACGTGCCCAGCCAGTGCCGCTCCTTGGTGGTCGGGTCGCGTATCTCGGCAGCGTACCTCCCCCACGGCCGCCGCCGCACGCCGAGGAACCTCCCTGGCTCCTGCGCGCGCCGCCTGCTGCGCCCCGACGGCGGCCGCTCGCTCATCGGCGACGACGGCGGCGACGGCTGGCTCGCCGGCTTCGGCGGCTCCGAGAACGCCATCAGGCTGGCCTGGCTGCTGCTGCTGCTGCTGCTACTGCCGCTGCCTCGAGTGTTCATGACCAATGCAATATTGCAATATTGCAATGCAATGCAAGAGTGAGAGTGAGAGTGAGCTAGGCTTTAGCTAAGCTAAGGTATATGAATGAGCTCGAGCTAAGCTTAGCTTGTGTGTAGTGCTCAAATGGGAGGGATTCAAGGGTGGTATTTAAATGGGTCTTGGAGAGAGAGGTCACTGTGGATGAGATGGCAGAGAGGGGTGGCATGCATGCACTGCACTTGTGTTAGCTAGACCTATAGCTGCATCATATCAAGGTTAGTTTGTAAGTATTCATCTTGTTTTCCAATGTGAGGTTTGGATTTGTGTGCCCTAATTTAACCTTAGGACCAGTAGAGGGGAATGTTGTGTGCTACTAATGTTTGTGTGTGAGTGTGTTGCTTCAAAATTAAGAATGGTTGGAA

>ATM3

TTCTTGTCATCTAATTGCAGGTTAGTTGTAAAATGTAAAATCGAATTGGACATTTTGAACCAGGTCATGGATTAATTGATTAAGATGCTAGAAGAAATTAACAAGCTGTGCCATGCAATATATCATGCATGCATGCATGAATATGATGGCTAAGTAGGTACTAATGCTAATATAGAAGAGAGAGAGAGAGAGAGAGAGAGAGAGAGAGAGAGAGAGATCATCTGCCTAAGTACATATTTGAAGAAGCTCTACTTAATTAACTAGAAATGGCGCCAAGCCACTCTTCTTGTTCGATCTACTGCTAGCTGCTGCTGCTGCTGCTGCTATACTACTCGATCTCTTGCTCGATCGATCAAACGCAGATTGATCAAGATCAACTCGATCTGATCATGGTAGACAGGAAATGATATATGCATGATCGCTCAGAGGCAAAGTGCGTGATTAGCCATGCAATGCCCGGTGCAACTCGATCAATGGGAGAGGAAGCTGAATGGAGAGTAGGAGTCGGAGCCCTGCGACGAGGCGACCATGTCGGCGGCGCCGCCGCTCGCCGGGAACCCGCAGGCGCCGAGCTGGTCCGCCGCGTCGCCGCCGCCCCAGAAGCCGGCGACCATCTGCGCGAGGTCGTCGACGTCCTCCCGGAGCCCCATCATGCCGTAGGCGTCGGCGTCGGAGTAGCGCCGCATGTCCTGATGATCGGCCGCGGCGCCGCCGCCCCTCGGCCGGAGGCAGCTCTCCGGCACCACGCTGCTCAGGTACCCGGAGTTGTCGTCGGCGCCGGAGAAGAGGAAGTCGTGGCCGTTCCTGTCCATGTCCAGCAGCGACGACGACATGCTGGAGCGGTGGGGATCAACCGGGACCATCACCGGCATCGTCGAGCACTCGCCCACCGACGACGCGCCCGACGCCGCGCCATGTCCGTGGTGGTGGTGGTGGTGGTGGTGGTGACCGTACGAGCCAATGTGCGGCGCCGCGCCCACGCCGCCGCCGTACTGCACCGAGGACGGCGCGGCGGCGGCAGCGGCGTACTGCGGCGCGTGGAACGGCGCGAGGAACGGCGGGTAGTTGTAGGCGGCGTGGGTGTAGACGAAGTTGGTGCGCGCCTGGGCGCCCTTCATGGACAGCGCGGCGCGGTCGTACGCCAGCGCCGCCTCCTGCGCCGTGTCGAACGTGCCCAGCCAGTGCCGCTCCTTGGTGGTCGGGTCGCGTATCTCGGCAGCGTACCTCCCCCACGGCCGCCGCCGCACGCCGAGGAACCTCCCTGGCTCCTGCGCGCGCCGCCTGCTGCGCCCCGACGGCGGCCGCTCGCTCATCGGCGACGACGGCGGCGACGGCTGGCTCGCCGGCTTCGGCGGCTCCGAGAACGCCATCAGGCTGGCCTGGCTGCTGCTGCTGCTGCTGCTACTGCCGCTGCCTCGAGTGTTCATGACCAATGCAATATTGCAATATTGCAATGCAATGCAAGAGTGAGAGTGAGAGTGAGCTAGGCTTTAGCTAAGCTAAGGTATATGAATGAGCTCGAGCTAAGCTTAGCTTGTGTGTAGTGCTCAAATGGGAGGGATTCAAGGGTGGTATTTAAATGGGTCTTGGAGAGAGAGGTCACTGTGGATGAGATGGCAGAGAGGGGTGGCATGCATGCACTGCACTTGTGTTAGCTAGACCTATAGCTGCATCATATCAAGGTTAGTTTGTAAGTATTCATCTTGTTTTCCAATGTGAGGTTTGGATTTGTGTGCCCTAATTTAACCTTAGGACCAGTAGAGGGGAATGTTGTGTGCTACTAATGTTTGTGTGTGAGTGTGTTGCTTCAAAATTAAGAATGGTTGGAA

>RASI

TTCTTGTCATCTAATTGCAGGTTAGTTGTAAAATGTAAAATCGAATTGGACATTTTGAACCAGGTCATGGATTAATTGATTAAGATGCTAGAAGAAATTAACAAGCTGTGCCATGCAATATATCATGCATGCATGCATGAATATGATGGCTAAGTAGGTACTAATGCTAATATAGAAGAGAGAGAGAGAGAGAGAGAGAGAGAGAGAGAGAGAGAGAGATCATCTGCCTAAGTACATATTTGAAGAAGCTCTACTTAATTAACTAGAAATGGCGCCAAGCCACTCTTCTTGTTCGATCTACTGCTAGCTGCTGCTGCTGCTGCTATACTACTCGATCTCTTGCTCGATCGATCAAACGCAGATTGATCAAGATCAACTCGATCTGATCATGGTAGACAGGAAATGATATATGCATGATCGCTCAGAGGCAAAGTGCGTGATTAGCCATGCAATGCCCGGTGCAACTCGATCAATGGGAGAGGAAGCTGAATGGAGAGTAGGAGTCGGAGCCCTGCGACGAGGCGACCATGTCGGCGGCGCCGCCGCTCGCCGGGAACCCGCAGGCGCCGAGCTGGTCCGCCGCGTCGCCGCCGCCCCAGAAGCCGGCGACCATCTGCGCGAGGTCGTCGACGTCCTCCCGGAGCCCCATCATGCCGTAGGCGTCGGCGTCGGAGTAGCGCCGCATGTCCTGATGATCGGCCGCGGCGCCGCCGCCCCTCGGCCGGAGGCAGCTCTCCGGCACCACGCTGCTCAGGTACCCGGAGTTGTCGTCGGCGCCGGAGAAGAGGAAGTCGTGGCCGTTCCTGTCCATGTCCAGCAGCGACGACGACATGCTGGAGCGGTGGGGATCAACCGGGACCATCACCGGCATCGTCGAGCACTCGCCCACCGACGACGCGCCCGACGCCGCGCCATGTCCGTGGTGGTGGTGGTGGTGGTGGTGGTGACCGTACGAGCCAATGTGCGGCGCCGCGCCCACGCCGCCGCCGTACTGCACCGAGGACGGCGCGGCGGCGGCAGCGGCGTACTGCGGCGCGTGGAACGGCGCGAGGAACGGCGGGTAGTTGTAGGCGGCGTGGGTGTAGACGAAGTTGGTGCGCGCCTGGGCGCCCTTCATGGACAGCGCGGCGCGGTCGTACGCCAGCGCCGCCTCCTGCGCCGTGTCGAACGTGCCCAGCCAGTGCCGCTCCTTGGTGGTCGGGTCGCGTATCTCGGCAGCGTACCTCCCCCACGGCCGCCGCCGCACGCCGAGGAACCTCCCTGGCTCCTGCGCGCGCCGCCTGCTGCGCCCCGACGGCGGCCGCTCGCTCATCGGCGACGACGGCGGCGACGGCTGGCTCGCCGGCTTCGGCGGCTCCGAGAACGCCATCAGGCTGGCCTGGCTGCTGCTGCTGCTGCTGCTACTGCCGCTGCCTCGAGTGTTCATGACCAATGCAATATTGCAATATTGCAATGCAATGCAAGAGTGAGAGTGAGAGTGAGCTAGGCTTTAGCTAAGCTAAGGTATATGAATGAGCTCGAGCTAAGCTTAGCTTGTGTGTAGTGCTCAAATGGGAGGGATTCAAGGGTGGTATTTAAATGGGTCTTGGAGAGAGAGGTCACTGTGGATGAGATGGCAGAGAGGGGTGGCATGCATGCACTGCACTTGTGTTAGCTAGACCTATAGCTGCATCATATCAAGGTTAGTTTGTAAGTATTCATCTTGTTTTCCAATGTGAGGTTTGGATTTGTGTGCCCTAATTTAACCTTAGGACCAGTAGAGGGGAATGTTGTGTGCTACTAATGTTTGTGTGTGAGTGTGTTGCTTCAAAATTAAGAATGGTTGGAA

>Yamagata Sake 49

TTCTTGTCATCTAATTGCAGGTTAGTTGTAAAATGTAAAATCGAATTGGACATTTTGAACCAGGTCATGGATTAATTGATTAAGATGCTAGAAGAAATTAACAAGCTGTGCCATGCAATATATCATGCATGCATGCATGAATATGATGGCTAAGTAGGTACTAATGCTAATATAGAAGAGAGAGAGAGAGAGAGAGAGAGAGAGAGAGAGAGAGAGAGATCATCTGCCTAAGTACATATTTGAAGAAGCTCTACTTAATTAACTAGAAATGGCGCCAAGCCACTCTTCTTGTTCGATCTACTGCTAGCTGCTGCTGCTGCTGCTGCTATACTACTCGATCTCTTGCTCGATCGATCAAACGCAGATTGATCAAGATCAACTCGATCTGATCATGGTAGACAGGAAATGATATATGCATGATCGCTCAGAGGCAAAGTGCGTGATTAGCCATGCAATGCCCGGTGCAACTCGATCAATGGGAGAGGAAGCTGAATGGAGAGTAGGAGTCGGAGCCCTGCGACGAGGCGACCATGTCGGCGGCGCCGCCGCTCGCCGGGAACCCGCAGGCGCCGAGCTGGTCCGCCGCGTCGCCGCCGCCCCAGAAGCCGGCGACCATCTGCGCGAGGTCGTCGACGTCCTCCCGGAGCCCCATCATGCCGTAGGCGTCGGCGTCGGAGTAGCGCCGCATGTCCTGATGATCGGCCGCGGCGCCGCCGCCCCTCGGCCGGAGGCAGCTCTCCGGCACCACGCTGCTCAGGTACCCGGAGTTGTCGTCGGCGCCGGAGAAGAGGAAGTCGTGGCCGTTCCTGTCCATGTCCAGCAGCGACGACGACATGCTGGAGCGGTGGGGATCAACCGGGACCATCACCGGCATCGTCGAGCACTCGCCCACCGACGACGCGCCCGACGCCGCGCCATGTCCGTGGTGGTGGTGGTGGTGGTGGTGGTGACCGTACGAGCCAATGTGCGGCGCCGCGCCCACGCCGCCGCCGTACTGCACCGAGGACGGCGCGGCGGCGGCAGCGGCGTACTGCGGCGCGTGGAACGGCGCGAGGAACGGCGGGTAGTTGTAGGCGGCGTGGGTGTAGACGAAGTTGGTGCGCGCCTGGGCGCCCTTCATGGACAGCGCGGCGCGGTCGTACGCCAGCGCCGCCTCCTGCGCCGTGTCGAACGTGCCCAGCCAGTGCCGCTCCTTGGTGGTCGGGTCGCGTATCTCGGCAGCGTACCTCCCCCACGGCCGCCGCCGCACGCCGAGGAACCTCCCTGGCTCCTGCGCGCGCCGCCTGCTGCGCCCCGACGGCGGCCGCTCGCTCATCGGCGACGACGGCGGCGACGGCTGGCTCGCCGGCTTCGGCGGCTCCGAGAACGCCATCAGGCTGGCCTGGCTGCTGCTGCTGCTGCTGCTACTGCCGCTGCCTCGAGTGTTCATGACCAATGCAATATTGCAATATTGCAATGCAATGCAAGAGTGAGAGTGAGAGTGAGCTAGGCTTTAGCTAAGCTAAGGTATATGAATGAGCTCGAGCTAAGCTTAGCTTGTGTGTAGTGCTCAAATGGGAGGGATTCAAGGGTGGTATTTAAATGGGTCTTGGAGAGAGAGGTCACTGTGGATGAGATGGCAGAGAGGGGTGGCATGCATGCACTGCACTTGTGTTAGCTAGACCTATAGCTGCATCATATCAAGGTTAGTTTGTAAGTATTCATCTTGTTTTCCAATGTGAGGTTTGGATTTGTGTGCCCTAATTTAACCTTAGGACCAGTAGAGGGGAATGTTGTGTGCTACTAATGTTTGTGTGTGAGTGTGTTGCTTCAAAATTAAGAATGGTTGGAA

>Vandana

TTCTTGTCATCTAATTGCAGGTTAGTTGTAAAATGTAAAATCGAATTGGACATTTTGAACCAGGTCATGGATTAATTGATTAAGATGCTAGAAGAAATTAACAAGCTGTGCCATGCAATATATCATGCATGCATGCATGAATATGATGGCTAAGTAGGTACTAATGCTAATATAGAAGAGAGAGAGAGAGAGAGAGAGAGAGAGAGAGAGAGAGAGATCATCTGCCTAAGTACATATTTGAAGAAGCTCTACTTAATTAACTAGAAATGGCGCCAAGCCACTCTTCTTGTTCGATCTACTGCTAGCTGCTGCTGCTGCTGCTGCTATACTACTCGATCTCTTGCTCGATCGATCAAACGCAGATTGATCAAGATCAACTCGATCTGATCATGGTAGACAGGAAATGATATATGCATGATCGCTCAGAGGCAAAGTGCGTGATTAGCCATGCAATGCCCGGTGCAACTCGATCAATGGGAGAGGAAGCTGAATGGAGAGTAGGAGTCGGAGCCCTGCGACGAGGCGACCATGTCGGCGGCGCCGCCGCTCGCCGGGAACCCGCAGGCGCCGAGCTGGTCCGCCGCGTCGCCGCCGCCCCAGAAGCCGGCGACCATCTGCGCGAGGTCGTCGACGTCCTCCCGGAGCCCCATCATGCCGTAGGCGTCGGCGTCGGAGTAGCGCCGCATGTCCTGATGATCGGCCGCGGCGCCGCCGCCCCTCGGCCGGAGGCAGCTCTCCGGCACCACGCTGCTCAGGTACCCGGAGTTGTCGTCGGCGCCGGAGAAGAGGAAGTCGTGGCCGTTCCTGTCCATGTCCAGCAGCGACGACGACATGCTGGAGCGGTGGGGATCAACCGGGACCATCACCGGCATCGTCGAGCACTCGCCCACCGACGACGCGCCCGACGCCGCGCCATGTCCGTGGTGGTGGTGGTGGTGGTGGTGGTGACCGTACGAGCCAATGTGCGGCGCCGCGCCCACGCCGCCGCCGTACTGCACCGAGGACGGCGCGGCGGCGGCAGCGGCGTACTGCGGCGCGTGGAACGGCGCGAGGAACGGCGGGTAGTTGTAGGCGGCGTGGGTGTAGACGAAGTTGGTGCGCGCCTGGGCGCCCTTCATGGACAGCGCGGCGCGGTCGTACGCCAGCGCCGCCTCCTGCGCCGTGTCGAACGTGCCCAGCCAGTGCCGCTCCTTGGTGGTCGGGTCGCGTATCTCGGCAGCGTACCTCCCCCACGGCCGCCGCCGCACGCCGAGGAACCTCCCTGGCTCCTGCGCGCGCCGCCTGCTGCGCCCCGACGGCGGCCGCTCGCTCATCGGCGACGACGGCGGCGACGGCTGGCTCGCCGGCTTCGGCGGCTCCGAGAACGCCATCAGGCTGGCCTGGCTGCTGCTGCTGCTGCTGCTACTGCCGCTGCCTCGAGTGTTCATGACCAATGCAATATTGCAATATTGCAATGCAATGCAAGAGTGAGAGTGAGAGTGAGCTAGGCTTTAGCTAAGCTAAGGTATATGAATGAGCTCGAGCTAAGCTTAGCTTGTGTGTAGTGCTCAAATGGGAGGGATTCAAGGGTGGTATTTAAATGGGTCTTGGAGAGAGAGGTCACTGTGGATGAGATGGCAGAGAGGGGTGGCATGCATGCACTGCACTTGTGTTAGCTAGACCTATAGCTGCATCATATCAAGGTTAGTTTGTAAGTATTCATCTTGTTTTCCAATGTGAGGTTTGGATTTGTGTGCCCTAATTTAACCTTAGGACCAGTAGAGGGGAATGTTGTGTGCTACTAATGTTTGTGTGTGAGTGTGTTGCTTCAAAATTAAGAATGGTTGGAA

>Milky

TTCTTGTCATCTAATTGCAGGTTAGTTGTAAAATGTAAAATCGAATTGGACATTTTGAACCAGGTCATGGATTAATTGATTAAGATGCTAGAAGAAATTAACAAGCTGTGCCATGCAATATATCATGCATGCATGCATGAATATGATGGCTAAGTAGGTACTAATGCTAATATAGAAGAGAGAGAGAGAGAGAGAGAGAGAGAGAGAGAGAGAGAGAGATCATCTGCCTAAGTACATATTTGAAGAAGCTCTACTTAATTAACTAGAAATGGCGCCAAGCCACTCTTCTTGTTCGATCTACTGCTAGCTGCTGCTGCTGCTGCTGCTATACTACTCGATCTCTTGCTCGATCGATCAAACGCAGATTGATCAAGATCAACTCGATCTGATCATGGTAGACAGGAAATGATATATGCATGATCGCTCAGAGGCAAAGTGCGTGATTAGCCATGCAATGCCCGGTGCAACTCGATCAATGGGAGAGGAAGCTGAATGGAGAGTAGGAGTCGGAGCCCTGCGACGAGGCGACCATGTCGGCGGCGCCGCCGCTCGCCGGGAACCCGCAGGCGCCGAGCTGGTCCGCCGCGTCGCCGCCGCCCCAGAAGCCGGCGACCATCTGCGCGAGGTCGTCGACGTCCTCCCGGAGCCCCATCATGCCGTAGGCGTCGGCGTCGGAGTAGCGCCGCATGTCCTGATGATCGGCCGCGGCGCCGCCGCCCCTCGGCCGGAGGCAGCTCTCCGGCACCACGCTGCTCAGGTACCCGGAGTTGTCGTCGGCGCCGGAGAAGAGGAAGTCGTGGCCGTTCCTGTCCATGTCCAGCAGCGACGACGACATGCTGGAGCGGTGGGGATCAACCGGGACCATCACCGGCATCGTCGAGCACTCGCCCACCGACGACGCGCCCGACGCCGCGCCATGTCCGTGGTGGTGGTGGTGGTGGTGGTGGTGACCGTACGAGCCAATGTGCGGCGCCGCGCCCACGCCGCCGCCGTACTGCACCGAGGACGGCGCGGCGGCGGCAGCGGCGTACTGCGGCGCGTGGAACGGCGCGAGGAACGGCGGGTAGTTGTAGGCGGCGTGGGTGTAGACGAAGTTGGTGCGCGCCTGGGCGCCCTTCATGGACAGCGCGGCGCGGTCGTACGCCAGCGCCGCCTCCTGCGCCGTGTCGAACGTGCCCAGCCAGTGCCGCTCCTTGGTGGTCGGGTCGCGTATCTCGGCAGCGTACCTCCCCCACGGCCGCCGCCGCACGCCGAGGAACCTCCCTGGCTCCTGCGCGCGCCGCCTGCTGCGCCCCGACGGCGGCCGCTCGCTCATCGGCGACGACGGCGGCGACGGCTGGCTCGCCGGCTTCGGCGGCTCCGAGAACGCCATCAGGCTGGCCTGGCTGCTGCTGCTGCTGCTGCTACTGCCGCTGCCTCGAGTGTTCATGACCAATGCAATATTGCAATATTGCAATGCAATGCAAGAGTGAGAGTGAGAGTGAGCTAGGCTTTAGCTAAGCTAAGGTATATGAATGAGCTCGAGCTAAGCTTAGCTTGTGTGTAGTGCTCAAATGGGAGGGATTCAAGGGTGGTATTTAAATGGGTCTTGGAGAGAGAGGTCACTGTGGATGAGATGGCAGAGAGGGGTGGCATGCATGCACTGCACTTGTGTTAGCTAGACCTATAGCTGCATCATATCAAGGTTAGTTTGTAAGTATTCATCTTGTTTTCCAATGTGAGGTTTGGATTTGTGTGCCCTAATTTAACCTTAGGACCAGTAGAGGGGAATGTTGTGTGCTACTAATGTTTGTGTGTGAGTGTGTTGCTTCAAAATTAAGAATGGTTGGAA

>Mudgo

TTCTTGTCATCTAATTGCAGGTTAGTTGTAAAATGTAAAATCGAATTGGACATTTTGAACCAGGTCATGGATTAATTGATTAAGATGCTAGAAGAAATTAACAAGCTGTGCCATGCAATATATCATGCATGCATGCATGAATATGATGGCTAAGTAGGTACTAATGCTAATATAGAAGAGAGAGAGAGAGAGAGAGATCATCTGCCTAAGTACATATTTGAAGAAGCTCTACTTAATTAACTAGAAATGGCGCCAAGCCACTCTTCTTGTTCGATCTACTGCTAGCTGCTGCTGCTGCTGATGCTATACTACTCGATCTCTTGCTCGATCGATCAAACGCAGATTGATCAAGATCAACTCGATCTGATCATGGTAGACAGGAAATGATATATGCATGATCGCTCAGAGGCAAAGTGCGTGATTAGCCATGCAATGCCCGGTGCAACTCGATCAATGGGAGAGGAAGCTGAATGGAGAGTAGGAGTCGGAGCCCTGCGACGAGGCGACCATGTCGGCGGCGCCGCCGCTCGCCGGGAACCCGCAGGCGCCGAGCTGGTCCGCCGCGTCGCCGCCGCCCCAGAAGCCGGCGACCATCTGCGCGAGGTCGTCGACGTCCTCCCGGAGCCCCATCATGCCGTAGGCGTCGGCGTCGGAGTAGCGCCGCATGTCCTGATGATCGGCCG**T**GGCGCCGCCGCCCCTCGGCCGGAGGCAGCTCTCCGGCACCACGCTGCTCAGGTACCCGGAGTTGTCGTCGGCGCCGGAGAAGAGGAAGTCGTGGCCGTTCCTGTCCATGTCCAGCAGCGACGACGACATGCTGGAGCGGTGGGGATCAACCGGGACCATCACCGGCATCGTCGAGCACTCGCCCACCGACGACGCGCCCGACGCCGCGCCATGTCCGTGGTGGTGGTGGTGGTGGTGGTGGTGACCGTACGAGCCAATGTGCGGCGCCGCGCCCACGCCGCCGCCGTACTGCACCGAGGACGGCGCGGCGGCGGCGGCGGCGTACTGCGGCGCGTGGAACGGCGCGAGGAACGGCGGGTAGTTGTAGGCGGCGTGGGTGTAGACGAAGTTGGTGCGCGCCTGGGCGCCCTTCATGGACAGCGCGGCGCGGTCGTACGCCAGCGCCGCCTCCTGCGCCGTGTCGAACGTGCCCAGCCAGTGCCGCTCCTTGGTGGTCGGGTCGCGTATCTCGGCGGCGTACCTCCCCCACGGCCGCCGCCGCACGCCGAGGAACCTCCCGGGCTCCTGCGCGCGCCGCCTGCTGCGCCCCGACGGCGGCCGCTCGCTCATCGGCGACGACGGCGGCGACGGCTGGCTCGCCGGCTTCGGCGGCTCCGAGAACGCCATCAGGCTGGCCTGGCTGCTGCTGCTGCTGCTGCTACTGCCGCTGCCTCGAGTGTTCATGACCAATGCAATATTGCAATATTGCAATGCAATGCAAGAGTGAGAGTGAGAGTGAGCTAGGCTTTAGCTAAGCTAAGGTATATGAATGAGCTCGAGCTAAGCTTAGCTTGTGTGTAGTGCTCAAATGGGAGGGATGCAAGGGTGGTATTTAAATGGGTCTTGGAGAGAGAGGTCACTGTGGATGAGATGGCAGAGAGGGGTGGCATGCATGCACTGCACATGTGTTAGCTAGACCTATAGCTGCATCATATCAAGGTTAGTTTGTAAGTATTCATCTTGTTTTCCAATGTGAGGTTTGGATTTGTGTGCCCTAATTTAACCTTAGGACCAGTAGAGGGGAATGTTGTGTGCTACTAATGTTTGTGTGTGAGTGTGTTGCTTCAAAATTAAGAATGGTTGGAA

>Yamadanishiki

TTCTTGTCATCTAATTGCAGGTTAGTTGTAAAATGTAAAATCGAATTGGACATTTTGAACCAGGTCATGGATTAATTGATTAAGATGCTAGAAGAAATTAACAAGCTGTGCCATGCAATATATCATGCATGCATGCATGAATATGATGGCTAAGTAGGTACTAATGCTAATATAGAAGAGAGAGAGAGAGAGAGAGAGAGAGAGAGAGAGAGAGAGAGATCATCTGCCTAAGTACATATTTGAAGAAGCTCTACTTAATTAACTAGAAATGGCGCCAAGCCACTCTTCTTGTTCGATCTACTGCTAGCTGCTGCTGCTGCTGCTGCTATACTACTCGATCTCTTGCTCGATCGATCAAACGCAGATTGATCAAGATCAACTCGATCTGATCATGGTAGACAGGAAATGATATATGCATGATCGCTCAGAGGCAAAGTGCGTGATTAGCCATGCAATGCCCGGTGCAACTCGATCAATGGGAGAGGAAGCTGAATGGAGAGTAGGAGTCGGAGCCCTGCGACGAGGCGACCATGTCGGCGGCGCCGCCGCTCGCCGGGAACCCGCAGGCGCCGAGCTGGTCCGCCGCGTCGCCGCCGCCCCAGAAGCCGGCGACCATCTGCGCGAGGTCGTCGACGTCCTCCCGGAGCCCCATCATGCCGTAGGCGTCGGCGTCGGAGTAGCGCCGCATGTCCTGATGATCGGCCGCGGCGCCGCCGCCCCTCGGCCGGAGGCAGCTCTCCGGCACCACGCTGCTCAGGTACCCGGAGTTGTCGTCGGCGCCGGAGAAGAGGAAGTCGTGGCCGTTCCTGTCCATGTCCAGCAGCGACGACGACATGCTGGAGCGGTGGGGATCAACCGGGACCATCACCGGCATCGTCGAGCACTCGCCCACCGACGACGCGCCCGACGCCGCGCCATGTCCGTGGTGGTGGTGGTGGTGGTGGTGGTGACCGTACGAGCCAATGTGCGGCGCCGCGCCCACGCCGCCGCCGTACTGCACCGAGGACGGCGCGGCGGCGGCAGCGGCGTACTGCGGCGCGTGGAACGGCGCGAGGAACGGCGGGTAGTTGTAGGCGGCGTGGGTGTAGACGAAGTTGGTGCGCGCCTGGGCGCCCTTCATGGACAGCGCGGCGCGGTCGTACGCCAGCGCCGCCTCCTGCGCCGTGTCGAACGTGCCCAGCCAGTGCCGCTCCTTGGTGGTCGGGTCGCGTATCTCGGCAGCGTACCTCCCCCACGGCCGCCGCCGCACGCCGAGGAACCTCCCTGGCTCCTGCGCGCGCCGCCTGCTGCGCCCCGACGGCGGCCGCTCGCTCATCGGCGACGACGGCGGCGACGGCTGGCTCGCCGGCTTCGGCGGCTCCGAGAACGCCATCAGGCTGGCCTGGCTGCTGCTGCTGCTGCTGCTACTGCCGCTGCCTCGAGTGTTCATGACCAATGCAATATTGCAATATTGCAATGCAATGCAAGAGTGAGAGTGAGAGTGAGCTAGGCTTTAGCTAAGCTAAGGTATATGAATGAGCTCGAGCTAAGCTTAGCTTGTGTGTAGTGCTCAAATGGGAGGGATTCAAGGGTGGTATTTAAATGGGTCTTGGAGAGAGAGGTCACTGTGGATGAGATGGCAGAGAGGGGTGGCATGCATGCACTGCACTTGTGTTAGCTAGACCTATAGCTGCATCATATCAAGGTTAGTTTGTAAGTATTCATCTTGTTTTCCAATGTGAGGTTTGGATTTGTGTGCCCTAATTTAACCTTAGGACCAGTAGAGGGGAATGTTGTGTGCTACTAATGTTTGTGTGTGAGTGTGTTGCTTCAAAATTAAGAATGGTTGGAA

>Lomello-2

TTCTTGTCATCTAATTGCAGGTTAGTTGTAAAATGTAAAATCGAATTGGACATTTTGAACCAGGTCATGGATTAATTGATTAAGATGCTAGAAGAAATTAACAAGCTGTGCCATGCAATATATCATGCATGCATGCATGAATATGATGGCTAAGTAGGTACTAATGCTAATATAGAAGAGAGAGAGAGAGAGAGAGAGAGAGAGAGAGAGAGAGAGAGATCATCTGCCTAAGTACATATTTGAAGAAGCTCTACTTAATTAACTAGAAATGGCGCCAAGCCACTCTTCTTGTTCGATCTACTGCTAGCTGCTGCTGCTGCTGCTGCTATACTACTCGATCTCTTGCTCGATCGATCAAACGCAGATTGATCAAGATCAACTCGATCTGATCATGGTAGACAGGAAATGATATATGCATGATCGCTCAGAGGCAAAGTGCGTGATTAGCCATGCAATGCCCGGTGCAACTCGATCAATGGGAGAGGAAGCTGAATGGAGAGTAGGAGTCGGAGCCCTGCGACGAGGCGACCATGTCGGCGGCGCCGCCGCTCGCCGGGAACCCGCAGGCGCCGAGCTGGTCCGCCGCGTCGCCGCCGCCCCAGAAGCCGGCGACCATCTGCGCGAGGTCGTCGACGTCCTCCCGGAGCCCCATCATGCCGTAGGCGTCGGCGTCGGAGTAGCGCCGCATGTCCTGATGATCGGCCGCGGCGCCGCCGCCCCTCGGCCGGAGGCAGCTCTCCGGCACCACGCTGCTCAGGTACCCGGAGTTGTCGTCGGCGCCGGAGAAGAGGAAGTCGTGGCCGTTCCTGTCCATGTCCAGCAGCGACGACGACATGCTGGAGCGGTGGGGATCAACCGGGACCATCACCGGCATCGTCGAGCACTCGCCCACCGACGACGCGCCCGACGCCGCGCCATGTCCGTGGTGGTGGTGGTGGTGGTGGTGGTGACCGTACGAGCCAATGTGCGGCGCCGCGCCCACGCCGCCGCCGTACTGCACCGAGGACGGCGCGGCGGCGGCAGCGGCGTACTGCGGCGCGTGGAACGGCGCGAGGAACGGCGGGTAGTTGTAGGCGGCGTGGGTGTAGACGAAGTTGGTGCGCGCCTGGGCGCCCTTCATGGACAGCGCGGCGCGGTCGTACGCCAGCGCCGCCTCCTGCGCCGTGTCGAACGTGCCCAGCCAGTGCCGCTCCTTGGTGGTCGGGTCGCGTATCTCGGCAGCGTACCTCCCCCACGGCCGCCGCCGCACGCCGAGGAACCTCCCTGGCTCCTGCGCGCGCCGCCTGCTGCGCCCCGACGGCGGCCGCTCGCTCATCGGCGACGACGGCGGCGACGGCTGGCTCGCCGGCTTCGGCGGCTCCGAGAACGCCATCAGGCTGGCCTGGCTGCTGCTGCTGCTGCTGCTACTGCCGCTGCCTCGAGTGTTCATGACCAATGCAATATTGCAATATTGCAATGCAATGCAAGAGTGAGAGTGAGAGTGAGCTAGGCTTTAGCTAAGCTAAGGTATATGAATGAGCTCGAGCTAAGCTTAGCTTGTGTGTAGTGCTCAAATGGGAGGGATTCAAGGGTGGTATTTAAATGGGTCTTGGAGAGAGAGGTCACTGTGGATGAGATGGCAGAGAGGGGTGGCATGCATGCACTGCACTTGTGTTAGCTAGACCTATAGCTGCATCATATCAAGGTTAGTTTGTAAGTATTCATCTTGTTTTCCAATGTGAGGTTTGGATTTGTGTGCCCTAATTTAACCTTAGGACCAGTAGAGGGGAATGTTGTGTGCTACTAATGTTTGTGTGTGAGTGTGTTGCTTCAAAATTAAGAATGGTTGGAA

>PsBRc 4

TTCTTGTCATCTAATTGCAGGTTAGTTGTAAAATGTAAAATCGAATTGGACATTTTGAACCAGGTCATGGATTAATTGATTAAGATGCTAGAAGAAATTAACAAGCTGTGCCATGCAATATATCATGCATGCATGCATGAATATGATGGCTAAGTAGGTACTAATGCTAATATAGAAGAGAGAGAGAGAGAGAGAGAGAGAGAGAGAGAGAGAGAGATCATCTGCCTAAGTACATATTTGAAGAAGCTCTACTTAATTAACTAGAAATGGCGCCAAGCCACTCTTCTTGTTCGATCTACTGCTAGCTGCTGCTGCTGCTGCTGCTATACTACTCGATCTCTTGCTCGATCGATCAAACGCAGATTGATCAAGATCAACTCGATCTGATCATGGTAGACAGGAAATGATATATGCATGATCGCTCAGAGGCAAAGTGCGTGATTAGCCATGCAATGCCCGGTGCAACTCGATCAATGGGAGAGGAAGCTGAATGGAGAGTAGGAGTCGGAGCCCTGCGACGAGGCGACCATGTCGGCGGCGCCGCCGCTCGCCGGGAACCCGCAGGCGCCGAGCTGGTCCGCCGCGTCGCCGCCGCCCCAGAAGCCGGCGACCATCTGCGCGAGGTCGTCGACGTCCTCCCGGAGCCCCATCATGCCGTAGGCGTCGGCGTCGGAGTAGCGCCGCATGTCCTGATGATCGGCCGCGGCGCCGCCGCCCCTCGGCCGGAGGCAGCTCTCCGGCACCACGCTGCTCAGGTACCCGGAGTTGTCGTCGGCGCCGGAGAAGAGGAAGTCGTGGCCGTTCCTGTCCATGTCCAGCAGCGACGACGACATGCTGGAGCGGTGGGGATCAACCGGGACCATCACCGGCATCGTCGAGCACTCGCCCACCGACGACGCGCCCGACGCCGCGCCATGTCCGTGGTGGTGGTGGTGGTGGTGGTGGTGACCGTACGAGCCAATGTGCGGCGCCGCGCCCACGCCGCCGCCGTACTGCACCGAGGACGGCGCGGCGGCGGCAGCGGCGTACTGCGGCGCGTGGAACGGCGCGAGGAACGGCGGGTAGTTGTAGGCGGCGTGGGTGTAGACGAAGTTGGTGCGCGCCTGGGCGCCCTTCATGGACAGCGCGGCGCGGTCGTACGCCAGCGCCGCCTCCTGCGCCGTGTCGAACGTGCCCAGCCAGTGCCGCTCCTTGGTGGTCGGGTCGCGTATCTCGGCAGCGTACCTCCCCCACGGCCGCCGCCGCACGCCGAGGAACCTCCCTGGCTCCTGCGCGCGCCGCCTGCTGCGCCCCGACGGCGGCCGCTCGCTCATCGGCGACGACGGCGGCGACGGCTGGCTCGCCGGCTTCGGCGGCTCCGAGAACGCCATCAGGCTGGCCTGGCTGCTGCTGCTGCTGCTGCTACTGCCGCTGCCTCGAGTGTTCATGACCAATGCAATATTGCAATATTGCAATGCAATGCAAGAGTGAGAGTGAGAGTGAGCTAGGCTTTAGCTAAGCTAAGGTATATGAATGAGCTCGAGCTAAGCTTAGCTTGTGTGTAGTGCTCAAATGGGAGGGATTCAAGGGTGGTATTTAAATGGGTCTTGGAGAGAGAGGTCACTGTGGATGAGATGGCAGAGAGGGGTGGCATGCATGCACTGCACTTGTGTTAGCTAGACCTATAGCTGCATCATATCAAGGTTAGTTTGTAAGTATTCATCTTGTTTTCCAATGTGAGGTTTGGATTTGTGTGCCCTAATTTAACCTTAGGACCAGTAGAGGGGAATGTTGTGTGCTACTAATGTTTGTGTGTGAGTGTGTTGCTTCAAAATTAAGAATGGTTGGAA

>PsBRc 10

TTCTTGTCATCTAATTGCAGGTTAGTTGTAAAATGTAAAATCGAATTGGACATTTTGAACCAGGTCATGGATTAATTGATTAAGATGCTAGAAGAAATTAACAAGCTGTGCCATGCAATATATCATGCATGCATGCATGAATATGATGGCTAAGTAGGTACTAATGCTAATATAGAAGAGAGAGAGAGAGAGAGAGAGAGAGAGAGAGAGAGAGAGATCATCTGCCTAAGTACATATTTGAAGAAGCTCTACTTAATTAACTAGAAATGGCGCCAAGCCACTCTTCTTGTTCGATCTACTGCTAGCTGCTGCTGCTGCTGCTGCTATACTACTCGATCTCTTGCTCGATCGATCAAACGCAGATTGATCAAGATCAACTCGATCTGATCATGGTAGACAGGAAATGATATATGCATGATCGCTCAGAGGCAAAGTGCGTGATTAGCCATGCAATGCCCGGTGCAACTCGATCAATGGGAGAGGAAGCTGAATGGAGAGTAGGAGTCGGAGCCCTGCGACGAGGCGACCATGTCGGCGGCGCCGCCGCTCGCCGGGAACCCGCAGGCGCCGAGCTGGTCCGCCGCGTCGCCGCCGCCCCAGAAGCCGGCGACCATCTGCGCGAGGTCGTCGACGTCCTCCCGGAGCCCCATCATGCCGTAGGCGTCGGCGTCGGAGTAGCGCCGCATGTCCTGATGATCGGCCGCGGCGCCGCCGCCCCTCGGCCGGAGGCAGCTCTCCGGCACCACGCTGCTCAGGTACCCGGAGTTGTCGTCGGCGCCGGAGAAGAGGAAGTCGTGGCCGTTCCTGTCCATGTCCAGCAGCGACGACGACATGCTGGAGCGGTGGGGATCAACCGGGACCATCACCGGCATCGTCGAGCACTCGCCCACCGACGACGCGCCCGACGCCGCGCCATGTCCGTGGTGGTGGTGGTGGTGGTGGTGGTGACCGTACGAGCCAATGTGCGGCGCCGCGCCCACGCCGCCGCCGTACTGCACCGAGGACGGCGCGGCGGCGGCAGCGGCGTACTGCGGCGCGTGGAACGGCGCGAGGAACGGCGGGTAGTTGTAGGCGGCGTGGGTGTAGACGAAGTTGGTGCGCGCCTGGGCGCCCTTCATGGACAGCGCGGCGCGGTCGTACGCCAGCGCCGCCTCCTGCGCCGTGTCGAACGTGCCCAGCCAGTGCCGCTCCTTGGTGGTCGGGTCGCGTATCTCGGCAGCGTACCTCCCCCACGGCCGCCGCCGCACGCCGAGGAACCTCCCTGGCTCCTGCGCGCGCCGCCTGCTGCGCCCCGACGGCGGCCGCTCGCTCATCGGCGACGACGGCGGCGACGGCTGGCTCGCCGGCTTCGGCGGCTCCGAGAACGCCATCAGGCTGGCCTGGCTGCTGCTGCTGCTGCTGCTACTGCCGCTGCCTCGAGTGTTCATGACCAATGCAATATTGCAATATTGCAATGCAATGCAAGAGTGAGAGTGAGAGTGAGCTAGGCTTTAGCTAAGCTAAGGTATATGAATGAGCTCGAGCTAAGCTTAGCTTGTGTGTAGTGCTCAAATGGGAGGGATTCAAGGGTGGTATTTAAATGGGTCTTGGAGAGAGAGGTCACTGTGGATGAGATGGCAGAGAGGGGTGGCATGCATGCACTGCACTTGTGTTAGCTAGACCTATAGCTGCATCATATCAAGGTTAGTTTGTAAGTATTCATCTTGTTTTCCAATGTGAGGTTTGGATTTGTGTGCCCTAATTTAACCTTAGGACCAGTAGAGGGGAATGTTGTGTGCTACTAATGTTTGTGTGTGAGTGTGTTGCTTCAAAATTAAGAATGGTTGGAA

>IF 176

TTCTTGTCATCTAATTGCAGGTTAGTTGTAAAATGTAAAATCGAATTGGACATTTTGAACCAGGTCATGGATTAATTGATTAAGATGCTAGAAGAAATTAACAAGCTGTGCCATGCAATATATCATGCATGCATGCATGAATATGATGGCTAAGTAGGTACTAATGCTAATATAGAAGAGAGAGAGAGAGAGAGAGAGAGAGAGAGAGAGAGAGAGAGATCATCTGCCTAAGTACATATTTGAAGAAGCTCTACTTAATTAACTAGAAATGGCGCCAAGCCACTCTTCTTGTTCGATCTACTGCTAGCTGCTGCTGCTGCTGCTGCTATACTACTCGATCTCTTGCTCGATCGATCAAACGCAGATTGATCAAGATCAACTCGATCTGATCATGGTAGACAGGAAATGATATATGCATGATCGCTCAGAGGCAAAGTGCGTGATTAGCCATGCAATGCCCGGTGCAACTCGATCAATGGGAGAGGAAGCTGAATGGAGAGTAGGAGTCGGAGCCCTGCGACGAGGCGACCATGTCGGCGGCGCCGCCGCTCGCCGGGAACCCGCAGGCGCCGAGCTGGTCCGCCGCGTCGCCGCCGCCCCAGAAGCCGGCGACCATCTGCGCGAGGTCGTCGACGTCCTCCCGGAGCCCCATCATGCCGTAGGCGTCGGCGTCGGAGTAGCGCCGCATGTCCTGATGATCGGCCGCGGCGCCGCCGCCCCTCGGCCGGAGGCAGCTCTCCGGCACCACGCTGCTCAGGTACCCGGAGTTGTCGTCGGCGCCGGAGAAGAGGAAGTCGTGGCCGTTCCTGTCCATGTCCAGCAGCGACGACGACATGCTGGAGCGGTGGGGATCAACCGGGACCATCACCGGCATCGTCGAGCACTCGCCCACCGACGACGCGCCCGACGCCGCGCCATGTCCGTGGTGGTGGTGGTGGTGGTGGTGGTGACCGTACGAGCCAATGTGCGGCGCCGCGCCCACGCCGCCGCCGTACTGCACCGAGGACGGCGCGGCGGCGGCAGCGGCGTACTGCGGCGCGTGGAACGGCGCGAGGAACGGCGGGTAGTTGTAGGCGGCGTGGGTGTAGACGAAGTTGGTGCGCGCCTGGGCGCCCTTCATGGACAGCGCGGCGCGGTCGTACGCCAGCGCCGCCTCCTGCGCCGTGTCGAACGTGCCCAGCCAGTGCCGCTCCTTGGTGGTCGGGTCGCGTATCTCGGCAGCGTACCTCCCCCACGGCCGCCGCCGCACGCCGAGGAACCTCCCTGGCTCCTGCGCGCGCCGCCTGCTGCGCCCCGACGGCGGCCGCTCGCTCATCGGCGACGACGGCGGCGACGGCTGGCTCGCCGGCTTCGGCGGCTCCGAGAACGCCATCAGGCTGGCCTGGCTGCTGCTGCTGCTGCTGCTACTGCCGCTGCCTCGAGTGTTCATGACCAATGCAATATTGCAATATTGCAATGCAATGCAAGAGTGAGAGTGAGAGTGAGCTAGGCTTTAGCTAAGCTAAGGTATATGAATGAGCTCGAGCTAAGCTTAGCTTGTGTGTAGTGCTCAAATGGGAGGGATTCAAGGGTGGTATTTAAATGGGTCTTGGAGAGAGAGGTCACTGTGGATGAGATGGCAGAGAGGGGTGGCATGCATGCACTGCACTTGTGTTAGCTAGACCTATAGCTGCATCATATCAAGGTTAGTTTGTAAGTATTCATCTTGTTTTCCAATGTGAGGTTTGGATTTGTGTGCCCTAATTTAACCTTAGGACCAGTAGAGGGGAATGTTGTGTGCTACTAATGTTTGTGTGTGAGTGTGTTGCTTCAAAATTAAGAATGGTTGGAA

>BG367-4-1

TTCTTGTCATCTAATTGCAGGTTAGTTGTAAAATGTAAAATCGAATTGGACATTTTGAACCAGGTCATGGATTAATTGATTAAGATGCTAGAAGAAATTAACAAGCTGTGCCATGCAATATATCATGCATGCATGCATGAATATGATGGCTAAGTAGGTACTAATGCTAATATAGAAGAGAGAGAGAGAGAGAGAGAGAGAGAGAGAGAGAGAGAGATCATCTGCCTAAGTACATATTTGAAGAAGCTCTACTTAATTAACTAGAAATGGCGCCAAGCCACTCTTCTTGTTCGATCTACTGCTAGCTGCTGCTGCTGCTGCTGCTATACTACTCGATCTCTTGCTCGATCGATCAAACGCAGATTGATCAAGATCAACTCGATCTGATCATGGTAGACAGGAAATGATATATGCATGATCGCTCAGAGGCAAAGTGCGTGATTAGCCATGCAATGCCCGGTGCAACTCGATCAATGGGAGAGGAAGCTGAATGGAGAGTAGGAGTCGGAGCCCTGCGACGAGGCGACCATGTCGGCGGCGCCGCCGCTCGCCGGGAACCCGCAGGCGCCGAGCTGGTCCGCCGCGTCGCCGCCGCCCCAGAAGCCGGCGACCATCTGCGCGAGGTCGTCGACGTCCTCCCGGAGCCCCATCATGCCGTAGGCGTCGGCGTCGGAGTAGCGCCGCATGTCCTGATGATCGGCCGCGGCGCCGCCGCCCCTCGGCCGGAGGCAGCTCTCCGGCACCACGCTGCTCAGGTACCCGGAGTTGTCGTCGGCGCCGGAGAAGAGGAAGTCGTGGCCGTTCCTGTCCATGTCCAGCAGCGACGACGACATGCTGGAGCGGTGGGGATCAACCGGGACCATCACCGGCATCGTCGAGCACTCGCCCACCGACGACGCGCCCGACGCCGCGCCATGTCCGTGGTGGTGGTGGTGGTGGTGGTGGTGACCGTACGAGCCAATGTGCGGCGCCGCGCCCACGCCGCCGCCGTACTGCACCGAGGACGGCGCGGCGGCGGCAGCGGCGTACTGCGGCGCGTGGAACGGCGCGAGGAACGGCGGGTAGTTGTAGGCGGCGTGGGTGTAGACGAAGTTGGTGCGCGCCTGGGCGCCCTTCATGGACAGCGCGGCGCGGTCGTACGCCAGCGCCGCCTCCTGCGCCGTGTCGAACGTGCCCAGCCAGTGCCGCTCCTTGGTGGTCGGGTCGCGTATCTCGGCAGCGTACCTCCCCCACGGCCGCCGCCGCACGCCGAGGAACCTCCCTGGCTCCTGCGCGCGCCGCCTGCTGCGCCCCGACGGCGGCCGCTCGCTCATCGGCGACGACGGCGGCGACGGCTGGCTCGCCGGCTTCGGCGGCTCCGAGAACGCCATCAGGCTGGCCTGGCTGCTGCTGCTGCTGCTGCTACTGCCGCTGCCTCGAGTGTTCATGACCAATGCAATATTGCAATATTGCAATGCAATGCAAGAGTGAGAGTGAGAGTGAGCTAGGCTTTAGCTAAGCTAAGGTATATGAATGAGCTCGAGCTAAGCTTAGCTTGTGTGTAGTGCTCAAATGGGAGGGATTCAAGGGTGGTATTTAAATGGGTCTTGGAGAGAGAGGTCACTGTGGATGAGATGGCAGAGAGGGGTGGCATGCATGCACTGCACTTGTGTTAGCTAGACCTATAGCTGCATCATATCAAGGTTAGTTTGTAAGTATTCATCTTGTTTTCCAATGTGAGGTTTGGATTTGTGTGCCCTAATTTAACCTTAGGACCAGTAGAGGGGAATGTTGTGTGCTACTAATGTTTGTGTGTGAGTGTGTTGCTTCAAAATTAAGAATGGTTGGAA

> 3141-2

TTCTTGTCATCTAATTGCAGGTTAGTTGTAAAATGTAAAATCGAATTGGACATTTTGAACCAGGTCATGGATTAATTGATTAAGATGCTAGAAGAAATTAACAAGCTGTGCCATGCAATATATCATGCATGCATGCATGAATATGATGGCTAAGTAGGTACTAATGCTAATATAGAAGAGAGAGAGAGAGAGAGAGAGAGAGAGAGAGAGAGAGAGAGATCATCTGCCTAAGTACATATTTGAAGAAGCTCTACTTAATTAACTAGAAATGGCGCCAAGCCACTCTTCTTGTTCGATCTACTGCTAGCTGCTGCTGCTGCTGCTGCTATACTACTCGATCTCTTGCTCGATCGATCAAACGCAGATTGATCAAGATCAACTCGATCTGATCATGGTAGACAGGAAATGATATATGCATGATCGCTCAGAGGCAAAGTGCGTGATTAGCCATGCAATGCCCGGTGCAACTCGATCAATGGGAGAGGAAGCTGAATGGAGAGTAGGAGTCGGAGCCCTGCGACGAGGCGACCATGTCGGCGGCGCCGCCGCTCGCCGGGAACCCGCAGGCGCCGAGCTGGTCCGCCGCGTCGCCGCCGCCCCAGAAGCCGGCGACCATCTGCGCGAGGTCGTCGACGTCCTCCCGGAGCCCCATCATGCCGTAGGCGTCGGCGTCGGAGTAGCGCCGCATGTCCTGATGATCGGCCGCGGCGCCGCCGCCCCTCGGCCGGAGGCAGCTCTCCGGCACCACGCTGCTCAGGTACCCGGAGTTGTCGTCGGCGCCGGAGAAGAGGAAGTCGTGGCCGTTCCTGTCCATGTCCAGCAGCGACGACGACATGCTGGAGCGGTGGGGATCAACCGGGACCATCACCGGCATCGTCGAGCACTCGCCCACCGACGACGCGCCCGACGCCGCGCCATGTCCGTGGTGGTGGTGGTGGTGGTGGTGGTGACCGTACGAGCCAATGTGCGGCGCCGCGCCCACGCCGCCGCCGTACTGCACCGAGGACGGCGCGGCGGCGGCAGCGGCGTACTGCGGCGCGTGGAACGGCGCGAGGAACGGCGGGTAGTTGTAGGCGGCGTGGGTGTAGACGAAGTTGGTGCGCGCCTGGGCGCCCTTCATGGACAGCGCGGCGCGGTCGTACGCCAGCGCCGCCTCCTGCGCCGTGTCGAACGTGCCCAGCCAGTGCCGCTCCTTGGTGGTCGGGTCGCGTATCTCGGCAGCGTACCTCCCCCACGGCCGCCGCCGCACGCCGAGGAACCTCCCTGGCTCCTGCGCGCGCCGCCTGCTGCGCCCCGACGGCGGCCGCTCGCTCATCGGCGACGACGGCGGCGACGGCTGGCTCGCCGGCTTCGGCGGCTCCGAGAACGCCATCAGGCTGGCCTGGCTGCTGCTGCTGCTGCTGCTACTGCCGCTGCCTCGAGTGTTCATGACCAATGCAATATTGCAATATTGCAATGCAATGCAAGAGTGAGAGTGAGAGTGAGCTAGGCTTTAGCTAAGCTAAGGTATATGAATGAGCTCGAGCTAAGCTTAGCTTGTGTGTAGTGCTCAAATGGGAGGGATTCAAGGGTGGTATTTAAATGGGTCTTGGAGAGAGAGGTCACTGTGGATGAGATGGCAGAGAGGGGTGGCATGCATGCACTGCACTTGTGTTAGCTAGACCTATAGCTGCATCATATCAAGGTTAGTTTGTAAGTATTCATCTTGTTTTCCAATGTGAGGTTTGGATTTGTGTGCCCTAATTTAACCTTAGGACCAGTAGAGGGGAATGTTGTGTGCTACTAATGTTTGTGTGTGAGTGTGTTGCTTCAAAATTAAGAATGGTTGGAA

>Taro

TTCTTGTCATCTAATTGCAGGTTAGTTGTAAAATGTAAAATCGAATTGGACATTTTGAACCAGGTCATGGATTAATTGATTAAGATGCTAGAAGAAATTAACAAGCTGTGCCATGCAATATATCATGCATGCATGCATGAATATGATGGCTAAGTAGGTACTAATGCTAATATAGAAGAGAGAGAGAGAGAGAGAGAGAGAGAGAGAGAGAGAGAGAGATCATCTGCCTAAGTACATATTTGAAGAAGCTCTACTTAATTAACTAGAAATGGCGCCAAGCCACTCTTCTTGTTCGATCTACTGCTAGCTGCTGCTGCTGCTGCTGCTATACTACTCGATCTCTTGCTCGATCGATCAAACGCAGATTGATCAAGATCAACTCGATCTGATCATGGTAGACAGGAAATGATATATGCATGATCGCTCAGAGGCAAAGTGCGTGATTAGCCATGCAATGCCCGGTGCAACTCGATCAATGGGAGAGGAAGCTGAATGGAGAGTAGGAGTCGGAGCCCTGCGACGAGGCGACCATGTCGGCGGCGCCGCCGCTCGCCGGGAACCCGCAGGCGCCGAGCTGGTCCGCCGCGTCGCCGCCGCCCCAGAAGCCGGCGACCATCTGCGCGAGGTCGTCGACGTCCTCCCGGAGCCCCATCATGCCGTAGGCGTCGGCGTCGGAGTAGCGCCGCATGTCCTGATGATCGGCCGCGGCGCCGCCGCCCCTCGGCCGGAGGCAGCTCTCCGGCACCACGCTGCTCAGGTACCCGGAGTTGTCGTCGGCGCCGGAGAAGAGGAAGTCGTGGCCGTTCCTGTCCATGTCCAGCAGCGACGACGACATGCTGGAGCGGTGGGGATCAACCGGGACCATCACCGGCATCGTCGAGCACTCGCCCACCGACGACGCGCCCGACGCCGCGCCATGTCCGTGGTGGTGGTGGTGGTGGTGGTGGTGACCGTACGAGCCAATGTGCGGCGCCGCGCCCACGCCGCCGCCGTACTGCACCGAGGACGGCGCGGCGGCGGCAGCGGCGTACTGCGGCGCGTGGAACGGCGCGAGGAACGGCGGGTAGTTGTAGGCGGCGTGGGTGTAGACGAAGTTGGTGCGCGCCTGGGCGCCCTTCATGGACAGCGCGGCGCGGTCGTACGCCAGCGCCGCCTCCTGCGCCGTGTCGAACGTGCCCAGCCAGTGCCGCTCCTTGGTGGTCGGGTCGCGTATCTCGGCAGCGTACCTCCCCCACGGCCGCCGCCGCACGCCGAGGAACCTCCCTGGCTCCTGCGCGCGCCGCCTGCTGCGCCCCGACGGCGGCCGCTCGCTCATCGGCGACGACGGCGGCGACGGCTGGCTCGCCGGCTTCGGCGGCTCCGAGAACGCCATCAGGCTGGCCTGGCTGCTGCTGCTGCTGCTGCTACTGCCGCTGCCTCGAGTGTTCATGACCAATGCAATATTGCAATATTGCAATGCAATGCAAGAGTGAGAGTGAGAGTGAGCTAGGCTTTAGCTAAGCTAAGGTATATGAATGAGCTCGAGCTAAGCTTAGCTTGTGTGTAGTGCTCAAATGGGAGGGATTCAAGGGTGGTATTTAAATGGGTCTTGGAGAGAGAGGTCACTGTGGATGAGATGGCAGAGAGGGGTGGCATGCATGCACTGCACTTGTGTTAGCTAGACCTATAGCTGCATCATATCAAGGTTAGTTTGTAAGTATTCATCTTGTTTTCCAATGTGAGGTTTGGATTTGTGTGCCCTAATTTAACCTTAGGACCAGTAGAGGGGAATGTTGTGTGCTACTAATGTTTGTGTGTGAGTGTGTTGCTTCAAAATTAAGAATGGTTGGAA

>Ai-Zi-Dao

TTCTTGTCATCTAATTGCAGGTTAGTTGTAAAATGTAAAATCGAATTGGACATTTTGAACCAGGTCATGGATTAATTGATTAAGATGCTAGAAGAAATTAACAAGCTGTGCCATGCAATATATCATGCATGCATGCATGAATATGATGGCTAAGTAGGTACTAATGCTAATATAGAAGAGAGAGAGAGAGAGAGAGAGAGAGAGAGAGAGAGAGAGAGATCATCTGCCTAAGTACATATTTGAAGAAGCTCTACTTAATTAACTAGAAATGGCGCCAAGCCACTCTTCTTGTTCGATCTACTGCTAGCTGCTGCTGCTGCTGCTGCTATACTACTCGATCTCTTGCTCGATCGATCAAACGCAGATTGATCAAGATCAACTCGATCTGATCATGGTAGACAGGAAATGATATATGCATGATCGCTCAGAGGCAAAGTGCGTGATTAGCCATGCAATGCCCGGTGCAACTCGATCAATGGGAGAGGAAGCTGAATGGAGAGTAGGAGTCGGAGCCCTGCGACGAGGCGACCATGTCGGCGGCGCCGCCGCTCGCCGGGAACCCGCAGGCGCCGAGCTGGTCCGCCGCGTCGCCGCCGCCCCAGAAGCCGGCGACCATCTGCGCGAGGTCGTCGACGTCCTCCCGGAGCCCCATCATGCCGTAGGCGTCGGCGTCGGAGTAGCGCCGCATGTCCTGATGATCGGCCGCGGCGCCGCCGCCCCTCGGCCGGAGGCAGCTCTCCGGCACCACGCTGCTCAGGTACCCGGAGTTGTCGTCGGCGCCGGAGAAGAGGAAGTCGTGGCCGTTCCTGTCCATGTCCAGCAGCGACGACGACATGCTGGAGCGGTGGGGATCAACCGGGACCATCACCGGCATCGTCGAGCACTCGCCCACCGACGACGCGCCCGACGCCGCGCCATGTCCGTGGTGGTGGTGGTGGTGGTGGTGGTGACCGTACGAGCCAATGTGCGGCGCCGCGCCCACGCCGCCGCCGTACTGCACCGAGGACGGCGCGGCGGCGGCAGCGGCGTACTGCGGCGCGTGGAACGGCGCGAGGAACGGCGGGTAGTTGTAGGCGGCGTGGGTGTAGACGAAGTTGGTGCGCGCCTGGGCGCCCTTCATGGACAGCGCGGCGCGGTCGTACGCCAGCGCCGCCTCCTGCGCCGTGTCGAACGTGCCCAGCCAGTGCCGCTCCTTGGTGGTCGGGTCGCGTATCTCGGCAGCGTACCTCCCCCACGGCCGCCGCCGCACGCCGAGGAACCTCCCTGGCTCCTGCGCGCGCCGCCTGCTGCGCCCCGACGGCGGCCGCTCGCTCATCGGCGACGACGGCGGCGACGGCTGGCTCGCCGGCTTCGGCGGCTCCGAGAACGCCATCAGGCTGGCCTGGCTGCTGCTGCTGCTGCTGCTACTGCCGCTGCCTCGAGTGTTCATGACCAATGCAATATTGCAATATTGCAATGCAATGCAAGAGTGAGAGTGAGAGTGAGCTAGGCTTTAGCTAAGCTAAGGTATATGAATGAGCTCGAGCTAAGCTTAGCTTGTGTGTAGTGCTCAAATGGGAGGGATTCAAGGGTGGTATTTAAATGGGTCTTGGAGAGAGAGGTCACTGTGGATGAGATGGCAGAGAGGGGTGGCATGCATGCACTGCACTTGTGTTAGCTAGACCTATAGCTGCATCATATCAAGGTTAGTTTGTAAGTATTCATCTTGTTTTCCAATGTGAGGTTTGGATTTGTGTGCCCTAATTTAACCTTAGGACCAGTAGAGGGGAATGTTGTGTGCTACTAATGTTTGTGTGTGAGTGTGTTGCTTCAAAATTAAGAATGGTTGGAA

>Gz 5379

TTCTTGTCATCTAATTGCAGGTTAGTTGTAAAATGTAAAATCGAATTGGACATTTTGAACCAGGTCATGGATTAATTGATTAAGATGCTAGAAGAAATTAACAAGCTGTGCCATGCAATATATCATGCATGCATGCATGAATATGCATGATGGCTAAGTAGGTACTAATGCTAATATAGAAGAGAGAGAGAGAGAGAGAGAGAGAGAGAGATCATCTGCCTAAGTACATATTTGAAGAAGCTCTACTTAATTAACTAGAAATGGCGCCAAGCCACTCTTCTTGTTCGATCTACTGCTAGCTGCTGCTGCTGCTGCTGCTATACTACTCGATCTCTTGCTCGATCGATCAAACGCAGATTGATCAAGATCAACTCGATCTGATCATGGTAGACAGGAAATGATATATGCATGATCGCTCAGAGGCAAAGTGCGTGATTAGCCATGCAATGCCCGGTGCAACTCGATCAATGGGAGAGGAAGCTGAATGGAGAGTAGGAGTCGGAGCCCTGCGACGAGGCGACCATGTCGGCGGCGCCGCCGCTCGCCGGGAACCCGCAGGCGCCGAGCTGGTCCGCCGCGTCGCCGCCGCCCCAGAAGCCGGCGACCATCTGCGCGAGGTCGTCGACGTCCTCCCGGAGCCCCATCATGCCGTAGGCGTCGGCGTCGGAGTAGCGCCGCATGTCCTGATGATCGGCCGCGGCGCCGCCGCCCCTCGGCCGGAGGCAGCTCTCCGGCACCACGCTGCTCAGGTACCCGGAGTTGTCGTCGGCGCCGGAGAAGAGGAAGTCGTGGCCGTTCCTGTCCATGTCCAGCAGCGACGACGACATGCTGGAGCGGTGGGGATCAACCGGGACCATCACCGGCATCGTCGAGCACTCGCCCACCGACGACGCGCCCGACGCCGCGCCATGTCCGTGGTGGTGGTGGTGGTGGTGGTGGTGACCGTACGAGCCAATGTGCGGCGCCGCGCCCACGCCGCCGCCGTACTGCACCGAGGACGGCGCGGCGGCGGCAGCGGCGTACTGCGGCGCGTGGAACGGCGCGAGGAACGGCGGGTAGTTGTAGGCAGCGTGGGTGTAGACGAAGTTGGTGCGCGCCTGGGCGCCCTTCATGGACAGCGCGGCGCGGTCGTACGCCAGCGCCGCCTCCTGCGCCGTGTCGAACGTGCCCAGCCAGTGCCGCTCCTTGGTGGTCGGGTCGCGTATCTCGGCAGCGTACCTCCCCCACGGCCGCCGCCGCACGCCGAGGAACCTCCCTGGCTCCTGCGCGCGCCGCCTGCTGCGCCCCGACGGCGGCCGCTCGCTCATCGGCGACGACGGCGGCGACGGCTGGCTCGCCGGCTTCGGCGGCTCCGAGAACGCCATCAGGCTGGCCTGGCTGCTGCTGCTGCTGCTGCTACTGCCGCTGCCTCGAGTGTTCATGACCAATGCAATATTGCAATATTGCAATGCAATGCAAGAGTGAGAGTGAGAGTGAGCTAGGCTTTAGCTAAGCTAAGGTATATGAATGAGCTCGAGCTAAGCTTAGCTTGTGTGTAGTGCTCAAATGGGAGGGATTCAAGGGTGGTATTTAAATGGGTCTTGGAGAGAGAGGTCACTGTGGATGAGATGGCAGAGAGGGGTGGCATGCATGCACTGCACTTGTGTTAGCTAGACCTATAGCTGCATCATATCAAGGTTAGTTTGTAAGTATTCATCTTGTTTTCCAATGTGAGGTTTGGATTTGTGTGCCCTAATTTAACCTTAGGACCAGTAGAGGGGAATGTTGTGTGCTACTAATGTTTGTGTGTGAGTGTGTTGCTTCAAAATTAAGAATGGTTGGAA

>Adan

TTCTTGTCATCTAATTGCAGGTTAGTTGTAAAATGTAAAATCGAATTGGACATTTTGAACCAGGTCATGGATTAATTGATTAAGATGCTAGAAGAAATTAACAAGCTGTGCCATGCAATATATCATGCATGCATGCATGAATATGATGGCTAAGTAGGTACTAATGCTAATATAGAAGAGAGAGAGAGAGAGAGAGAGAGAGAGAGAGAGAGAGAGATCATCTGCCTAAGTACATATTTGAAGAAGCTCTACTTAATTAACTAGAAATGGCGCCAAGCCACTCTTCTTGTTCGATCTACTGCTAGCTGCTGCTGCTGCTGCTGCTATACTACTCGATCTCTTGCTCGATCGATCAAACGCAGATTGATCAAGATCAACTCGATCTGATCATGGTAGACAGGAAATGATATATGCATGATCGCTCAGAGGCAAAGTGCGTGATTAGCCATGCAATGCCCGGTGCAACTCGATCAATGGGAGAGGAAGCTGAATGGAGAGTAGGAGTCGGAGCCCTGCGACGAGGCGACCATGTCGGCGGCGCCGCCGCTCGCCGGGAACCCGCAGGCGCCGAGCTGGTCCGCCGCGTCGCCGCCGCCCCAGAAGCCGGCGACCATCTGCGCGAGGTCGTCGACGTCCTCCCGGAGCCCCATCATGCCGTAGGCGTCGGCGTCGGAGTAGCGCCGCATGTCCTGATGATCGGCCGCGGCGCCGCCGCCCCTCGGCCGGAGGCAGCTCTCCGGCACCACGCTGCTCAGGTACCCGGAGTTGTCGTCGGCGCCGGAGAAGAGGAAGTCGTGGCCGTTCCTGTCCATGTCCAGCAGCGACGACGACATGCTGGAGCGGTGGGGATCAACCGGGACCATCACCGGCATCGTCGAGCACTCGCCCACCGACGACGCGCCCGACGCCGCGCCATGTCCGTGGTGGTGGTGGTGGTGGTGGTGGTGACCGTACGAGCCAATGTGCGGCGCCGCGCCCACGCCGCCGCCGTACTGCACCGAGGACGGCGCGGCGGCGGCAGCGGCGTACTGCGGCGCGTGGAACGGCGCGAGGAACGGCGGGTAGTTGTAGGCGGCGTGGGTGTAGACGAAGTTGGTGCGCGCCTGGGCGCCCTTCATGGACAGCGCGGCGCGGTCGTACGCCAGCGCCGCCTCCTGCGCCGTGTCGAACGTGCCCAGCCAGTGCCGCTCCTTGGTGGTCGGGTCGCGTATCTCGGCAGCGTACCTCCCCCACGGCCGCCGCCGCACGCCGAGGAACCTCCCTGGCTCCTGCGCGCGCCGCCTGCTGCGCCCCGACGGCGGCCGCTCGCTCATCGGCGACGACGGCGGCGACGGCTGGCTCGCCGGCTTCGGCGGCTCCGAGAACGCCATCAGGCTGGCCTGGCTGCTGCTGCTGCTGCTGCTACTGCCGCTGCCTCGAGTGTTCATGACCAATGCAATATTGCAATATTGCAATGCAATGCAAGAGTGAGAGTGAGAGTGAGCTAGGCTTTAGCTAAGCTAAGGTATATGAATGAGCTCGAGCTAAGCTTAGCTTGTGTGTAGTGCTCAAATGGGAGGGATTCAAGGGTGGTATTTAAATGGGTCTTGGAGAGAGAGGTCACTGTGGATGAGATGGCAGAGAGGGGTGGCATGCATGCACTGCACTTGTGTTAGCTAGACCTATAGCTGCATCATATCAAGGTTAGTTTGTAAGTATTCATCTTGTTTTCCAATGTGAGGTTTGGATTTGTGTGCCCTAATTTAACCTTAGGACCAGTAGAGGGGAATGTTGTGTGCTACTAATGTTTGTGTGTGAGTGTGTTGCTTCAAAATTAAGAATGGTTGGAA

>ATM5

TTCTTGTCATCTAATTGCAGGTTAGTTGTAAAATGTAAAATCGAATTGGACATTTTGAACCAGGTCATGGATTAATTGATTAAGATGCTAGAAGAAATTAACAAGCTGTGCCATGCAATATATCATGCATGCATGCATGAATATGATGGCTAAGTAGGTACTAATGCTAATATAGAAGAGAGAGAGAGAGAGAGAGAGAGAGAGAGAGAGAGAGAGATCATCTGCCTAAGTACATATTTGAAGAAGCTCTACTTAATTAACTAGAAATGGCGCCAAGCCACTCTTCTTGTTCGATCTACTGCTAGCTGCTGCTGCTGCTGCTGCTATACTACTCGATCTCTTGCTCGATCGATCAAACGCAGATTGATCAAGATCAACTCGATCTGATCATGGTAGACAGGAAATGATATATGCATGATCGCTCAGAGGCAAAGTGCGTGATTAGCCATGCAATGCCCGGTGCAACTCGATCAATGGGAGAGGAAGCTGAATGGAGAGTAGGAGTCGGAGCCCTGCGACGAGGCGACCATGTCGGCGGCGCCGCCGCTCGCCGGGAACCCGCAGGCGCCGAGCTGGTCCGCCGCGTCGCCGCCGCCCCAGAAGCCGGCGACCATCTGCGCGAGGTCGTCGACGTCCTCCCGGAGCCCCATCATGCCGTAGGCGTCGGCGTCGGAGTAGCGCCGCATGTCCTGATGATCGGCCGCGGCGCCGCCGCCCCTCGGCCGGAGGCAGCTCTCCGGCACCACGCTGCTCAGGTACCCGGAGTTGTCGTCGGCGCCGGAGAAGAGGAAGTCGTGGCCGTTCCTGTCCATGTCCAGCAGCGACGACGACATGCTGGAGCGGTGGGGATCAACCGGGACCATCACCGGCATCGTCGAGCACTCGCCCACCGACGACGCGCCCGACGCCGCGCCATGTCCGTGGTGGTGGTGGTGGTGGTGGTGGTGACCGTACGAGCCAATGTGCGGCGCCGCGCCCACGCCGCCGCCGTACTGCACCGAGGACGGCGCGGCGGCGGCAGCGGCGTACTGCGGCGCGTGGAACGGCGCGAGGAACGGCGGGTAGTTGTAGGCGGCGTGGGTGTAGACGAAGTTGGTGCGCGCCTGGGCGCCCTTCATGGACAGCGCGGCGCGGTCGTACGCCAGCGCCGCCTCCTGCGCCGTGTCGAACGTGCCCAGCCAGTGCCGCTCCTTGGTGGTCGGGTCGCGTATCTCGGCAGCGTACCTCCCCCACGGCCGCCGCCGCACGCCGAGGAACCTCCCTGGCTCCTGCGCGCGCCGCCTGCTGCGCCCCGACGGCGGCCGCTCGCTCATCGGCGACGACGGCGGCGACGGCTGGCTCGCCGGCTTCGGCGGCTCCGAGAACGCCATCAGGCTGGCCTGGCTGCTGCTGCTGCTGCTGCTACTGCCGCTGCCTCGAGTGTTCATGACCAATGCAATATTGCAATATTGCAATGCAATGCAAGAGTGAGAGTGAGAGTGAGCTAGGCTTTAGCTAAGCTAAGGTATATGAATGAGCTCGAGCTAAGCTTAGCTTGTGTGTAGTGCTCAAATGGGAGGGATTCAAGGGTGGTATTTAAATGGGTCTTGGAGAGAGAGGTCACTGTGGATGAGATGGCAGAGAGGGGTGGCATGCATGCACTGCACTTGTGTTAGCTAGACCTATAGCTGCATCATATCAAGGTTAGTTTGTAAGTATTCATCTTGTTTTCCAATGTGAGGTTTGGATTTGTGTGCCCTAATTTAACCTTAGGACCAGTAGAGGGGAATGTTGTGTGCTACTAATGTTTGTGTGTGAGTGTGTTGCTTCAAAATTAAGAATGGTTGGAA

>Kuantung 154

TTCTTGTCATCTAATTGCAGGTTAGTTGTAAAATGTAAAATCGAATTGGACATTTTGAACCAGGTCATGGATTAATTGATTAAGATGCTAGAAGAAATTAACAAGCTGTGCCATGCAATATATCATGCATGCATGCATGAATATGATGGCTAAGTAGGTACTAATGCTAATATAGAAGAGAGAGAGAGAGAGAGAGAGAGAGAGAGAGAGAGAGAGATCATCTGCCTAAGTACATATTTGAAGAAGCTCTACTTAATTAACTAGAAATGGCGCCAAGCCACTCTTCTTGTTCGATCTACTGCTAGCTGCTGCTGCTGCTGCTGCTATACTACTCGATCTCTTGCTCGATCGATCAAACGCAGATTGATCAAGATCAACTCGATCTGATCATGGTAGACAGGAAATGATATATGCATGATCGCTCAGAGGCAAAGTGCGTGATTAGCCATGCAATGCCCGGTGCAACTCGATCAATGGGAGAGGAAGCTGAATGGAGAGTAGGAGTCGGAGCCCTGCGACGAGGCGACCATGTCGGCGGCGCCGCCGCTCGCCGGGAACCCGCAGGCGCCGAGCTGGTCCGCCGCGTCGCCGCCGCCCCAGAAGCCGGCGACCATCTGCGCGAGGTCGTCGACGTCCTCCCGGAGCCCCATCATGCCGTAGGCGTCGGCGTCGGAGTAGCGCCGCATGTCCTGATGATCGGCCGCGGCGCCGCCGCCCCTCGGCCGGAGGCAGCTCTCCGGCACCACGCTGCTCAGGTACCCGGAGTTGTCGTCGGCGCCGGAGAAGAGGAAGTCGTGGCCGTTCCTGTCCATGTCCAGCAGCGACGACGACATGCTGGAGCGGTGGGGATCAACCGGGACCATCACCGGCATCGTCGAGCACTCGCCCACCGACGACGCGCCCGACGCCGCGCCATGTCCGTGGTGGTGGTGGTGGTGGTGGTGGTGACCGTACGAGCCAATGTGCGGCGCCGCGCCCACGCCGCCGCCGTACTGCACCGAGGACGGCGCGGCGGCGGCAGCGGCGTACTGCGGCGCGTGGAACGGCGCGAGGAACGGCGGGTAGTTGTAGGCGGCGTGGGTGTAGACGAAGTTGGTGCGCGCCTGGGCGCCCTTCATGGACAGCGCGGCGCGGTCGTACGCCAGCGCCGCCTCCTGCGCCGTGTCGAACGTGCCCAGCCAGTGCCGCTCCTTGGTGGTCGGGTCGCGTATCTCGGCAGCGTACCTCCCCCACGGCCGCCGCCGCACGCCGAGGAACCTCCCTGGCTCCTGCGCGCGCCGCCTGCTGCGCCCCGACGGCGGCCGCTCGCTCATCGGCGACGACGGCGGCGACGGCTGGCTCGCCGGCTTCGGCGGCTCCGAGAACGCCATCAGGCTGGCCTGGCTGCTGCTGCTGCTGCTGCTACTGCCGCTGCCTCGAGTGTTCATGACCAATGCAATATTGCAATATTGCAATGCAATGCAAGAGTGAGAGTGAGAGTGAGCTAGGCTTTAGCTAAGCTAAGGTATATGAATGAGCTCGAGCTAAGCTTAGCTTGTGTGTAGTGCTCAAATGGGAGGGATTCAAGGGTGGTATTTAAATGGGTCTTGGAGAGAGAGGTCACTGTGGATGAGATGGCAGAGAGGGGTGGCATGCATGCACTGCACTTGTGTTAGCTAGACCTATAGCTGCATCATATCAAGGTTAGTTTGTAAGTATTCATCTTGTTTTCCAATGTGAGGTTTGGATTTGTGTGCCCTAATTTAACCTTAGGACCAGTAGAGGGGAATGTTGTGTGCTACTAATGTTTGTGTGTGAGTGTGTTGCTTCAAAATTAAGAATGGTTGGAA

>NER 10A KEAN 2

TTCTCGCGGCGCCATTCTTGTCATCTAATTGCAGGTTAGTTGTAAAATGTAAAATCGAATTGGACATTTTGAACCAGGTCATGGATTAATTGATTAAGATGCTAGAAGAAATTAACAAGCTGTGCCATGCAATATATCATGCATGCATGCATGAATATGATGGCTAAGTAGGTACTAATGCTAATATAGAAGAGAGAGAGAGAGAGAGAGAGAGAGAGAGAGAGAGAGAGATCATCTGCCTAAGTACATATTTGAAGAAGCTCTACTTAATTAACTAGAAATGGCGCCAAGCCACTCTTCTTGTTCGATCTACTGCTAGCTGCTGCTGCTGCTGCTGCTATACTACTCGATCTCTTGCTCGATCGATCAAACGCAGATTGATCAAGATCAACTCGATCTGATCATGGTAGACAGGAAATGATATATGCATGATCGCTCAGAGGCAAAGTGCGTGATTAGCCATGCAATGCCCGGTGCAACTCGATCAATGGGAGAGGAAGCTGAATGGAGAGTAGGAGTCGGAGCCCTGCGACGAGGCGACCATGTCGGCGGCGCCGCCGCTCGCCGGGAACCCGCAGGCGCCGAGCTGGTCCGCCGCGTCGCCGCCGCCCCAGAAGCCGGCGACCATCTGCGCGAGGTCGTCGACGTCCTCCCGGAGCCCCATCATGCCGTAGGCGTCGGCGTCGGAGTAGCGCCGCATGTCCTGATGATCGGCCGCGGCGCCGCCGCCCCTCGGCCGGAGGCAGCTCTCCGGCACCACGCTGCTCAGGTACCCGGAGTTGTCGTCGGCGCCGGAGAAGAGGAAGTCGTGGCCGTTCCTGTCCATGTCCAGCAGCGACGACGACATGCTGGAGCGGTGGGGATCAACCGGGACCATCACCGGCATCGTCGAGCACTCGCCCACCGACGACGCGCCCGACGCCGCGCCATGTCCGTGGTGGTGGTGGTGGTGGTGGTGGTGACCGTACGAGCCAATGTGCGGCGCCGCGCCCACGCCGCCGCCGTACTGCACCGAGGACGGCGCGGCGGCGGCAGCGGCGTACTGCGGCGCGTGGAACGGCGCGAGGAACGGCGGGTAGTTGTAGGCGGCGTGGGTGTAGACGAAGTTGGTGCGCGCCTGGGCGCCCTTCATGGACAGCGCGGCGCGGTCGTACGCCAGCGCCGCCTCCTGCGCCGTGTCGAACGTGCCCAGCCAGTGCCGCTCCTTGGTGGTCGGGTCGCGTATCTCGGCAGCGTACCTCCCCCACGGCCGCCGCCGCACGCCGAGGAACCTCCCTGGCTCCTGCGCGCGCCGCCTGCTGCGCCCCGACGGCGGCCGCTCGCTCATCGGCGACGACGGCGGCGACGGCTGGCTCGCCGGCTTCGGCGGCTCCGAGAACGCCATCAGGCTGGCCTGGCTGCTGCTGCTGCTGCTGCTACTGCCGCTGCCTCGAGTGTTCATGACCAATGCAATATTGCAATATTGCAATGCAATGCAAGAGTGAGAGTGAGAGTGAGCTAGGCTTTAGCTAAGCTAAGGTATATGAATGAGCTCGAGCTAAGCTTAGCTTGTGTGTAGTGCTCAAATGGGAGGGATTCAAGGGTGGTATTTAAATGGGTCTTGGAGAGAGAGGTCACTGTGGATGAGATGGCAGAGAGGGGTGGCATGCATGCACTGCACTTGTGTTAGCTAGACCTATAGCTGCATCATATCAAGGTTAGTTTGTAAGTATTCATCTTGTTTTCCAATGTGAGGTTTGGATTTGTGTGCCCTAATTTAACCTTAGGACCAGTAGAGGGGAATGTTGTGTGCTACTAATGTTTGTGTGTGAGTGTGTTGCTTCAAAATTAA

>TN13

TTCTGAACCTGACGTACGCAAGAATCAGCATCAAGTACCTGACGAAATGGTTGCTTGGCTGACACTTGTCCAGTGTGAGCTTTCCGTTGAACTGTCAATTGCTTCCCTCCTTTTTCCCAGCTTTTCTGTACTTGTTGCCCATGTCGTTCAGTTCCTCATCTTCTTCAATTTTCTTCTCCATTTCTCAATCCATTGTCAGTACTACATATGTGTGTACTTCTCGCGGCGCCATTCTTGTCATCTAATTGCAGGTTAGTTGTAAAATGTAAAATCGAATTGGACATTTTGAACCAGGTCATGGATTAATTGATTAAGATGCTAGAAGAAATTAACAAGCTGTGCCATGCAATATATCATGCATGCATGCATGAATATGATGGCTAAGTAGGTACTAATGCTAATATAGAAGAGAGAGAGAGAGAGAGAGAGAGAGAGAGAGAGAGAGAGAGATCATCTGCCTAAGTACATATTTGAAGAAGCTCTACTTAATTAACTAGAAATGGCGCCAAGCCACTCTTCTTGTTCGATCTACTGCTAGCTGCTGCTGCTGCTGCTGCTATACTACTCGATCTCTTGCTCGATCGATCAAACGCAGATTGATCAAGATCAACTCGATCTGATCATGGTAGACAGGAAATGATATATGCATGATCGCTCAGAGGCAAAGTGCGTGATTAGCCATGCAATGCCCGGTGCAACTCGATCAATGGGAGAGGAAGCTGAATGGAGAGTAGGAGTCGGAGCCCTGCGACGAGGCGACCATGTCGGCGGCGCCGCCGCTCGCCGGGAACCCGCAGGCGCCGAGCTGGTCCGCCGCGTCGCCGCCGCCCCAGAAGCCGGCGACCATCTGCGCGAGGTCGTCGACGTCCTCCCGGAGCCCCATCATGCCGTAGGCGTCGGCGTCGGAGTAGCGCCGCATGTCCTGATGATCGGCCGCGGCGCCGCCGCCCCTCGGCCGGAGGCAGCTCTCCGGCACCACGCTGCTCAGGTACCCGGAGTTGTCGTCGGCGCCGGAGAAGAGGAAGTCGTGGCCGTTCCTGTCCATGTCCAGCAGCGACGACGACATGCTGGAGCGGTGGGGATCAACCGGGACCATCACCGGCATCGTCGAGCACTCGCCCACCGACGACGCGCCCGACGCCGCGCCATGTCCGTGGTGGTGGTGGTGGTGGTGGTGGTGACCGTACGAGCCAATGTGCGGCGCCGCGCCCACGCCGCCGCCGTACTGCACCGAGGACGGCGCGGCGGCGGCAGCGGCGTACTGCGGCGCGTGGAACGGCGCGAGGAACGGCGGGTAGTTGTAGGCGGCGTGGGTGTAGACGAAGTTGGTGCGCGCCTGGGCGCCCTTCATGGACAGCGCGGCGCGGTCGTACGCCAGCGCCGCCTCCTGCGCCGTGTCGAACGTGCCCAGCCAGTGCCGCTCCTTGGTGGTCGGGTCGCGTATCTCGGCAGCGTACCTCCCCCACGGCCGCCGCCGCACGCCGAGGAACCTCCCTGGCTCCTGCGCGCGCCGCCTGCTGCGCCCCGACGGCGGCCGCTCGCTCATCGGCGACGACGGCGGCGACGGCTGGCTCGCCGGCTTCGGCGGCTCCGAGAACGCCATCAGGCTGGCCTGGCTGCTGCTGCTGCTGCTGCTACTGCCGCTGCCTCGAGTGTTCATGACCAATGCAATATTGCAATATTGCAATGCAATGCAAGAGTGAGAGTGAGAGTGAGCTAGGCTTTAGCTAAGCTAAGGTATATGAATGAGCTCGAGCTAAGCTTAGCTTGTGTGTAGTGCTCAAATGGGAGGGATTCAAGGGTGGTATTTAAATGGGTCTTGGAGAGAGAGGTCACTGTGGATGAGATGGCAGAGAGGGGTGGCATGCATGCACTGCACTTGTGTTAGCTAGACCTATAGCTGCATCATATCAAGGTTAGTTTGTAAGTATTCATCTTGTTTTCCAATGTGAGGTTTGGATTTGTGTGCCCTAATTTAACCTTAGGACCAGTAGAGGGGAATGTTGTGTGCTACTAATGTTTGTGTGTGAGTGTGTTGCTTCAAAATTAAGAATGGTTGGAATGTTCTCCCCTTAGTTTTCATACACTTCATTTATGATGACAATGCATGCTAGCTCTCTACCACACATGTATGCAAAGTTATCATCCTATAGGTATAATATGGGGGTATGGCATACAACATATACAGTCCAACACCAGGCAGCATCTGAAAGTGCCACATTAATCAAGCTAGTGACCAAGAAGCCCCTGCCAAAGCAACTCTTTAAATTTTGCTGGTCCTACATATATTCTAATTGTGGTTTAATTAAGCTAGTTCTAATAATTTCTGCCTTAAGCTTGCATGGAGTCATGATTCACTCCTGAGTTAGACAGTATTACAAACTAATCAGATAATGAAAAGATGCCTGCCACTGGGTTAGGAAAAGGATCAGGGAAAGAAGAGAACATATGTAACCTAGTCATCCACCTTTTTAACAATTGTAATTTGTGTGCTCCAATAAATTTTAAAAAATGAAATCTTTGCTCCAAGATACTACTTCTATAGCTATATATTATGATACATGTCAAAATGCTACTACACACAATAATGCCCATTTTTTACAGGCCATATGGCTTTGCTTTCCTTCGTATCCATGTGCTTGCTTGCGCAATACATGCATGCATGCAAGTTAAAAAGATCAAACAAAAAAAAACCTTAAAGCTATACTTATATTTGCCTCATTGCATAAGCACTTAAGAAGCTTTCAAATGGAGTGGTTAGCTTGCCCTCAAAACTAGATGAACAACAGTGTGAAATGTGTAGAAGGGCACTCTTTCTCATGGCATTCCCTGTGTAATTTTTTTGGTATATTTCTTTTGGTTCCATTCATGCAACCTTGAGTGACACTCACATGAGGTGAGGGTCCAGTGGGTCTCCCCTTCTTTGACTCCTTTTCTCTAGTGAAGCTTTGCTTTGTTCATTTGCATGAGCTAGCTAGACAGATTAATTAAAATAAAATGCTTGTAACGATCATTATCCCTCACAATTCCCATTGAATTCTTGCCGATAATTTAATCACAATGGACATTCTATAGATTAGTGCGCATGTGCGTGCCGGTGTTAGGTTCAAATGAGAACAAATCGAAAGGAGTGATATTAAATCAGCAAAACAAGAGAACTATCCCTTTCATGTCTCTCTAGAGCCATTTTAATAAACCTAATAGATGCCTTTTTGGAGTCAAAAAGAAAGAGAGAGAGCTAGAGCTATAGCCAAACCGGAGAGAGACGAATTGAAGACGTCGTCGAGGTGGTAATGCATCCAATGTATATAGCAACATCAACTCGACCGACTGTTAAGTGTGTGCCATGTGAGGTTTAAGCAAAACAACAACTGAGGTGGATACTACTTTTCACCGGCCACCTGTCTAATTTCTCCTCCACATTAATTAATTAGCTGTTGTGTAATAGCATCTTGTAAAAGGCTTCAAATAGAGAACATCACATAATCTATACTATCTTCGTTTCAAGTTAATTATAAGACATTTTAGCATTGCACACATTCATATAGGTCTTAGAACCTGAAACGGATGAAGTATCAATCTAGTGGATATGCTGATTTTTTTATTTCTTATGAAAAAAATGTTTGCAATTGATTAATTAAGCATATATAATGCAGAGTGAAATTAGCACTGTTAATTCCTCTTGTTTGTTTAACTTTGGAGCATCTAGAAAAGGCTTTTCTTGGAGTGTACAAAGCCTTGACTTCCATCCCTCATGAGAACAATGAGAATTTGGATTCTTATGGAGAGCTGCATTTGGGGCAATTCTTGCATCTAATGCCTTAGCTTCCTACAAATGCAAGTATAGTACAATGAGAGGAGAGCTACATGTGTAGAGTGCATGCAGAGAGAGAGATCTTATCTGATGACCTTGACTTCCCCTACTACACCCCTCTCTTGTGTGTGAATTTGGCATATATGTGTTGGCCTGTGAAAATATTGCATTGCAAGATGGGGTCAGGTCAAGCCCTAGCTAGACATCTGAAAAGGTGTGAGGAGGAGAAGGTGGTGTTCAACTGGAGATGGGGAGAAAAAAGGAGAAATCTAAGGGCAAGGAGGCTCCACACAATGGCCTTGACAAGATGTACTAGAAATGCATAAGTTAGTTAATTTGCAGAGAGACCAGATTAAACTGATAATTATAATTATGATGGAAACGAGCACAGCACACAAGACACATGTTCTTGTCTATTCCTTAGGGTCACACCCGGGTTTTGGGGGTGGCCTTTGCACTACTTTGACTTTAGACCTCCCTTATAGAACCAACAAGTTTTGTGGAAAAGACACACACCCCAAAAAAATAATATGTATGCTAGGACAGTGTGGGTGTGGGTGTTTGTGTGTGTGTGTGTGTATGTGCAATTGTAGAAGTATGCAAGGCAGTTCACTAAACATAATCAAGGGAAAGGTAGAAAAAGACCACTTGGGGCATGCACATTTGTCTCACCAAGTTGTGGTTTGAATAAAAGGAGATCAGACAGAGTTTAGTAGTGAAAAGGTGCACTCACAATTCACAGAACAAAAGCTCCACATAGAACGCTTACTTTAATCATTTCGAATTTGAACTCTGATTTTCAATTGTTGATTCTATGCTAATTCCAAAAAACTTCCATATATTAGATATTTTGGTGGATATCATTCCAATTGTATTGGTACCTTAACAATTGTCAGTGCTTGCTACGAAAACTCTGTTTCTAGTTTTCAGATAATTGATGGCAATTAATTAGTACTGCATCAAGTTCAAATCTTCAGCTCGCAGATTGGACAAGGTTATTGTACTGGTCAAACAGTTCGATCTCACAGTGTTAGTGTTGCTGTTGTCTATGTGATTGATTACTAAGTTATTAATTAAACAAGCGACCAAGTACCAAGAGGAGAGTGCACTACAGCACACTTGTCCCATTTTATATCGACCACCAAAAATGACAAGCAATTACGCAACTGAAGATGATGATTTGGCACTGATCTAACGAATGAAAGATTGTTCCCACTCTTCAAGTTCCTATGATCCATGTTGATTGGTCTGATCATCCCCAATGGCATTGTCCTGCATTTGACTGAACAATGATTAACATAAGCATGCATGGTTTCTTGTTGTTAACTCTTTTGTTTACTTGGGATTGGCAGGTGGCAGGTGATGATCAGTGAAGCAGCATATGATATCTAAACTGAGAGTAGTAGTAGAAGAAGAAGAAGCTAGTACAGAGGAGTGTATGTGTTGGAGCTAAAACTGACAAGTACGAGACTACAGCTCCTTGCAAAAGGGGGCTCCTGACCATACATTGCTATAGGCTGGCTCTACACTCTACACACTACTACTGTCTACACATGCAATTATACACACAGAGATGAAATGCATCTTCGTCTCTCCCAGTCCCAGCTACTAGGCCACTTGTGCGAGCTTTGCCTACAAGGATGATCATGGATGCAGAGGCAGAGGCAGAGCACGCAGCAACCACTCCCTGGACCCTGCAGCAGCAGCCTGGGCAAGGCTATGTAGGTAGAAGAATGGAGATATGATGTGTGGTAGATATCTACATACTATATAATAGATATATATGTTTTTTTGGATTTAAGTAAGATACATGGTAGAAGTGTATGCCATGAGTGATTTTCAGGGGACATCGGTGTTGGTCGTTGTTGCTTAAGGAGAATGATGGTGACAAAAAATGTATGTTAGAGATCAGAGTCTTGGAGTTCTATTATAAAGCCCCGTTCGGTAGTGAGCTAGTAGTGGCAATGTTTTCCTTTTAGCATGTTTTCCAAACTGCTAACCGACTGCTAAGATTAGAAGCTTAATCAGTTGCTAAACAATTTGGTATGTGTTTTCTAAGGATTTGAGTTTAAGGACTCTTGTATGGATTTTTATTTGTTGATTTCTTAACTAATGTTGTTGGTTTAACTTAACTAGTTTTAAAAGAGGTATTTTACTGTTCTTAAGGTTGTGCAGTACCAAATGGCAAATCGTGACCGTTGATCTAGCATCATCCAACGGTCAAAAATCGTCCGTACCTCATTGAAGCGGTATCGTGGGTGAGAGGGTACGTCTGTACTTTCACGTGCGGCATCACTTTCTTTCGTGTTTCGCTTTCTTCTCTCTTTCACGATAGGAAAAAAATCGCCGGGGAAGAGCAGTGAGAGAAACTAGCCCTAAATCGCAGGGCTGGGGTGGCGAGAGGCAAGGGCAACGAGAGATGGTGGCGAGAGCACGGGCATGAAGGTCACGAATCCTAGATGGGGACATTCCCGGTGGTAGCCTCGATGCGACTGTAGTGTGGTGACCTCGATGTGCGATGGCGGCGCGGCGCAGACGGCCGGCACGGACGACCTGATGCGGTAGATGGAACAGAGGAGAAGAGAGTGGCACAGAGGATGTCGCTATTGGCTGAGTGGGCAGTGATTAGCAGCGGTATCTCATTTTCGTTAGCCCGATCATACCCCTGCTAAACCAACGGTTATATTATATTGATACCTCGTGTTACATTGTTCCCCGTAGATTCTTAAGGACGGGAAATATGATCGTTTAGAAAACATTGAAACACTTACACTGTAACATAAAACATATGGTTTCGTAAAAGAAAAAAAAAGTATATGCATGCCATTGGGATTGGTGAGATGATAAGGTAGAGGCAGTAAAAAAGAATGGAGACGGCTACGCCGACGCCGTGTACAAGGGAACAGTAGGTCGTGCGAGTGAGAGTGGCCTCCCCGTGGGACGACGTGTCGCCGCCGCATTGCCCCGCGGGACGCCAGCCAGCCACAGCCACAGAGCCGAGCCATACGGCCGCGGCGCGCACGAGAGACTTGTACACCGGCTACGGCGCCGACAACGCTAGCTACTATAGCGCGCGCTCTGGGCTGCCGCGCCGCGCCGGCCGCTCCCAGGACGTGGGCGCGCGCGTGCGCGTGCGCGTCCGTGCGTGCGTGCGTGACGGCGTCTGCGCGCGCGCCGCGCCGATCGATCGATCGTTCGGCTAGCTAGCTGTGGTAGCTGCCCTGCGCACGCACGCCGCGCGCGGGCTATGTATGCACCACCGGCGCAATGCACACCGCCGCGCGCGACCGGCCGGCGCCATACTCTCCCCCGGCGCGCCTCTCGCTTTGTACTCAACTACGACTTGCTTCTGGTGTCTTACTACGTAGGAGTACCTGTTTTCTTTTCTTTCTTTTTTACACAACATTTAACAACCCTAGCTACAACATTTTTTAATTTTCTCTCTTGTTACCATACAAAGCATCAATAATAAGGAATGGAAATGGTGATAGCTAGAAATTCTTGTTCTAAAAAGGAGAAATTATCGGCCAACTGAGCATTGTTTTCATATCGTTTTTGACCTTTTCCATTTCTCCCATATAGCATTTTTGTTTTTCTTTTCCAACGACATTTTGCAGTCGTTAATAAATAGTTAAATTGGTAAATATGAAAAAATTTTGACCGGTCAATAATCATTTTCATAATGTCTCTGACCATTTTTCATGTGTTAAAGATACAGCTATGAGCAGGTTTCAAAAAACGATCGGTTTTCACGAGAACCGCTTGGTTTTCGTGAAACTGCCCACGGTCAATTTAGGGTTACATATCAGTTTTAGGCTAGTTTCCGTAGTACATTGATTGAAAATCCCCGATTTTATCAGTTTTTGGGTAAACCGGTGAGAAGGGTTTTTTTATTTCCAAAACGAAAAGGTAAATCCCGGCCATGAGCGAGTGAAAGGCATGACACACAGGTAGCTAGATAGCAATAGCATAGCAAGCAGCTCGAGTCACTACTCACTAGTAGACGACTACCAGTGTGTCACACACTCACACTAGTCTATATACATATAGCTGTCAAATGTATACATGTGATGGGTATAGCTAGCTCAGCTCTTGACCGACCGGGCATGCAGTCCAAGTGTCGTGCGTGTAGAGGATAAGAAGAGTCGAGATGATGTACACAGTACAGATGGATGGAACGGGGGTAGAAGGATAGGATGATATGTGTAGGAGTAGAGCACTGTTCACGTAAGCACATTGCTGATGATGATGATGATGCATGGTGTGGTCGTAGACGAGAGAGAGAGAGAGAGAGGCTAACTTCACTTGTTCTGCAGAGGAGGCGACGCGTCAGCTGCCTCTGCCAGCGCCCCCCGAAATGGTAACCAAGGATTGTGTTTGGTTTGCTTTGGTTGTGCCTTTTCCACCGGGGAAATGGTAACATCTCCTCATACTTCTCCTCCTCCCCAACTGGCCAAACCAACAAGAAGTATATACACTAGTAGTAGACTACTAGTACTATACTGTACTATTGGAGTAGTACTAGGGCTAGTGCTAGCCGTATAGTATGAGATATTGAGATATGACAACATTTTTTTCTCCTGTGTTTTGGGCCTCTTTGGATCATTGCCCAAAAAAAATGGCATTCAAAAATCGTCACTCATTTGGTTTAGATAAGAAAAATTGGCATTGCCAAATTATTTAGCATCCTTTCTATGCCATTGCATTTGGCTTGGCTAAGATTGGTATCTGCACCAGTACTGTAAAAAAACAATAGTGGTCAAGCTCTATTTTTGTGTTTTTTATAAGTTAGTCTACGATATTTTCTAATATTATGTAATAGTCTAATATTTAAATAAGTATGAACAAAGCATAGGATGGCATTTTACAGCAACAGAGCCCAACTTTTGGGCCTTTTTTTTTGCCAGGATTCGAGACGTACGGCAGTGGCAGTGTGCAATGCAATCGCAGTTCGACACTCAAAAAGGCAAGGATGGCCACAAGCTTGGGAGATCATGCTACTGTAGCACAGCTACAGTAAGACGGCCTACAGGGAGGTATGATGAGTTTTTAAGACAATGTTGACTCCTCGGGAAATAACCAGCCTGTATGCCAGATTCATTCGCCCAATCACTGGATCTCATAATCCCAGGAAAAGACACAACAAGCAGGAATTCTGCAAGCAAAGGTCCAGACAGGTTTTGCCAATCGTTTGAGAGATGGAAGAATATCCAGTTCAGAATAACACCATCATTTCATTTTCCCCCCGACATCTCAAGCTGAATCATCATATCAGCATCATCGTACAACCAAAAGAAAGAAGAATCGTATAGAATACAACGAAATTCGTGTTTGACTGAGTTCAATGCCCCAGGTGAGGAAACAGCAAGCCAGCACCCATAATTCAGTTTTGCAGCACTGGATTTCACAGGTTTTGTATTGTTCACTGTAAATTGTATACAAGTGCTAGTCTTGAGGTCTTGCCTCTCTCGACAAATGTGGCTTCCGGTCATCATGTGACAGGCATGCAGCCCGCAAATGGGATTTCCAGTGTCAAAATGCCAGGAAGAGCAAGTGCTTACAATGCTTACAAGAAATGGGACTCACAAAAAAGTGAAATCAAGAAAAATGACAACAGCAACGCCTTCAGCTCCCTAATACCAGAGAAGTTAAAGAATCATAGGGATTTCAACTTTTTCTTCTTCGATGCTTTTTGGGACTTGGAATCTTTAGCAGCCTGCATCCCAGAATCGTTCATCAGTATTTTCCACCAAGCAAAAATATGTAAAACTAAAAATATTCAAACTATTTTCCACGGTATAGCTATGTGTGGCTGTGCTATTATGAACGGAGTATGTCCATCTGGTAAGCCAAGAAGGCAGTACTTAGACCCTGATTTTTACCAAGTAGACTATGCAATGACAGTAACCCAGAAGCTTAGTCTCCTGATTCTCCTCTTTCTTGTGAAGGAAAACTAGTAAAAGGGTATTACAGTATTATTACCTTTAGATTTTTCTTTTTATTTTTCTTCTTTTTCTTGCTCTGTTCTCCTCCGTTTTGAAAACTCTTATCCTTCTGAGCAATATGATATGACTGTCAGATACATGTCAAAAAACTTTCGGCGTATGGTATATAAAAGCAGCAAAATTGAAACAATTCACAGACATTCTCAAGTGAATGTTCATATACTTGCCTTATTCTTCCTTTTTCTTTTGACCCCCTTGGTTTCTTCTCCATCTTTTGAATCATCAGAATCCTGATAGTCTTGAAATTGTAAGCGCGGAAATCAAATAAACAAATTATATATGAAAGTTATCATCAACATATATACCTCAGAAGAATCTCCGAATGATGAAACGTGCCGTACTATTCTTCCTGAAGTTGAC

>IR65598-112-2-2

TTCTGAACCTGACGTACGCAAGAATCAGCATCAAGTACCTGACGAAATGGTTGCTTGGCTGACACTTGTCCAGTGTGAGCTTTCCGTTGAACTGTCAATTGCTTCCCTCCTTTTTCCCAGCTTTTCTGTACTTGTTGCCCATGTCGTTCAGTTCCTCATCTTCTTCAATTTTCTTCTCCATTTCTCAATCCATTGTCAGTACTACATATGTGTGTACTTCTCGCGGCGCCATTCTTGTCATCTAATTGCAGGTTAGTTGTAAAATGTAAAATCGAATTGGACATTTTGAACCAGGTCATGGATTAATTGATTAAGATGCTAGAAGAAATTAACAAGCTGTGCCATGCAATATATCATGCATGCATGCATGAATATGATGGCTAAGTAGGTACTAATGCTAATATAGAAGAGAGAGAGAGAGAGAGAGAGAGAGAGAGAGAGAGAGATCATCTGCCTAAGTACATATTTGAAGAAGCTCTACTTAATTAACTAGAAATGGCGCCAAGCCACTCTTCTTGTTCGATCTACTGCTAGCTGCTGCTGCTGCTGCTGCTGCTATACTACTCGATCTCTTGCTCGATCGATCAAACGCAGATTGATCAAGATCAACTCGATCTGATCATGGTAGACAGGAAATGATATATGCATGATCGCTCAGAGGCAAAGTGCGTGATTAGCCATGCAATGCCCGGTGCAACTCGATCAATGGGAGAGGAAGCTGAATGGAGAGTAGGAGTCGGAGCCCTGCGACGAGGCGACCATGTCGGCGGCGCCGCCGCTCGCCGGGAACCCGCAGGCGCCGAGCTGGTCCGCCGCGTCGCCGCCGCCCCAGAAGCCGGCGACCATCTGCGCGAGGTCGTCGACGTCCTCCCGGAGCCCCATCATGCCGTAGGCGTCGGCGTCGGAGTAGCGCCGCATGTCCTGATGATCGGCCGCGGCGCCGCCGCCCCTCGGCCGGAGGCAGCTCTCCGGCACCACGCTGCTCAGGTACCCGGAGTTGTCGTCGGCGCCGGAGAAGAGGAAGTCGTGGCCGTTCCTGTCCATGTCCAGCAGCGACGACGACATGCTGGAGCGGTGGGGATCAACCGGGACCATCACCGGCATCGTCGAGCACTCGCCCACCGACGACGCGCCCGACGCCGCGCCATGTCCGTGGTGGTGGTGGTGGTGGTGGTGGTGACCGTACGAGCCAATGTGCGGCGCCGCGCCCACGCCGCCGCCGTACTGCACCGAGGACGGCGCGGCGGCGGCAGCGGCGTACTGCGGCGCGTGGAACGGCGCGAGGAACGGCGGGTAGTTGTAGGCGGCGTGGGTGTAGACGAAGTTGGTGCGCGCCTGGGCGCCCTTCATGGACAGCGCGGCGCGGTCGTACGCCAGCGCCGCCTCCTGCGCCGTGTCGAACGTGCCCAGCCAGTGCCGCTCCTTGGTGGTCGGGTCGCGTATCTCGGCAGCGTACCTCCCCCACGGCCGCCGCCGCACGCCGAGGAACCTCCCTGGCTCCTGCGCGCGCCGCCTGCTGCGCCCCGACGGCGGCCGCTCGCTCATCGGCGACGACGGCGGCGACGGCTGGCTCGCCGGCTTCGGCGGCTCCGAGAACGCCATCAGGCTGGCCTGGCTGCTGCTGCTGCTGCTGCTACTGCCGCTGCCTCGAGTGTTCATGACCAATGCAATATTGCAATATTGCAATGCAATGCAAGAGTGAGAGTGAGAGTGAGCTAGGCTTTAGCTAAGCTAAGGTATATGAATGAGCTCGAGCTAAGCTTAGCTTGTGTGTAGTGCTCAAATGGGAGGGATTCAAGGGTGGTATTTAAATGGGTCTTGGAGAGAGAGGTCACTGTGGATGAGATGGCAGAGAGGGGTGGCATGCATGCACTGCACTTGTGTTAGCTAGACCTATAGCTGCATCATATCAAGGTTAGTTTGTAAGTATTCATCTTGTTTTCCAATGTGAGGTTTGGATTTGTGTGCCCTAATTTAACCTTAGGACCAGTAGAGGGGAATGTTGTGTGCTACTAATGTTTGTGTGTGAGTGTGTTGCTTCAAAATTAAGAATGGTTGGAATGTTCTCCCCTTAGTTTTCATACACTTCATTTATGATGACAATGCATGCTAGCTCTCTACCACACATGTATGCAAAGTTATCATCCTATAGGTATAATATGGGGGTATGGCATACAACATATACAGTCCAACACCAGGCAGCATCTGAAAGTGCCACATTAATCAAGCTAGTGACCAAGAAGCCCCTGCCAAAGCAACTCTTTAAATTTTGCTGGTCCTACATATATTCTAATTGTGGTTTAATTAAGCTAGTTCTAATAATTTCTGCCTTAAGCTTGCATGGAGTCATGATTCACTCCTGAGTTAGACAGTATTACAAACTAATCAGATAATGAAAAGATGCCTGCCACTGGGTTAGGAAAAGGATCAGGGAAAGAAGAGAACATATGTAACCTAGTCATCCACCTTTTTAACAATTGTAATTTGTGTGCTCCAATAAATTTTAAAAAATGAAATCTTTGCTCCAAGATACTACTTCTATAGCTATATATTATGATACATGTCAAAATGCTACTACACACAATAATGCCCATTTTTTACAGGCCATATGGCTTTGCTTTCCTTCGTATCCATGTGCTTGCTTGCGCAATACATGCATGCATGCAAGTTAAAAAGATCAAACAAAAAAAAACCTTAAAGCTATACTTATATTTGCCTCATTGCATAAGCACTTAAGAAGCTTTCAAATGGAGTGGTTAGCTTGCCCTCAAAACTAGATGAACAACAGTGTGAAATGTGTAGAAGGGCACTCTTTCTCATGGCATTCCCTGTGTAATTTTTTTGGTATATTTCTTTTGGTTCCATTCATGCAACCTTGAGTGACACTCACATGAGGTGAGGGTCCAGTGGGTCTCCCCTTCTTTGACTCCTTTTCTCTAGTGAAGCTTTGCTTTGTTCATTTGCATGAGCTAGCTAGACAGATTAATTAAAATAAAATGCTTGTAACGATCATTATCCCTCACAATTCCCATTGAATTCTTGCCGATAATTTAATCACAATGGACATTCTATAGATTAGTGCGCATGTGCGTGCCGGTGTTAGGTTCAAATGAGAACAAATCGAAAGGAGTGATATTAAATCAGCAAAACAAGAGAACTATCCCTTTCATGTCTCTCTAGAGCCATTTTAATAAACCTAATAGATGCCTTTTTGGAGTCAAAAAGAAAGAGAGAGAGCTAGAGCTATAGCCAAACCGGAGAGAGACGAATTGAAGACGTCGTCGAGGTGGTAATGCATCCAATGTATATAGCAACATCAACTCGACCGACTGTTAAGTGTGTGCCATGTGAGGTTTAAGCAAAACAACAACTGAGGTGGATACTACTTTTCACCGGCCACCTGTCTAATTTCTCCTCCACATTAATTAATTAGCTGTTGTGTAATAGCATCTTGTAAAAGGCTTCAAATAGAGAACATCACATAATCTATACTATCTTCGTTTCAAGTTAATTATAAGACATTTTAGCATTGCACACATTCATATAGGTCTTAGAACCTGAAACGGATGAAGTATCAATCTAGTGGATATGCTGATTTTTTTATTTCTTATGAAAAAAATGTTTGCAATTGATTAATTAAGCATATATAATGCAGAGTGAAATTAGCACTGTTAATTCCTCTTGTTTGTTTAACTTTGGAGCATCTAGAAAAGGCTTTTCTTGGAGTGTACAAAGCCTTGACTTCCATCCCTCATGAGAACAATGAGAATTTGGATTCTTATGGAGAGCTGCATTTGGGGCAATTCTTGCATCTAATGCCTTAGCTTCCTACAAATGCAAGTATAGTACAATGAGAGGAGAGCTACATGTGTAGAGTGCATGCAGAGAGAGAGATCTTATCTGATGACCTTGACTTCCCCTACTACACCCCTCTCTTGTGTGTGAATTTGGCATATATGTGTTGGCCTGTGAAAATATTGCATTGCAAGATGGGGTCAGGTCAAGCCCTAGCTAGACATCTGAAAAGGTGTGAGGAGGAGAAGGTGGTGTTCAACTGGAGATGGGGAGAAAAAAGGAGAAATCTAAGGGCAAGGAGGCTCCACACAATGGCCTTGACAAGATGTACTAGAAATGCATAAGTTAGTTAATTTGCAGAGAGACCAGATTAAACTGATAATTATAATTATGATGGAAACGAGCACAGCACACAAGACACATGTTCTTGTCTATTCCTTAGGGTCACACCCGGGTTTTGGGGGTGGCCTTTGCACTACTTTGACTTTAGACCTCCCTTATAGAACCAACAAGTTTTGTGGAAAAGACACACACCCCAAAAAAATAATATGTATGCTAGGACAGTGTGGGTGTGGGTGTTTGTGTGTGTGTGTGTGTATGTGCAATTGTAGAAGTATGCAAGGCAGTTCACTAAACATAATCAAGGGAAAGGTAGAAAAAGACCACTTGGGGCATGCACATTTGTCTCACCAAGTTGTGGTTTGAATAAAAGGAGATCAGACAGAGTTTAGTAGTGAAAAGGTGCACTCACAATTCACAGAACAAAAGCTCCACATAGAACGCTTACTTTAATCATTTCGAATTTGAACTCTGATTTTCAATTGTTGATTCTATGCTAATTCCAAAAAACTTCCATATATTAGATATTTTGGTGGATATCATTCCAATTGTATTGGTACCTTAACAATTGTCAGTGCTTGCTACGAAAACTCTGTTTCTAGTTTTCAGATAATTGATGGCAATTAATTAGTACTGCATCAAGTTCAAATCTTCAGCTCGCAGATTGGACAAGGTTATTGTACTGGTCAAACAGTTCGATCTCACAGTGTTAGTGTTGCTGTTGTCTATGTGATTGATTACTAAGTTATTAATTAAACAAGCGACCAAGTACCAAGAGGAGAGTGCACTACAGCACACTTGTCCCATTTTATATCGACCACCAAAAATGACAAGCAATTACGCAACTGAAGATGATGATTTGGCACTGATCTAACGAATGAAAGATTGTTCCCACTCTTCAAGTTCCTATGATCCATGTTGATTGGTCTGATCATCCCCAATGGCATTGTCCTGCATTTGACTGAACAATGATTAACATAAGCATGCATGGTTTCTTGTTGTTAACTCTTTTGTTTACTTGGGATTGGCAGGTGGCAGGTGATGATCAGTGAAGCAGCATATGATATCTAAACTGAGAGTAGTAGTAGAAGAAGAAGAAGCTAGTACAGAGGAGTGTATGTGTTGGAGCTAAAACTGACAAGTACGAGACTACAGCTCCTTGCAAAAGGGGGCTCCTGACCATACATTGCTATAGGCTGGCTCTACACTCTACACACTACTACTGTCTACACATGCAATTATACACACAGAGATGAAATGCATCTTCGTCTCTCCCAGTCCCAGCTACTAGGCCACTTGTGCGAGCTTTGCCTACAAGGATGATCATGGATGCAGAGGCAGAGGCAGAGCACGCAGCAACCACTCCCTGGACCCTGCAGCAGCAGCCTGGGCAAGGCTATGTAGGTAGAAGAATGGAGATATGATGTGTGGTAGATATCTACATACTATATAATAGATATATATGTTTTTTTGGATTTAAGTAAGATACATGGTAGAAGTGTATGCCATGAGTGATTTTCAGGGGACATCGGTGTTGGTCGTTGTTGCTTAAGGAGAATGATGGTGACAAAAAATGTATGTTAGAGATCAAAGTCTTGGAGTTCTATTATAAAGCCCCGTTCGGTAGTGAGCTAGTAGTGGCAATGTTTTCCTTTTAGCATGTTTTCCAAACTGCTAACCGACTGCTAAGATTAGAAGCTTAATCAGTTGCTAAACAATTTGGTATGTGTTTTCTAAGGATTTGAGTTTAAGGACTCTTGTATGGATTTTTATTTGTTGATTTCTTAACTAATGTTGTTGGTTTAACTTAACTAGTTTTAAAAGAGGTATTTTACTGTTCTTAAGGTTGTGCAGTACCAAATGGCAAATCGTGACCGTTGATCTAGCATCATCCAACGGTCAAAAATCGTCCGTACCTCATTGAAGCGGTATCGTGGGTGAGAGGGTACGTCTGTACTTTCACGTGCGGCATCACTTTCTTTCGTGTTTCGCTTTCTTCTCTCTTTCACGATAGGAAAAAAATCGCCGGGGAAGAGCAGTGAGAGAAACTAGCCCTAAATCGCAGGGCTGGGGTGGCGAGAGGCAAGGGCAACGAGAGATGGTGGCGAGAGCACGGGCATGAAGGTCACGAATCCTAGATGGGGACATTCCCGGTGGTAGCCTCGATGCGACTGTAGTGTGGTGACCTCGATGTGCGATGGCGGCGCGGCGCAGACGGCCGGCACGGACGACCTGATGCGGTAGATGGAACAGAGGAGAAGAGAGTGGCACAGAGGATGTCGCTATTGGCTGAGTGGGCAGTGATTAGCAGCGGTATCTCATTTTCGTTAGCCCGATCATACCCCTGCTAAACCAACGGTTATATTATATTGATACCTCGTGTTACATTGTTCCCCGTAGATTCTTAAGGACGGGAAATATGATCGTTTAGAAAACATTGAAACACTTACACTGTAACATAAAACATATGGTTTCGTAAAAGAAAAAAAAAGTATATGCATGCCATTGGGATTGGTGAGATGATAAGGTAGAGGCAGTAAAAAAGAATGGAGACGGCTACGCCGACGCCGTGTACAAGGGAACAGTAGGTCGTGCGAGTGAGAGTGGCCTCCCCGTGGGACGACGTGTCGCCGCCGCATTGCCCCGCGGGACGCCAGCCAGCCACAGCCACAGAGCCGAGCCATACGGCCGCGGCGCGCACGAGAGACTTGTACACCGGCTACGGCGCCGACAACGCTAGCTACTATAGCGCGCGCTCTGGGCTGCCGCGCCGCGCCGGCCGCTCCCAGGACGTGGGCGCGCGCGTGCGCGTGCGCGTCCGTGCGTGCGTGCGTGACGGCGTCTGCGCGCGCGCCGCGCCGATCGATCGATCGTTCGGCTAGCTAGCTGTGGTAGCTGCCCTGCGCACGCACGCCGCGCGCGGGCTATGTATGCACCACCGGCGCAATGCACACCGCCGCGCGCGACCGGCCGGCGCCATACTCTCCCCCGGCGCGCCTCTCGCTTTGTACTCAACTACGACTTGCTTCTGGTGTCTTACTACGTAGGAGTACCTGTTTTCTTTTCTTTCTTTTTTACACAACATTTAACAACCCTAGCTACAACATTTTTTAATTTTCTCTCTTGTTACCATACAAAGCATCAATAATAAGGAATGGAAATGGTGATAGCTAGAAATTCTTGTTCTAAAAAGGAGAAATTATCGGCCAACTGAGCATTGTTTTCATATCGTTTTTGACCTTTTCCATTTCTCCCATATAGCATTTTTGTTTTTCTTTTCCAACGACATTTTGCAGTCGTTAATAAATAGTTAAATTGGTAAATATGAAAAAATTTTGACCGGTCAATAATCATTTTCATAATGTCTCTGACCATTTTTCATGTGTTAAAGATACAGCTATGAGCAGGTTTCAAAAAACGATCGGTTTTCACGAGAACCGCTTGGTTTTCGTGAAACTGCCCACGGTCAATTTAGGGTTACATATCAGTTTTAGGCTAGTTTCCGTAGTACATTGATTGAAAATCCCCGATTTTATCAGTTTTTGGGTAAACCGGTGAGAAGGGTTTTTTTATTTCCAAAACGAAAAGGTAAATCCCGGCCATGAGCGAGTGAAAGGCATGACACACACTACCAGGAAACAGACTTTCCCTCACGGCCTAAAACCGTCAGTATTAAGGATTTTCCGTCAGGAGTACTCTTCTCTGACGGGTAGCCGTCAGGACTGTACCGACAGGGGTAGACTGTCAGGAAAAGGTCATCTTTCGCGTCGGTCGCCTGTCACGGCTGTGATCCTGACGGCCCTTCGTGAATCCTGACGGTTAGTCCTGTCGGCTGTTCTGCCGTGCGAGGAGGGAATGCTCGGGTCGTCATACCGTCAAGGTTAGCCGTCAGGGATAAGTCCTGACGGTCTGCACCGACAGGACAGGAAAAAATAAACCCTGACGTGTCCACGTTCAGGACATCAAGGCAAGCCTAATTGGCTGGCACGAATATTAGATAAATTGTTACATTATGGATGTTACAGAATGCTATATATCAAAACTCAAATTTCACGTAACAACTCATACATTGCCATCCACACATAGACAACATTGATAATCTGTAGCACATCAGATATGCAAGTTTCATACATATATGGTCAAAGTATCATGTTACCAGACCAAACTAAGTTCATTACAAAGTTCCTAGTAAATAGAGTCTGCTCAAGCAAATTCACTAATTCAACCTTCAAGGAAATGCTCAAGCTGCTTGCTAGACTAGAAGATGCAACAAGCTAATTCCTATACCAGTGACAAGTGGAGCAAAACCAAAAAACAAATGCTCCAGCACTTCATCCATCCTTCATCTAACTAGAAGTTATAGCTTAAGTGATTAGGCAGTACCACATGCGAGCTTAACAAAAAACAAAAAGCTCCAGCATATCATCTATCCATCATCTGACTAGAAGTGTAGAAGCTAAACAAACCAAAAGGCTTTAACACATGTGCGAGCTAAACAAAGAAGATGCTCAAGCACATTCCTCAACAATGTTCTCAGGTTGGATGTTCTCGTCATGCTGGGCATTCTCCTCATGTTGTATGTTATTCTCAGATTGTAATGCACCAGCATCAGTTCCAGCTTGTGATAATCCAGTTCCCTACAATAATATAGACAACTAAGTTAAGTATCATGGGTACACATGGCAAATAAGTTAAGTATAGCGGTACTCTGATTTCCTAGTTATACAGATTTACATCCTTTCTACATGCCTAATTAGAGTATCCATGAAGGACATGCAACTTCCACTTAGTTAGATATACATGCTTGCTACATGCCTAATTAACTGTTATAAATCTTTCCAATCAAGTAGGTAGTAGCACTGAAGGTATTAAATCTTAAAACCAATATCACAAAGTACACAAAGTCCCACACCTGATCACTAGACATCACACTTGTGTTCGCATGATAGGCTTCAATTTGAACAACATCAGAGGGTACTTCCATCCCAAGCTTATCATAGACAGCCTGCAATTTTAAAATGTCAAGGTCATGAGTTTGAGGTAATAATGAAACTTGTTCAGAAATATGATGAAGGTCAGTACCCGAAGATGCTTGCACAAAACAGACGAATGATGGCTGCTCTGCTCCAACTGTGCATTTCTTGCAAGAAGTTGATTATATGACATGGATTTTGACGGCCGTACATTTTGTGCTCTTGCAGTCGCTTTCATTGTAGCCTTCTTTACAGCACCATTTGCTATTGGCACACGGCCATGAGGCATACCACCTCCAGATTTATACAAGACATGGACATCCAATGTGTTCTTACGCTGTTCAAAATCATTTGGGTATTCAGCTTCGAGACATTGAAAGTAATTATCCTGGAAAATAAAGATAGAAAAAAGTATGTTACTTTCCATAAGATATAATTAGAAAAATTGAAAATAAGAGTGCAGTTACATACAACACGCTGCTGTCCCTTACGACATGGGATTGGACCGCTATTTCCATTGGCATCACAATTTTTTACCCCTGCCTTCATTGCACAATTAGTATTCAGCTCTGTGGCAGCATCATCACCAAATCTCTTTTTCTTAATTGCATTTATACCACAAGTGAGAAAACAAAGAAGGTTATTAGAATAGTTCACATTTTTCTGTCAAACACATGTCAAGGCATGAATATAATGTCTACGCAAGCACTCGTCTACATTTGCCATAAAACTAGAAATCTACTGATCAACATATATTATGTGCCCCAATATAAATCATGTAATTTCAGTATCAATTCACTAAATATTTTGTGGCATCAATTCACACAATAATTATAATAAGTGCATTTGATCAAGTACTGAACACATACTAAGGCAACAGTTATATTCAACATACTAACCATAAACTTTTGGGTCTGCGTGAATGATTATGATCCACCCCTATTTTGAGCAATGTCATCGGATTTCAGCCTTGATTCCTGTCCAAGCTTGCGTTTCTTCTTGAATTCAGCAGAACACCAATAGGAACAGAGTGAAGCCCACGGAGCTGTGTCGATCCAATCAAGCTTGGCTTTCACATATTGGGCTTCACGAAGCTCTTTCTTTCTTGCTACTTCATCTCGGATGGGATTGTTAAGAAATTGGTCATAATACTTCTTTACAGCATCCACACGAGCTTGGTACATAATATTCCTGAATTGTTTAGCCAGACAATTCTCAAGAACACGTTCAGCTTCATCTCTTTCTTCTTCATGAACCGAATATATGCTCTATGGAAATATAATCAAAAGTAAGTCTTGTTGCTTATGAATTCTAAAATTGCTAGTACTAGCTAAGTAGCGAAAGTTCATTAATGCTGGATTCAAGGTACATAGAAAAGTTAGTTCATTACCCAAAACTCGTCTTTGACAGTGTCTGCACAAGTTTCACCCAACTCATCTTTAATCAAATAATAATCCAGCCACTTGGATGCATGTCGTTTCTTTATAACCTTGCCAGCTCGATTCTTTGTCTCAATGATAGGTGGGTACTGAAGTTTGAGGATAGCTGTAATTTGACCACCTAATGTCTTGGCGCCCTCGGGTGGATCATTTATGAATTCAAATTGCCTATTTTGAACAAAAATCTTAGACATGGTCATTGAATAGAACAAAATTAAGTTAGACTTGTTGGTTTCATTTACTTACTCGTCACCATTAGGTCTAATGGGAATTTCTTGACCATTTGGCGGCCTTTTTAGCTTGGTTCGCCCTCTCTTTCTTCTTTTCTCAATAAGGTCATCTTCAATCTCAACATCATCTGAATTTTCTTCCTCAATATTCTGTTGAGAGGCCTCCCTTCCTGGCCGATGACTAAAGCTCCTCTTGGCGCTCTGCACATGATAGAAAAAAAACAGTTAGAATTGGTAAAAATAAAGATTATTGAACTTATATTTGTGTATGACTCAGCCACTCAGGTTTAGATTACAAAACAAAACCATGCAAGCGTACTCATGGGGGCCAAAATGACATAACATATTACAATAAAGCTTAGAAGTTCAGATTACACACATAAATAGAAACAAAAAAGGCAAAACCAAATAATTTCATAAAAAATCAGAAATCTTCTGCTTCATAGTCAAGAAGTTCTTCCCCATCATCAGAACTTTCACTGTGCACCTCGTCCTCATCTGAATCTTCATCACAACTAATCTCATTCTCCAACCTCTTGAGATCTTTTGGATTAGTTATCTCATTGGATCCTACTGTTGCAGAATTCTCCAAGTCACTTCCTAGGTCTATCACAAATGTGCCATCCAACCCGTCTTCTTGAAAGAATGACATGTCTTCTACTGGGTTGTGATGATTATTGGCCATAGTGCTAGTATCAATGTGAAGCAACCGGTTCTTGGGTGCAACTTGGTAAACAACCCACCATTCAGATAAATCTGGTCTGGTTGTACAAGGGTAAGGTACGTAGTACACCTGTGTGACTTGACTAGATAGAACAAATGGATCAAAATTAGATAGCCTTGAGGTATGCTTAACCTCCACCAAGCCCAAATTTTCTGTTCTCCTAACACCAGCAGAGGTTGGGTCAAACCAAGTACATTCAAAAATAACAAGCTCAAGTTGCATGCTGCCATCCCATGAAACTTTGATAATGTCTTCAATTACCCCGAAATACTCTATAAGATCATTATTTCCATCATAACTTGACACACAAACACCAGAATTGGTTATAGTTAACCCCGACCTACTTCTCTCATACTTCATAGACCGAAATCGATACCCATTAACATCATAACATCCATATGTATCCACCCTTCTGCAGAATCCATAAGAAATTTGGCACAAAGCATTGTGAACACTTGAAGTGACCTTACACTGCAGATTTAGTTACATGTTAGTGATTGTTTATAGTGATGTGAGAGAAGATTAAAAGAAATCAGTATTCCAAGTCATTACTAGAGATTTGAACCAATCAAAGAAGTTAGGTCCATTGTCGATGCCATGCCGTCCTTTCCAACCATTTAATCTAAGGTCGATAATTTGATGCTCGTTTGGTGCTGCTATACCTTTCCATTGTTCTTGGTCAAATTTGCTACAAGAAATTGTTACTTCTGAAATTTCAAGTTTGTAAAGAAAAACAACAATCAAGGAATGTGAACTGAACACATACTCAAAGAAGACATCCATCTCGGATAGATTAGTCAATATATACATAAATGCTGCATTGTATTCTTCTTCTGTAAGATCCCGATATCCTCTTGAACTCATGCATCGACAAGGGTGTTGGAACATTTCAAGGTCACAAGCAGCCCGAAATGTTAGCATATCATCATCGTATCTAGGAGGTTGATTTCTAATAGAGTGCACACCGTTTTTGAAATACATTGCAAGAAAATTTGTGGTCTCTTCTACAAGGTAAGCTTCAGCAATAGAACCCTCAACTCGAGCCCTATTACGAACTTTCTTCCTAAGCCTTTGGATGTTCCTAAACAAAAAGTGACATAAATTAAGATTGGCATTAATTTATTATAAATTATGTTTAAGATGTTTAAGTATACCTCTCAAATGGATACATCCATCGATAATGGACAGGACCTCCTAAACGAGCTTCATATGGAAGGTGCATTATTAGGTGCTGCATTGGGTTGAAGAAACCTGGGGGGAATATCTTCTCAAGTTTGCAAATAATGACCAGACTATTCTTTTCCATAGCTAATAAAGTTTCTTTGTTGAGTTGTTTTGCACATAGCTGTCTATAGAAATAACTCAACTCAGCTAGACAAACCCAGATATTTTCAGGTAGAAAACCACGGAAAGCAACAGGCAGCAGACGCTCCATGAAAATATGGTAGTCATGACTTTTTAGCCCAAAAATCTTCTTTTGCAATAGATTAACACCCCGCCTAATATTGGAAGCATATCCATCTGGAAACTTCAGCTCTTTGAACCAATTCAAAATGGTTATCTTATCTTTCCTATCAATGCAGAAGGCTGCTCTAGGCTATGCCATTTACCATTTACCTTCAATTCAAGATGAAGTGATGGTCGATCACAAATGAATGCTAGGTCTTGCCTCGCCTTTACATTATCTTTGGTTTTATCAACAATGTCAAAACAAGTGTTCCATATTGCTTCCGCTACATTTTTCTCATTGTGCATTACATCAATATTGTGTCGAAGTCGCAATTTGTTGAAGTAAGGTAACTGCCAAAAACAACTTATGTGAGTCCAATTGTGTTGTTTCCCATAGCTTTTACTGTCACCTACTTGACTATACATTTGTGCTTCTATTTCTTCATCTGTCAATTCCCTTGGTGGTTCATCTAGTACTATGGTATTTTTCCTAAAAGCATTTGCTTGTGTTCTGAATCATGGCCTATTGGAAGAAAGCGCCTATGACAATCAAACCAACTTGCCTTGCCACCATGACGTAGCTTAAATGCATGAGTATCACCCAAACACCGTGGACATGCCAATGTACCATGGGTGCTCCACGCAGCAAACATTCCTAGTGCAGGAAAATCATGTATGGACCATAGACATGCAGCCCTCATTACGAAGTTACGTTTCAATGAAGAATCCCATGTTTCAACACCCTCCCACAAATTGGATAATTCATCAACCACTGGTTGCATGAAGACATTGAAATTTTTACCAGGATGTTTAGGACCAGGGATAACTAGAGCAAGAAAAGTGTACTCAGGTCTCATACAATAGCCTGGTGGAAGATTGTAAGGAATCACAAACACAGGCCAGCATGAATAAGGAGCAGCCCCTAGACTATAAGGTGTGAAACCATCAGTTGCTAATCCCAGTCTAACATTCCTTGGATCTTGTGCAAAGGTTGGAAAATCTAGATCAAATTGTTGCCATGCCTCACCATTACGTGGGTGCACCATTTTACTAGAATCAGAGGAAGAGCATTCTTTATGCCACTTCATCAATTTTGCTATCTCCTCATGTGCATACAATCTCTGTAATCTGTCTTTTATTGGCATGTATCTCACTACTTTACGTGGAACCTTATTTGAACCATTCTCATAACGAGGGGTGTTACAGAAGTCACACTTTTCTTTATCTATATTCTCTTTATAATAAAGCATGCAGTTATTGTAGCAAACATCGATTTTCTGATATGGCATACCAAGACCCTCTAAAACTTTTTTGGAACGATAGAAGTCTGATGGCAAGTTAGACTCACTAGGTAGAAGCTCACGGATAAGTGCTAAAATGTCATCATAGCAAGCAACTGAGAGATTGTATTGTGAGTTTATAGATAGCAACCGGGCTATAGCAGAAAGAGTTGAGTGTGTTGTTTTATCATGCACTTGCTGGTCTGCAGTAGCAACCATCCTATAAAATGCTTGTGCAGAAGGTACTGGTTCATCATCGATTTCAGGAGTGTTGCAATCAGCTAAGTCCGCTAACATGTCACCCATTCGATCAGATTCGTCCAACCCTTCATTATCTACATGAGGTTGAGCTTCTTGATTATGTTCAAAATGCCTCTCACCATGTGCTGTCCAAGTTCTATAATTTTCTTTGAAACCATTTCTACACAAATGCAATTCAACCTTGCCCCTCTTGTGCCAAAAGTAATTTCGACACATAGAGCAAGGACACTTAATGGTACCTTCTCGTACTACACTAGGTTTAGAGAAGGCAAGATCCAAGAATTCCTTCGTGTGCTCAACCCACTCATTTGAGGGTCTACCACGCTTCCAACCCGTATACATCCACTCGCGTTCAGGTATTGATGAATTCTGTTATACCAATTTAGGACAAAGGTACGAATTAGCAGCTACGTAAAGCAAAATATTGAAATTATCCCTAAGACATGCACACAAAAATATGCACACTGCTGTGATACTCCAAACTCATTATGCAACTACATTAAAAAAAAAAGAAACATGTCCTTCACTTGTAACAATTCTCATGTATGATTTATTGACCAAATGATCATCCCAACAAATCATATAAGCACAACTGTATGAATTAAATAAATGCACAAAAGTCAACTCACCATTGTAGCTAGTAGATTGAAGATCAACGAAAGCAGGCAGTACTGATACGCCTTCACTATTGGTTCTTTTGTTCTCCTATCAGAGAAGAGGCTGCAAGAAAAACATGGAATGAATATATTTTTCTGAAGCAAATAAACCAATTCCTAGAATGTAAAATTTACAAAAGTTGCATATCATAAATAAATAATTGATACAAATTAGGTACCAAAACATGCAATGTCGGCACTCTAAATGACTGTATTAACTAAGTAAGCTGACAATAAAGATATTAAAAAACTAAATTAAGTAATGATGTGTTAATAATCAACTAACATGGGGGATTGGGGGCAATAGATGGTGGATTGGGGGGGGGGGAGGCGAAGGCCGGCGGGGGCATTGGATTTAGGGACGGCGAAGGAGGGATGAGAGGTCGGCTAAGGAGCGGGAGCTGTGGATACGGCGGAGGAGGCAAAAGGGATAGTGGCTAGGATGAGGAAGAGAGGAGAACCTGAAGCTGCTCGATCGTCGGTGGCGCTTGAACACCTGCAACGTGGTCGGCGACGCGAGGGTCGATGTGCGGGGCGGTTGCCGCGGCGCTCGAACGGACACGACGGCGGCCGGGCGGCGCTGCGAGGACCACGGCTGTCGACGGCGGCCGGGCAGCGCTGCGAGGACCACGGCCGTCGACGAGGGGGTGGTGGCCGGTGGCGCTCGAGGGGTCCCGCCGGTGGAGGCTGGCGGAGCTCAAGGGTCGCGCGAGCCCTCGAGTAGGCGGCGCTCGTGGTGAATGGTCAATGGGCACAACAGGTTCGATACCTTATCCTTATCCATGTGATTTTACATTTTGGTCCCTTCGCTCCTGGCGCACGCGGGAGAACTCCCGCCAACGAACTTTTTCCCGGAACTGGATGGCGCCAACTTTGCTTTTCGTTCGCGCGTACTCCGTTTTTCTTGTCCCCACTGCAATGTGCCTGACGGGTTCGTGGCTCCGAGAGGATAGCGTGACTTTTTCGTGTCGTGAGTTTGCTTCCGTGAGGGTACGTCAATGTTTTCTGACGCACAGTTCAAGGCCGCCAGAATCAACTTCTGCCGTCAGGGGATGATGGTTTTCTGGTAGTGACACAGGTAGCTAGATAGCAATAGCATAGCAAGCAGCTCGAGTCACTACTCACTAGTAGACGACTACCAGTGTGTCACACACTCACACTAGTCTATATACATATAGCTGTCAAATGTATACATGTGATGGGTATAGCTAGCTCAGCTCTTGACCGACCGGGCATGCAGTCCAAGTGTCGTGCGTGTAGAGGATAAGAAGAGTCGAGATGATGTACACAGTACAGATGGATGGAACGGGGGTAGAAGGATAGGATGATATGTGTAGGAGTAGAGCACTGTTCACGCAAGCACATTGCTGATGATGATGATGATGCATGGTGTGGTCGTAGACGAGAGAGAGAGAGAGAGAGGCTAACTTCACTTGTTCTGCAGAGGAGGCGACGCGTCAGCTGCCTCTGCCAGCGCCCCCCGAAATGGTAACCAAGGATTGTGTTTGGTTTGCTTTGGTTGTGCCTTTTCCACCGGGGAAATGGTAACATCTCCTCATACTTCTCCTCCTCCCCAACTGGCCAAACCAACAAGAAGTATATACACTAGTAGTAGACTACTAGTACTATACTGTACTATTGGAGTAGTACTAGGGCTAGTGCTAGCCGTATAGTATGAGATATTGAGATATGACAACATTTTTTTCTCCTGTGTTTTGGGCCTCTTTGGATCATTGCCCAAAAAAAATGGCATTCAAAAATCGTCACTCATTTGGTTTAGATAAGAAAAATTGGCATTGCCAAATTATTTAGCATCCTTTCTATGCCATTGCATTTGGCTTGGCTAAGATTGGTATCTGCACCAGTACTGTAAAAAAACAATAGTGGTCAAGCTCTATTTTTGTGTTTTTTATAAGTTAGTCTACGATATTTTCTAATATTATGTAATAGTCTAATATTTAAATAAGTATGAACAAAGCATAGGATGGCATTTTACAGCAACAGAGCCCAACTTTTGGGCCTTTTTTTTTGCCAGGATTCGAGACGTACGGCAGTGGCAGTGTGCAATGCAATCGCAGTTCGACACTCAAAAAGGCAAGGATGGCCACAAGCTTGGGAGATCATGCTACTGTAGCACAGCTACAGTAAGACGGCCTACAGGGAGGTATGATGAGTTTTTAAGACAATGTTGACTCCTCGGGAAATAACCAGCCTGTATGCCAGATTCATTCGCCCAATCACTGGATCTCATAATCCCAGGAAAAGACACAACAAGCAGGAATTCTGCAAGCAAAGGTCCAGACAGGTTTTGCCAATCGTTTGAGAGATGGAAGAATATCCAGTTCAGAATAACACCATCATTTCATTTTCCCCCCGACATCTCAAGCTGAATCATCATATCAGCATCATCGTACAACCAAAAGAAAGAAGAATCGTATAGAATACAACGAAATTCGTGTTTGACTGAGTTCAATGCCCCAGGTGAGGAAACAGCAAGCCAGCACCCATAATTCAGTTTTGCAGCACTGGATTTCACAGGTTTTGTATTGTTCACTGTAAATTGTATACAAGTGCTAGTCTTGAGGTCTTGCCTCTCTCGACAAATGTGGCTTCCGGTCATCATGTGACAGGCATGCAGCCCGCAAATGGGATTTCCAGTGTCAAAATGCCAGGAAGAGCAAGTGCTTACAATGCTTACAAGAAATGGGACTCACAAAAAAGTGAAATCAAGAAAAATGACAACAGCAACGCCTTCAGCTCCCTAATACCAGAGAAGTTAAAGAATCATAGGGATTTCAACTTTTTCTTCTTCGATGCTTTTTGGGACTTGGAATCTTTAGCAGCCTGCATCCCAGAATCGTTCATCAGTATTTTCCACCAAGCAAAAATATGTAAAACTAAAAATATTCAAACTATTTTCCACGGTATAGCTATGTGTGGCTGTGCTATTATGAACGGAGTATGTCCATCTGGTAAGCCAAGAAGGCAGTACTTAGACCCTGATTTTTACCAAGTAGACTATGCAATGACAGTAACCCAGAAGCTTAGTCTCCTGATTCTCCTCTTTCTTGTGAAGGAAAACTAGTAAAAGGGTATTACAGTATTATTACCTTTAGATTTTTCTTTTTATTTTTCTTCTTTTTCTTGCTCTGTTCTCCTTCGTTTTGAAAACTCTTATCCTTCTGAGCAATATGATATGACTGTCAGATACATGTCAAAAAACTTTCGGCGTATGGTATATAAAAGCAGCAAAATTGAAACAATTCACAGACATTCTCAAGTGAATGTTCATATACTTGCCTTATTCTTCCTTTTTCTTTTGACCCCCTTGGTTTCTTCTCCATCTTTTGAATCATCAGAATCCTGATAGTCTTGAAATTGTAAGCGCGGAAATCAAATAAACAAATTATATATGAAAGTTATCATCAACATATATACCTCAGAAGAATCTCCGAATGATGAAACGTGCCGTACTATTCTTCCTGAAGTTGAC

>IR76904-7-19

TTCTGAACCTGACGTACGCAAGAATCAGCATCAAGTACCTGACGAAATGGTTGCTTGGCTGACACTTGTCCAGTGTGAGCTTTCCGTTGAACTGTCAATTGCTTCCCTCCTTTTTCCCAGCTTTTCTGTACTTGTTGCCCATGTCGTTCAGTTCCTCATCTTCTTCAATTTTCTTCTCCATTTCTCAATCCATTGTCAGTACTACATATGTGTGTACTTCTCGCGGCGCCATTCTTGTCATCTAATTGCAGGTTAGTTGTAAAATGTAAAATCGAATTGGACATTTTGAACCAGGTCATGGATTAATTGATTAAGATGCTAGAAGAAATTAACAAGCTGTGCCATGCAATATATCATGCATGCATGCATGAATATGATGGCTAAGTAGGTACTAATGCTAATATAGAAGAGAGAGAGAGAGAGAGAGAGAGAGAGAGAGAGAGAGATCATCTGCCTAAGTACATATTTGAAGAAGCTCTACTTAATTAACTAGAAATGGCGCCAAGCCACTCTTCTTGTTCGATCTACTGCTAGCTGCTGCTGCTGCTGCTGCTGCTATACTACTCGATCTCTTGCTCGATCGATCAAACGCAGATTGATCAAGATCAACTCGATCTGATCATGGTAGACAGGAAATGATATATGCATGATCGCTCAGAGGCAAAGTGCGTGATTAGCCATGCAATGCCCGGTGCAACTCGATCAATGGGAGAGGAAGCTGAATGGAGAGTAGGAGTCGGAGCCCTGCGACGAGGCGACCATGTCGGCGGCGCCGCCGCTCGCCGGGAACCCGCAGGCGCCGAGCTGGTCCGCCGCGTCGCCGCCGCCCCAGAAGCCGGCGACCATCTGCGCGAGGTCGTCGACGTCCTCCCGGAGCCCCATCATGCCGTAGGCGTCGGCGTCGGAGTAGCGCCGCATGTCCTGATGATCGGCCGCGGCGCCGCCGCCCCTCGGCCGGAGGCAGCTCTCCGGCACCACGCTGCTCAGGTACCCGGAGTTGTCGTCGGCGCCGGAGAAGAGGAAGTCGTGGCCGTTCCTGTCCATGTCCAGCAGCGACGACGACATGCTGGAGCGGTGGGGATCAACCGGGACCATCACCGGCATCGTCGAGCACTCGCCCACCGACGACGCGCCCGACGCCGCGCCATGTCCGTGGTGGTGGTGGTGGTGGTGGTGGTGACCGTACGAGCCAATGTGCGGCGCCGCGCCCACGCCGCCGCCGTACTGCACCGAGGACGGCGCGGCGGCGGCAGCGGCGTACTGCGGCGCGTGGAACGGCGCGAGGAACGGCGGGTAGTTGTAGGCGGCGTGGGTGTAGACGAAGTTGGTGCGCGCCTGGGCGCCCTTCATGGACAGCGCGGCGCGGTCGTACGCCAGCGCCGCCTCCTGCGCCGTGTCGAACGTGCCCAGCCAGTGCCGCTCCTTGGTGGTCGGGTCGCGTATCTCGGCAGCGTACCTCCCCCACGGCCGCCGCCGCACGCCGAGGAACCTCCCTGGCTCCTGCGCGCGCCGCCTGCTGCGCCCCGACGGCGGCCGCTCGCTCATCGGCGACGACGGCGGCGACGGCTGGCTCGCCGGCTTCGGCGGCTCCGAGAACGCCATCAGGCTGGCCTGGCTGCTGCTGCTGCTGCTGCTACTGCCGCTGCCTCGAGTGTTCATGACCAATGCAATATTGCAATATTGCAATGCAATGCAAGAGTGAGAGTGAGAGTGAGCTAGGCTTTAGCTAAGCTAAGGTATATGAATGAGCTCGAGCTAAGCTTAGCTTGTGTGTAGTGCTCAAATGGGAGGGATTCAAGGGTGGTATTTAAATGGGTCTTGGAGAGAGAGGTCACTGTGGATGAGATGGCAGAGAGGGGTGGCATGCATGCACTGCACTTGTGTTAGCTAGACCTATAGCTGCATCATATCAAGGTTAGTTTGTAAGTATTCATCTTGTTTTCCAATGTGAGGTTTGGATTTGTGTGCCCTAATTTAACCTTAGGACCAGTAGAGGGGAATGTTGTGTGCTACTAATGTTTGTGTGTGAGTGTGTTGCTTCAAAATTAAGAATGGTTGGAATGTTCTCCCCTTAGTTTTCATACACTTCATTTATGATGACAATGCATGCTAGCTCTCTACCACACATGTATGCAAAGTTATCATCCTATAGGTATAATATGGGGGTATGGCATACAACATATACAGTCCAACACCAGGCAGCATCTGAAAGTGCCACATTAATCAAGCTAGTGACCAAGAAGCCCCTGCCAAAGCAACTCTTTAAATTTTGCTGGTCCTACATATATTCTAATTGTGGTTTAATTAAGCTAGTTCTAATAATTTCTGCCTTAAGCTTGCATGGAGTCATGATTCACTCCTGAGTTAGACAGTATTACAAACTAATCAGATAATGAAAAGATGCCTGCCACTGGGTTAGGAAAAGGATCAGGGAAAGAAGAGAACATATGTAACCTAGTCATCCACCTTTTTAACAATTGTAATTTGTGTGCTCCAATAAATTTTAAAAAATGAAATCTTTGCTCCAAGATACTACTTCTATAGCTATATATTATGATACATGTCAAAATGCTACTACACACAATAATGCCCATTTTTTACAGGCCATATGGCTTTGCTTTCCTTCGTATCCATGTGCTTGCTTGCGCAATACATGCATGCATGCAAGTTAAAAAGATCAAACAAAAAAAAACCTTAAAGCTATACTTATATTTGCCTCATTGCATAAGCACTTAAGAAGCTTTCAAATGGAGTGGTTAGCTTGCCCTCAAAACTAGATGAACAACAGTGTGAaATGTGTAGAAGGGCACTCTTTCTCATGGCATTCCCTGTGTAATTTTTTTGGTATATTTCTTTTGGTTCCATTCATGCAACCTTGAGTGACACTCACATGAGGTGAGGGTCCAGTGGGTCTCCCCTTCTTTGACTCCTTTTCTCTAGTGAAGCTTTGCTTTGTTCATTTGCATGAGCTAGCTAGACAGATTAATTAAAATAAAATGCTTGTAACGATCATTATCCCTCACAATTCCCATTGAATTCTTGCCGATAATTTAATCACAATGGACATTCTATAGATTAGTGCGCATGTGCGTGCCGGTGTTAGGTTCAAATGAGAACAAATCGAAAGGAGTGATATTAAATCAGCAAAACAAGAGAACTATCCCTTTCATGTCTCTCTAGAGCCATTTTAATAAACCTAATAGATGCCTTTTTGGAGTCAAAAAGAAAGAGAGAGAGCTAGAGCTATAGCCAAACCGGAGAGAGACGAATTGAAGACGTCGTCGAGGTGGTAATGCATCCAATGTATATAGCAACATCAACTCGACCGACTGTTAAGTGTGTGCCATGTGAGGTTTAAGCAAAACAACAACTGAGGTGGATACTACTTTTCACCGGCCACCTGTCTAATTTCTCCTCCACATTAATTAATTAGCTGTTGTGTAATAGCATCTTGTAAAAGGCTTCAAATAGAGAACATCACATAATCTATACTATCTTCGTTTCAAGTTAATTATAAGACATTTTAGCATTGCACACATTCATATAGGTCTTAGAACCTGAAACGGATGAAGTATCAATCTAGTGGATATGCTGATTTTTTTATTTCTTATGAAAAAAATGTTTGCAATTGATTAATTAAGCATATATAATGCAGAGTGAAATTAGCACTGTTAATTCCTCTTGTTTGTTTAACTTTGGAGCATCTAGAAAAGGCTTTTCTTGGAGTGTACAAAGCCTTGACTTCCATCCCTCATGAGAACAATGAGAATTTGGATTCTTATGGAGAGCTGCATTTGGGGCAATTCTTGCATCTAATGCCTTAGCTTCCTACAAATGCAAGTATAGTACAATGAGAGGAGAGCTACATGTGTAGAGTGCATGCAGAGAGAGAGATCTTATCTGATGACCTTGACTTCCCCTACTACACCCCTCTCTTGTGTGTGAATTTGGCATATATGTGTTGGCCTGTGAAAATATTGCATTGCAAGATGGGGTCAGGTCAAGCCCTAGCTAGACATCTGAAAAGGTGTGAGGAGGAGAAGGTGGTGTTCAACTGGAGATGGGGAGAAAAAAGGAGAAATCTAAGGGCAAGGAGGCTCCACACAATGGCCTTGACAAGATGTACTAGAAATGCATAAGTTAGTTAATTTGCAGAGAGACCAGATTAAACTGATAATTATAATTATGATGGAAACGAGCACAGCACACAAGACACATGTTCTTGTCTATTCCTTAGGGTCACACCCGGGTTTTGGGGGTGGCCTTTGCACTACTTTGACTTTAGACCTCCCTTATAGAACCAACAAGTTTTGTGGAAAAGACACACACCCCAAAAAAATAATATGTATGCTAGGACAGTGTGGGTGTGGGTGTTTGTGTGTGTGTGTGTGTATGTGCAATTGTAGAAGTATGCAAGGCAGTTCACTAAACATAATCAAGGGAAAGGTAGAAAAAGACCACTTGGGGCATGCACATTTGTCTCACCAAGTTGTGGTTTGAATAAAAGGAGATCAGACAGAGTTTAGTAGTGAAAAGGTGCACTCACAATTCACAGAACAAAAGCTCCACATAGAACGCTTACTTTAATCATTTCGAATTTGAACTCTGATTTTCAATTGTTGATTCTATGCTAATTCCAAAAAACTTCCATATATTAGATATTTTGGTGGATATCATTCCAATTGTATTGGTACCTTAACAATTGTCAGTGCTTGCTACGAAAACTCTGTTTCTAGTTTTCAGATAATTGATGGCAATTAATTAGTACTGCATCAAGTTCAAATCTTCAGCTCGCAGATTGGACAAGGTTATTGTACTGGTCAAACAGTTCGATCTCACAGTGTTAGTGTTGCTGTTGTCTATGTGATTGATTACTAAGTTATTAATTAAACAAGCGACCAAGTACCAAGAGGAGAGTGCACTACAGCACACTTGTCCCATTTTATATCGACCACCAAAAATGACAAGCAATTACGCAACTGAAGATGATGATTTGGCACTGATCTAACGAATGAAAGATTGTTCCCACTCTTCAAGTTCCTATGATCCATGTTGATTGGTCTGATCATCCCCAATGGCATTGTCCTGCATTTGACTGAACAATGATTAACATAAGCATGCATGGTTTCTTGTTGTTAACTCTTTTGTTTACTTGGGATTGGCAGGTGGCAGGTGATGATCAGTGAAGCAGCATATGATATCTAAACTGAGAGTAGTAGTAGAAGAAGAAGAAGCTAGTACAGAGGAGTGTATGTGTTGGAGCTAAAACTGACAAGTACGAGACTACAGCTCCTTGCAAAAGGGGGCTCCTGACCATACATTGCTATAGGCTGGCTCTACACTCTACACACTACTACTGTCTACACATGCAATTATACACACAGAGATGAAATGCATCTTCGTCTCTCCCAGTCCCAGCTACTAGGCCACTTGTGCGAGCTTTGCCTACAAGGATGATCATGGATGCAGAGGCAGAGGCAGAGCACGCAGCAACCACTCCCTGGACCCTGCAGCAGCAGCCTGGGCAAGGCTATGTAGGTAGAAGAATGGAGATATGATGTGTGGTAGATATCTACATACTATATAATAGATATATATGTTTTTTTGGATTTAAGTAAGATACATGGTAGAAGTGTATGCCATGAGTGATTTTCAGGGGACATCGGTGTTGGTCGTTGTTGCTTAAGGAGAATGATGGTGACAAAAAATGTATGTTAGAGATCAAAGTCTTGGAGTTCTATTATAAAGCCCCGTTCGGTAGTGAGCTAGTAGTGGCAATGTTTTCCTTTTAGCATGTTTTCCAAACTGCTAACCGACTGCTAAGATTAGAAGCTTAATCAGTTGCTAAACAATTTGGTATGTGTTTTCTAAGGATTTGAGTTTAAGGACTCTTGTATGGATTTTTATTTGTTGATTTCTTAACTAATGTTGTTGGTTTAACTTAACTAGTTTTAAAAGAGGTATTTTACTGTTCTTAAGGTTGTGCAGTACCAAATGGCAAATCGTGACCGTTGATCTAGCATCATCCAACGGTCAAAAATCGTCCGTACCTCATTGAAGCGGTATCGTGGGTGAGAGGGTACGTCTGTACTTTCACGTGCGGCATCACTTTCTTTCGTGTTTCGCTTTCTTCTCTCTTTCACGATAGGAAAAAAATCGCCGGGGAAGAGCAGTGAGAGAAACTAGCCCTAAATCGCAGGGCTGGGGTGGCGAGAGGCAAGGGCAACGAGAGATGGTGGCGAGAGCACGGGCATGAAGGTCACGAATCCTAGATGGGGACATTCCCGGTGGTAGCCTCGATGCGACTGTAGTGTGGTGACCTCGATGTGCGATGGCGGCGCGGCGCAGACGGCCGGCACGGACGACCTGATGCGGTAGATGGAACAGAGGAGAAGAGAGTGGCACAGAGGATGTCGCTATTGGCTGAGTGGGCAGTGATTAGCAGCGGTATCTCATTTTCGTTAGCCCGATCATACCCCTGCTAAACCAACGGTTATATTATATTGATACCTCGTGTTACATTGTTCCCCGTAGATTCTTAAGGACGGGAAATATGATCGTTTAGAAAACATTGAAACACTTACACTGTAACATAAAACATATGGTTTCGTAAAAGAAAAAAAAAGTATATGCATGCCATTGGGATTGGTGAGATGATAAGGTAGAGGCAGTAAAAAAGAATGGAGACGGCTACGCCGACGCCGTGTACAAGGGAACAGTAGGTCGTGCGAGTGAGAGTGGCCTCCCCGTGGGACGACGTGTCGCCGCCGCATTGCCCCGCGGGACGCCAGCCAGCCACAGCCACAGAGCCGAGCCATACGGCCGCGGCGCGCACGAGAGACTTGTACACCGGCTACGGCGCCGACAACGCTAGCTACTATAGCGCGCGCTCTGGGCTGCCGCGCCGCGCCGGCCGCTCCCAGGACGTGGGCGCGCGCGTGCGCGTGCGCGTCCGTGCGTGCGTGCGTGACGGCGTCTGCGCGCGCGCCGCGCCGATCGATCGATCGTTCGGCTAGCTAGCTGTGGTAGCTGCCCTGCGCACGCACGCCGCGCGCGGGCTATGTATGCACCACCGGCGCAATGCACACCGCCGCGCGCGACCGGCCGGCGCCATACTCTCCCCCGGCGCGCCTCTCGCTTTGTACTCAACTACGACTTGCTTCTGGTGTCTTACTACGTAGGAGTACCTGTTTTCTTTTCTTTCTTTTTTACACAACATTTAACAACCCTAGCTACAACATTTTTTAATTTTCTCTCTTGTTACCATACAAAGCATCAATAATAAGGAATGGAAATGGTGATAGCTAGAAATTCTTGTTCTAAAAAGGAGAAATTATCGGCCAACTGAGCATTGTTTTCATATCGTTTTTGACCTTTTCCATTTCTCCCATATAGCATTTTTGTTTTTCTTTTCCAACGACATTTTGCAGTCGTTAATAAATAGTTAAATTGGTAAATATGAAAAAATTTTGACCGGTCAATAATCATTTTCATAATGTCTCTGACCATTTTTCATGTGTTAAAGATACAGCTATGAGCAGGTTTCAAAAAACGATCGGTTTTCACGAGAACCGCTTGGTTTTCGTGAAACTGCCCACGGTCAATTTAGGGTTACATATCAGTTTTAGGCTAGTTTCCGTAGTACATTGATTGAAAATCCCCGATTTTATCAGTTTTTGGGTAAACCGGTGAGAAGGGTTTTTTTATTTCCAAAACGAAAAGGTAAATCCCGGCCATGAGCGAGTGAAAGGCATGACACACACTACCAGGAAACAGACTTTCCCTCACGGCCTAAAACCGTCAGTATTAAGGATTTTCCGTCAGGAGTACTCTTCTCTGACGGGTAGCCGTCAGGACTGTACCGACAGGGGTAGACTGTCAGGAAAAGGTCATCTTTCGCGTCGGTCGCCTGTCACGGCTGTGATCCTGACGGCCCTTCGTGAATCCTGACGGTTAGTCCTGTCGGCTGTTCTGCCGTGCGAGGAGGGAATGCTCGGGTCGTCATACCGTCAAGGTTAGCCGTCAGGGATAAGTCCTGACGGTCTGCACCGACAGGACAGGAAAAAATAAACCCTGACGTGTCCANNNNNNNNNNACTTTTTCCCGGAACTGGATGGCGCCAACTTTGCTTTTCGTTCGCGCGTACTCCGTTTTTCTTGTCCCCACTGCAATGTGCCTGACGGGTTCGTGGCTCCGAGAGGATAGCGTGACTTTTTCGTGTCGTGAGTTTGCTTCCGTGAGGGTACGTCAATGTTTTCTGACGCACAGTTCAAGGCCGCCAGAATCAACTTCTGCCGTCAGGGGATGATGGTTTTCTGGTAGTGACACAGGTAGCTAGATAGCAATAGCATAGCAAGCAGCTCGAGTCACTACTCACTAGTAGACGACTACCAGTGTGTCACACACTCACACTAGTCTATATACATATAGCTGTCAAATGTATACATGTGATGGGTATAGCTAGCTCAGCTCTTGACCGACCGGGCATGCAGTCCAAGTGTCGTGCGTGTAGAGGATAAGAAGAGTCGAGATGATGTACACAGTACAGATGGATGGAACGGGGGTAGAAGGATAGGATGATATGTGTAGGAGTAGAGCACTGTTCACGCAAGCACATTGCTGATGATGATGATGATGCATGGTGTGGTCGTAGACGAGAGAGAGAGAGAGAGAGGCTAACTTCACTTGTTCTGCAGAGGAGGCGACGCGTCAGCTGCCTCTGCCAGCGCCCCCCGAAATGGTAACCAAGGATTGTGTTTGGTTTGCTTTGGTTGTGCCTTTTCCACCGGGGAAATGGTAACATCTCCTCATACTTCTCCTCCTCCCCAACTGGCCAAACCAACAAGAAGTATATACACTAGTAGTAGACTACTAGTACTATACTGTACTATTGGAGTAGTACTAGGGCTAGTGCTAGCCGTATAGTATGAGATATTGAGATATGACAACATTTTTTTCTCCTGTGTTTTGGGCCTCTTTGGATCATTGCCCAAAAAAAATGGCATTCAAAAATCGTCACTCATTTGGTTTAGATAAGAAAAATTGGCATTGCCAAATTATTTAGCATCCTTTCTATGCCATTGCATTTGGCTTGGCTAAGATTGGTATCTGCACCAGTACTGTAAAAAAACAATAGTGGTCAAGCTCTATTTTTGTGTTTTTTATAAGTTAGTCTACGATATTTTCTAATATTATGTAATAGTCTAATATTTAAATAAGTATGAACAAAGCATAGGATGGCATTTTACAGCAACAGAGCCCAACTTTTGGGCCTTTTTTTTTGCCAGGATTCGAGACGTACGGCAGTGGCAGTGTGCAATGCAATCGCAGTTCGACACTCAAAAAGGCAAGGATGGCCACAAGCTTGGGAGATCATGCTACTGTAGCACAGCTACAGTAAGACGGCCTACAGGGAGGTATGATGAGTTTTTAAGACAATGTTGACTCCTCGGGAAATAACCAGCCTGTATGCCAGATTCATTCGCCCAATCACTGGATCTCATAATCCCAGGAAAAGACACAACAAGCAGGAATTCTGCAAGCAAAGGTCCAGACAGGTTTTGCCAATCGTTTGAGAGATGGAAGAATATCCAGTTCAGAATAACACCATCATTTCATTTTCCCCCCGACATCTCAAGCTGAATCATCATATCAGCATCATCGTACAACCAAAAGAAAGAAGAATCGTATAGAATACAACGAAATTCGTGTTTGACTGAGTTCAATGCCCCAGGTGAGGAAACAGCAAGCCAGCACCCATAATTCAGTTTTGCAGCACTGGATTTCACAGGTTTTGTATTGTTCACTGTAAATTGTATACAAGTGCTAGTCTTGAGGTCTTGCCTCTCTCGACAAATGTGGCTTCCGGTCATCATGTGACAGGCATGCAGCCCGCAAATGGGATTTCCAGTGTCAAAATGCCAGGAAGAGCAAGTGCTTACAATGCTTACAAGAAATGGGACTCACAAAAAAGTGAAATCAAGAAAAATGACAACAGCAACGCCTTCAGCTCCCTAATACCAGAGAAGTTAAAGAATCATAGGGATTTCAACTTTTTCTTCTTCGATGCTTTTTGGGACTTGGAATCTTTAGCAGCCTGCATCCCAGAATCGTTCATCAGTATTTTCCACCAAGCAAAAATATGTAAAACTAAAAATATTCAAACTATTTTCCACGGTATAGCTATGTGTGGCTGTGCTATTATGAACGGAGTATGTCCATCTGGTAAGCCAAGAAGGCAGTACTTAGACCCTGATTTTTACCAAGTAGACTATGCAATGACAGTAACCCAGAAGCTTAGTCTCCTGATTCTCCTCTTTCTTGTGAAGGAAAACTAGTAAAAGGGTATTACAGTATTATTACCTTTAGATTTTTCTTTTTATTTTTCTTCTTTTTCTTGCTCTGTTCTCCTTCGTTTTGAAAACTCTTATCCTTCTGAGCAATATGATATGACTGTCAGATACATGTCAAAAAACTTTCGGCGTATGGTATATAAAAGCAGCAAAATTGAAACAATTCACAGACATTCTCAAGTGAATGTTCATATACTTGCCTTATTCTTCCTTT

>BSI325

TTCTGAACCTGACGTACGCAAGAATCAGCATCAAGTACCTGACGAAATGGTTGCTTGGCTGACACTTGTCCAGTGTGAGCTTTCCGTTGAACTGTCAATTGCTTCCCTCCTTTTTCCCAGCTTTTCTGTACTTGTTGCCCATGTCGTTCAGTTCCTCATCTTCTTCAATTTTCTTCTCCATTTCTCAATCCATTGTCAGTACTACATATGTGTGTACTTCTCGCGGCGCCATTCTTGTCATCTAATTGCAGGTTAGTTGTAAAATGTAAAATCGAATTGGACATTTTGAACCAGGTCATGGATTAATTGATTAAGATGCTAGAAGAAATTAACAAGCTGTGCCATGCAATATATCATGCATGCATGCATGAATATGATGGCTAAGTAGGTACTAATGCTAATATAGAAGAGAGAGAGAGAGAGAGAGAGAGAGAGAGAGAGAGAGAGAGAGATCATCTGCCTAAGTACATATTTGAAGAAGCTCTACTTAATTAACTAGAAATGGCGCCAAGCCACTCTTCTTGTTCGATCTACTGCTAGCTGCTGCTGCTGCTGCTGCTGCTATACTACTCGATCTCTTGCTCGATCGATCAAACGCAGATTGATCAAGATCAACTCGATCTGATCATGGTAGACAGGAAATGATATATGCATGATCGCTCAGAGGCAAAGTGCGTGATTAGCCATGCAATGCCCGGTGCAACTCGATCAATGGGAGAGGAAGCTGAATGGAGAGTAGGAGTCGGAGCCCTGCGACGAGGCGACCATGTCGGCGGCGCCGCCGCTCGCCGGGAACCCGCAGGCGCCGAGCTGGTCCGCCGCGTCGCCGCCGCCCCAGAAGCCGGCGACCATCTGCGCGAGGTCGTCGACGTCCTCCCGGAGCCCCATCATGCCGTAGGCGTCGGCGTCGGAGTAGCGCCGCATGTCCTGATGATCGGCCGCGGCGCCGCCGCCCCTCGGCCGGAGGCAGCTCTCCGGCACCACGCTGCTCAGGTACCCGGAGTTGTCGTCGGCGCCGGAGAAGAGGAAGTCGTGGCCGTTCCTGTCCATGTCCAGCAGCGACGACGACATGCTGGAGCGGTGGGGATCAACCGGGACCATCACCGGCATCGTCGAGCACTCGCCCACCGACGACGCGCCCGACGCCGCGCCATGTCCGTGGTGGTGGTGGTGGTGGTGGTGGTGACCGTACGAGCCAATGTGCGGCGCCGCGCCCACGCCGCCGCCGTACTGCACCGAGGACGGCGCGGCGGCGGCAGCGGCGTACTGCGGCGCGTGGAACGGCGCGAGGAACGGCGGGTAGTTGTAGGCGGCGTGGGTGTAGACGAAGTTGGTGCGCGCCTGGGCGCCCTTCATGGACAGCGCGGCGCGGTCGTACGCCAGCGCCGCCTCCTGCGCCGTGTCGAACGTGCCCAGCCAGTGCCGCTCCTTGGTGGTCGGGTCGCGTATCTCGGCAGCGTACCTCCCCCACGGCCGCCGCCGCACGCCGAGGAACCTCCCTGGCTCCTGCGCGCGCCGCCTGCTGCGCCCCGACGGCGGCCGCTCGCTCATCGGCGACGACGGCGGCGACGGCTGGCTCGCCGGCTTCGGCGGCTCCGAGAACGCCATCAGGCTGGCCTGGCTGCTGCTGCTGCTGCTGCTACTGCCGCTGCCTCGAGTGTTCATGACCAATGCAATATTGCAATATTGCAATGCAATGCAAGAGTGAGAGTGAGAGTGAGCTAGGCTTTAGCTAAGCTAAGGTATATGAATGAGCTCGAGCTAAGCTTAGCTTGTGTGTAGTGCTCAAATGGGAGGGATTCAAGGGTGGTATTTAAATGGGTCTTGGAGAGAGAGGTCACTGTGGATGAGATGGCAGAGAGGGGTGGCATGCATGCACTGCACTTGTGTTAGCTAGACCTATAGCTGCATCATATCAAGGTTAGTTTGTAAGTATTCATCTTGTTTTCCAATGTGAGGTTTGGATTTGTGTGCCCTAATTTAACCTTAGGACCAGTAGAGGGGAATGTTGTGTGCTACTAATGTTTGTGTGTGAGTGTGTTGCTTCAAAATTAAGAATGGTTGGAATGTTCTCCCCTTAGTTTTCATACACTTCATTTATGATGACAATGCATGCTAGCTCTCTACCACACATGTATGCAAAGTTATCATCCTATAGGTATAATATGGGGGTATGGCATACAACATATACAGTCCAACACCAGGCAGCATCTGAAAGTGCCACATTAATCAAGCTAGTGACCAAGAAGCCCCTGCCAAAGCAACTCTTTAAATTTTGCTGGTCCTACATATATTCTAATTGTGGTTTAATTAAGCTAGTTCTAATAATTTCTGCCTTAAGCTTGCATGGAGTCATGATTCACTCCTGAGTTAGACAGTATTACAAACTAATCAGATAATGAAAAGATGCCTGCCACTGGGTTAGGAAAAGGATCAGGGAAAGAAGAGAACATATGTAACCTAGTCATCCACCTTTTTAACAATTGTAATTTGTGTGCTCCAATAAATTTTAAAAAATGAAATCTTTGCTCCAAGATACTACTTCTATAGCTATATATTATGATACATGTCAAAATGCTACTACACACAATAATGCCCATTTTTTACAGGCCATATGGCTTTGCTTTCCTTCGTATCCATGTGCTTGCTTGCGCAATACATGCATGCATGCAAGTTAAAAAGATCAAACAAAAAAAAACCTTAAAGCTATACTTATATTTGCCTCATTGCATAAGCACTTAAGAAGCTTTCAAATGGAGTGGTTAGCTTGCCCTCAAAACTAGATGAACAACAGTGTGAAATGTGTAGAAGGGCACTCTTTCTCATGGCATTCCCTGTGTAATTTTTTTGGTATATTTCTTTTGGTTCCATTCATGCAACCTTGAGTGACACTCACATGAGGTGAGGGTCCAGTGGGTCTCCCCTTCTTTGACTCCTTTTCTCTAGTGAAGCTTTGCTTTGTTCATTTGCATGAGCTAGCTAGACAGATTAATTAAAATAAAATGCTTGTAACGATCATTATCCCTCACAATTCCCATTGAATTCTTGCCGATAATTTAATCACAATGGACATTCTATAGATTAGTGCGCATGTGCGTGCCGGTGTTAGGTTCAAATGAGAACAAATCGAAAGGAGTGATATTAAATCAGCAAAACAAGAGAACTATCCCTTTCATGTCTCTCTAGAGCCATTTTAATAAACCTAATAGATGCCTTTTTGGAGTCAAAAAGAAAGAGAGAGAGCTAGAGCTATAGCCAAACCGGAGAGAGACGAATTGAAGACGTCGTCGAGGTGGTAATGCATCCAATGTATATAGCAACATCAACTCGACCGACTGTTAAGTGTGTGCCATGTGAGGTTTAAGCAAAACAACAACTGAGGTGGATACTACTTTTCACCGGCCACCTGTCTAATTTCTCCTCCACATTAATTAATTAGCTGTTGTGTAATAGCATCTTGTAAAAGGCTTCAAATAGAGAACATCACATAATCTATACTATCTTCGTTTCAAGTTAATTATAAGACATTTTAGCATTGCACACATTCATATAGGTCTTAGAACCTGAAACGGATGAAGTATCAATCTAGTGGATATGCTGATTTTTTTATTTCTTATGAAAAAAATGTTTGCAATTGATTAATTAAGCATATATAATGCAGAGTGAAATTAGCACTGTTAATTCCTCTTGTTTGTTTAACTTTGGAGCATCTAGAAAAGGCTTTTCTTGGAGTGTACAAAGCCTTGACTTCCATCCCTCATGAGAACAATGAGAATTTGGATTCTTATGGAGAGCTGCATTTGGGGCAATTCTTGCATCTAATGCCTTAGCTTCCTACAAATGCAAGTATAGTACAATGAGAGGAGAGCTACATGTGTAGAGTGCATGCAGAGAGAGAGATCTTATCTGATGACCTTGACTTCCCCTACTACACCCCTCTCTTGTGTGTGAATTTGGCATATATGTGTTGGCCTGTGAAAATATTGCATTGCAAGATGGGGTCAGGTCAAGCCCTAGCTAGACATCTGAAAAGGTGTGAGGAGGAGAAGGTGGTGTTCAACTGGAGATGGGGAGAAAAAAGGAGAAATCTAAGGGCAAGGAGGCTCCACACAATGGCCTTGACAAGATGTACTAGAAATGCATAAGTTAGTTAATTTGCAGAGAGACCAGATTAAACTGATAATTATAATTATGATGGAAACGAGCACAGCACACAAGACACATGTTCTTGTCTATTCCTTAGGGTCACACCCGGGTTTTGGGGGTGGCCTTTGCACTACTTTGACTTTAGACCTCCCTTATAGAACCAACAAGTTTTGTGGAAAAGACACACACCCCAAAAAAATAATATGTATGCTAGGACAGTGTGGGTGTGGGTGTTTGTGTGTGTGTGTGTGTATGTGCAATTGTAgAAGTATGCAAGGCAGTTCACTAAACATAATCAAGGGAAAGGTAgAAAAAGACCACTTGGGGCATGCACATTTGTCTCACCAAGTTGTGGTTTGAATAAAAGGAGATCAGACAGAGTTTAGTAGTGAAAAGGTGCACTCACAATTCACAGAACAAAAGCTCCACATAGAACGCTTACTTTAATCATTTCGAATTTGAACTCTGATTTTCAATTGTTGATTCTATGCTAATTCCAAAAAACTTCCATATATTAGATATTTTGGTGGATATCATTCCAATTGTATTGGTACCTTAACAATTGTCAGTGCTTGCTACGAAAACTCTGTTTCTAGTTTTCAGATAATTGATGGCAATTAATTAGTACTGCATCAAGTTCAAATCTTCAGCTCGCAGATTGGACAAGGTTATTGTACTGGTCAAACAGTTCGATCTCACAGTGTTAGTGTTGCTGTTGTCTATGTGATTGATTACTAAGTTATTAATTAAACAAGCGACCAAGTACCAAGAGGAGAGTGCACTACAGCACACTTGTCCCATTTTATATCGACCACCAAAAATGACAAGCAATTACGCAACTGAAGATGATGATTTGGCACTGATCTAACGAATGAAAGATTGTTCCCACTCTTCAAGTTCCTATGATCCATGTTGATTGGTCTGATCATCCCCAATGGCATTGTCCTGCATTTGACTGAACAATGATTAACATAAGCATGCATGGTTTCTTGTTGTTAACTCTTTTGTTTACTTGGGATTGGCAGGTGGCAGGTGATGATCAGTGAAGCAGCATATGATATCTAAACTGAGAGTAGTAGTAGAAGAAGAAGAAGCTAGTACAGAGGAGTGTATGTGTTGGAGCTAAAACTGACAAGTACGAGACTACAGCTCCTTGCAAAAGGGGGCTCCTGACCATACATTGCTATAGGCTGGCTCTACACTCTACACACTACTACTGTCTACACATGCAATTATACACACAGAGATGAAATGCATCTTCGTCTCTCCCAGTCCCAGCTACTAGGCCACTTGTGCGAGCTTTGCCTACAAGGATGATCATGGATGCAGAGGCAGAGGCAGAGCACGCAGCAACCACTCCCTGGACCCTGCAGCAGCAGCCTGGGCAAGGCTATGTAGGTAGAAGAATGGAGATATGATGTGTGGTAGATATCTACATACTATATAATAGATATATATGTTTTTTTGGATTTAAGTAAGATACATGGTAGAAGTGTATGCCATGAGTGATTTTCAGGGGACATCGGTGTTGGTCGTTGTTGCTTAAGGAGAATGATGGTGACAAAAAATGTATGTTAGAGATCAAAGTCTTGGAGTTCTATTATAAAGCCCCGTTCGGTAGTGAGCTAGTAGTGGCAATGTTTTCCTTTTAGCATGTTTTCCAAACTGCTAACCGACTGCTAAGATTAGAAGCTTAATCAGTTGCTAAACAATTTGGTATGTGTTTTCTAAGGATTTGAGTTTAAGGACTCTTGTATGGATTTTTATTTGTTGATTTCTTAACTAATGTTGTTGGTTTAACTTAACTAGTTTTAAAAGAGGTATTTTACTGTTCTTAAGGTTGTGCAGTACCAAATGGCAAATCGTGACCGTTGATCTAGCATCATCCAACGGTCAAAAATCGTCCGTACCTCATTGAAGCGGTATCGTGGGTGAGAGGGTACGTCTGTACTTTCACGTGCGGCATCACTTTCTTTCGTGTTTCGCTTTCTTCTCTCTTTCACGATAGGAAAAAAATCGCCGGGGAAGAGCAGTGAGAGAAACTAGCCCTAAATCGCAGGGCTGGGGTGGCGAGAGGCAAGGGCAACGAGAGATGGTGGCGAGAGCACGGGCATGAAGGTCACGAATCCTAGATGGGGACATTCCCGGTGGTAGCCTCGATGCGACTGTAGTGTGGTGACCTCGATGTGCGATGGCGGCGCGGCGCAGACGGCCGGCACGGACGACCTGATGCGGTAGATGGAACAGAGGAGAAGAGAGTGGCACAGAGGATGTCGCTATTGGCTGAGTGGGCAGTGATTAGCAGCGGTATCTCATTTTCGTTAGCCCGATCATACCCCTGCTAAACCAACGGTTATATTATATTGATACCTCGTGTTACATTGTTCCCCGTAGATTCTTAAGGACGGGAAATATGATCGTTTAGAAAACATTGAAACACTTACACTGTAACATAAAACATATGGTTTCGTAAAAGAAAAAAAAAGTATATGCATGCCATTGGGATTGGTGAGATGATAAGGTAGAGGCAGTAAAAAAGAATGGAGACGGCTACGCCGACGCCGTGTACAAGGGAACAGTAGGTCGTGCGAGTGAGAGTGGCCTCCCCGTGGGACGACGTGTCGCCGCCGCATTGCCCCGCGGGACGCCAGCCAGCCACAGCCACAGAGCCGAGCCATACGGCCGCGGCGCGCACGAGAGACTTGTACACCGGCTACGGCGCCGACAACGCTAGCTACTATAGCGCGCGCTCTGGGCTGCCGCGCCGCGCCGGCCGCTCCCAGGACGTGGGCGCGCGCGTGCGCGTGCGCGTCCGTGCGTGCGTGCGTGACGGCGTCTGCGCGCGCGCCGCGCCGATCGATCGATCGTTCGGCTAGCTAGCTGTGGTAGCTGCCCTGCGCACGCACGCCGCGCGCGGGCTATGTATGCACCACCGGCGCAATGCACACCGCCGCGCGCGACCGGCCGGCGCCATACTCTCCCCCGGCGCGCCTCTCGCTTTGTACTCAACTACGACTTGCTTCTGGTGTCTTACTACGTAGGAGTACCTGTTTTCTTTTCTTTCTTTTTTACACAACATTTAACAACCCTAGCTACAACATTTTTTAATTTTCTCTCTTGTTACCATACAAAGCATCAATAATAAGGAATGGAAATGGTGATAGCTAGAAATTCTTGTTCTAAAAAGGAGAAATTATCGGCCAACTGAGCATTGTTTTCATATCGTTTTTGACCTTTTCCATTTCTCCCATATAGCATTTTTGTTTTTCTTTTCCAACGACATTTTGCAGTCGTTAATAAATAGTTAAATTGGTAAATATGAAAAAATTTTGACCGGTCAATAATCATTTTCATAATGTCTCTGACCATTTTTCATGTGTTAAAGATACAGCTATGAGCAGGTTTCAAAAAACGATCGGTTTTCACGAGAACCGCTTGGTTTTCGTGAAACTGCCCACGGTCAATTTAGGGTTACATATCAGTTTTAGGCTAGTTTCCGTAGTACATTGATTGAAAATCCCCGATTTTATCAGTTTTTGGGTAAACCGGTGAGAAGGGTTTTTTTATTTCCAAAACGAAAAGGTAAATCCCGGCCATGAGCGAGTGAAAGGCATGACACACACTACCAGGAAACAGACTTTCCCTCACGGCCTAAAACCGTCAGTATTAAGGATTTTCCGTCAGGAGTACTCTTCTCTGACGGGTAGCCGTCAGGACTGTACCGACAGGGGTAGACTGTCAGGAAAAGGTCATCTTTCGCGTCGGTCGCCTGTCACGGCTGTGATCCTGACGGCCCTTCGTGAATCCTGACGGTTAGTCCTGTCGGCTGTTCTGCCGTGCGAGGAGGGAATGCTCGGGTCGTCATACCGTCAAGGTTAGCCGTCAGGGATAAGTCCTGACGGTCTGCACCGACAGGACAGGAAAAAATAAACCCTNNNNNNNNNNCCCGGAACTGGATGGCGCCAACTTTGCTTTTCGTTCGCGCGTACTCCGTTTTTCTTGTCCCCACTGCAATGTGCCTGACGGGTTCGTGGCTCCGAGAGGATAGCGTGACTTTTTCGTGTCGTGAGTTTGCTTCCGTGAGGGTACGTCAATGTTTTCTGACGCACAGTTCAAGGCCGCCAGAATCAACTTCTGCCGTCAGGGGATGATGGTTTTCTGGTAGTGACACAGGTAGCTAGATAGCAATAGCATAGCAAGCAGCTCGAGTCACTACTCACTAGTAGACGACTACCAGTGTGTCACACACTCACACTAGTCTATATACATATAGCTGTCAAATGTATACATGTGATGGGTATAGCTAGCTCAGCTCTTGACCGACCGGGCATGCAGTCCAAGTGTCGTGCGTGTAGAGGATAAGAAGAGTCGAGATGATGTACACAGTACAGATGGATGGAACGGGGGTAGAAGGATAGGATGATATGTGTAGGAGTAGAGCACTGTTCACGCAAGCACATTGCTGATGATGATGATGATGCATGGTGTGGTCGTAGACGAGAGAGAGAGAGAGAGAGGCTAACTTCACTTGTTCTGCAGAGGAGGCGACGCGTCAGCTGCCTCTGCCAGCGCCCCCCGAAATGGTAACCAAGGATTGTGTTTGGTTTGCTTTGGTTGTGCCTTTTCCACCGGGGAAATGGTAACATCTCCTCATACTTCTCCTCCTCCCCAACTGGCCAAACCAACAAGAAGTATATACACTAGTAGTAGACTACTAGTACTATACTGTACTATTGGAGTAGTACTAGGGCTAGTGCTAGCCGTATAGTATGAGATATTGAGATATGACAACATTTTTTTCTCCTGTGTTTTGGGCCTCTTTGGATCATTGCCCAAAAAAAATGGCATTCAAAAATCGTCACTCATTTGGTTTAGATAAGAAAAATTGGCATTGCCAAATTATTTAGCATCCTTTCTATGCCATTGCATTTGGCTTGGCTAAGATTGGTATCTGCACCAGTACTGTAAAAAAACAATAGTGGTCAAGCTCTATTTTTGTGTTTTTTATAAGTTAGTCTACGATATTTTCTAATATTATGTAATAGTCTAATATTTAAATAAGTATGAACAAAGCATAGGATGGCATTTTACAGCAACAGAGCCCAACTTTTGGGCCTTTTTTTTTGCCAGGATTCGAGACGTACGGCAGTGGCAGTGTGCAATGCAATCGCAGTTCGACACTCAAAAAGGCAAGGATGGCCACAAGCTTGGGAGATCATGCTACTGTAGCACAGCTACAGTAAGACGGCCTACAGGGAGGTATGATGAGTTTTTAAGACAATGTTGACTCCTCGGGAAATAACCAGCCTGTATGCCAGATTCATTCGCCCAATCACTGGATCTCATAATCCCAGGAAAAGACACAACAAGCAGGAATTCTGCAAGCAAAGGTCCAGACAGGTTTTGCCAATCGTTTGAGAGATGGAAGAATATCCAGTTCAGAATAACACCATCATTTCATTTTCCCCCCGACATCTCAAGCTGAATCATCATATCAGCATCATCGTACAACCAAAAGAAAGAAGAATCGTATAGAATACAACGAAATTCGTGTTTGACTGAGTTCAATGCCCCAGGTGAGGAAACAGCAAGCCAGCACCCATAATTCAGTTTTGCAGCACTGGATTTCACAGGTTTTGTATTGTTCACTGTAAATTGTATACAAGTGCTAGTCTTGAGGTCTTGCCTCTCTCGACAAATGTGGCTTCCGGTCATCATGTGACAGGCATGCAGCCCGCAAATGGGATTTCCAGTGTCAAAATGCCAGGAAGAGCAAGTGCTTACAATGCTTACAAGAAATGGGACTCACAAAAAAGTGAAATCAAGAAAAATGACAACAGCAACGCCTTCAGCTCCCTAATACCAGAGAAGTTAAAGAATCATAGGGATTTCAACTTTTTCTTCTTCGATGCTTTTTGGGACTTGGAATCTTTAGCAGCCTGCATCCCAGAATCGTTCATCAGTATTTTCCACCAAGCAAAAATATGTAAAACTAAAAATATTCAAACTATTTTCCACGGTATAGCTATGTGTGGCTGTGCTATTATGAACGGAGTATGTCCATCTGGTAAGCCAAGAAGGCAGTACTTAGACCCTGATTTTTACCAAGTAGACTATGCAATGACAGTAACCCAGAAGCTTAGTCTCCTGATTCTCCTCTTTCTTGTGAAGGAAAACTAGTAAAAGGGTATTACAGTATTATTACCTTTAGATTTTTCTTTTTATTTTTCTTCTTTTTCTTGCTCTGTTCTCCTTCGTTTTGAAAACTCTTATCCTTCTGAGCAATATGATATGACTGTCAGATACATGTCAAAAAACTTTCGGCGTATGGTATATAAAAGCAGCAAAATTGAAACAATTCACAGACATTCTCAAGTGAATGTTCATATAC

>Kasalth

TTCTGAACCTGACGTACGCAAGAATCAGCATCAAGTACCTGACGAAATGGTTGCTTGGCTGACACTTGTCCAGTGTGAGCTTTCCGTTGAACTGTCAATTGCTTCCCTCCTTTTTCCCAGCTTTTCTGTACTTGTTGCCCATGTCGTTCAGTTCCTCATCTTCTTCAATTTTCTTCTCCATTTCTCAATCCATTGTCAGTACTACATATGTGTGTACTTCTCGCGGCGCCATTCTTGTCATCTAATTGCAGGTTAGTTGTAAAATGTAAAATCGAATTGGACATTTTGAACCAGGTCATGGATTAATTGATTAAGATGCTAGAAGAAATTAACAAGCTGTGCCATGCAATATATCATGCATGCATGCATGAATATGATGGCTAAGTAGGTACTAATGCTAATATAGAAGAGAGAGAGAGAGAGAGAGAGAGAGAGAGAGAGAGAGAGAGAGAGAGAGAGAGAGAGATCATCTGCCTAAGTACATATTTGAAGAAGCTCTACTTAATTAACTAGAAATGGCGCCAAGCCACTCTTCTTGTTCGATCTACTGCTAGCTGCTGCTGCTGCTGCTGCTGCTATACTACTCGATCTCTTGCTCGATCGATCAAACGCAGATTGATCAAGATCAACTCGATCTGATCATGGTAGACAGGAAATGATATATGCATGATCGCTCAGAGGCAAAGTGCGTGATTAGCCATGCAATGCCCGGTGCAACTCGATCAATGGGAGAGGAAGCTGAATGGAGAGTAGGAGTCGGAGCCCTGCGACGAGGCGACCATGTCGGCGGCGCCGCCGCTCGCCGGGAACCCGCAGGCGCCGAGCTGGTCCGCCGCGTCGCCGCCGCCCCAGAAGCCGGCGACCATCTGCGCGAGGTCGTCGACGTCCTCCCGGAGCCCCATCATGCCGTAGGCGTCGGCGTCGGAGTAGCGCCGCATGTCCTGATGATCGGCCGCGGCGCCGCCGCCCCTCGGCCGGAGGCAGCTCTCCGGCACCACGCTGCTCAGGTACCCGGAGTTGTCGTCGGCGCCGGAGAAGAGGAAGTCGTGGCCGTTCCTGTCCATGTCCAGCAGCGACGACGACATGCTGGAGCGGTGGGGATCAACCGGGACCATCACCGGCATCGTCGAGCACTCGCCCACCGACGACGCGCCCGACGCCGCGCCATGTCCGTGGTGGTGGTGGTGGTGGTGGTGGTGACCGTACGAGCCAATGTGCGGCGCCGCGCCCACGCCGCCGCCGTACTGCACCGAGGACGGCGCGGCGGCGGCAGCGGCGTACTGCGGCGCGTGGAACGGCGCGAGGAACGGCGGGTAGTTGTAGGCGGCGTGGGTGTAGACGAAGTTGGTGCGCGCCTGGGCGCCCTTCATGGACAGCGCGGCGCGGTCGTACGCCAGCGCCGCCTCCTGCGCCGTGTCGAACGTGCCCAGCCAGTGCCGCTCCTTGGTGGTCGGGTCGCGTATCTCGGCAGCGTACCTCCCCCACGGCCGCCGCCGCACGCCGAGGAACCTCCCTGGCTCCTGCGCGCGCCGCCTGCTGCGCCCCGACGGCGGCCGCTCGCTCATCGGCGACGACGGCGGCGACGGCTGGCTCGCCGGCTTCGGCGGCTCCGAGAACGCCATCAGGCTGGCCTGGCTGCTGCTGCTGCTGCTGCTACTGCCGCTGCCTCGAGTGTTCATGACCAATGCAATATTGCAATATTGCAATGCAATGCAAGAGTGAGAGTGAGAGTGAGCTAGGCTTTAGCTAAGCTAAGGTATATGAATGAGCTCGAGCTAAGCTTAGCTTGTGTGTAGTGCTCAAATGGGAGGGATTCAAGGGTGGTATTTAAATGGGTCTTGGAGAGAGAGGTCACTGTGGATGAGATGGCAGAGAGGGGTGGCATGCATGCACTGCACTTGTGTTAGCTAGACCTATAGCTGCATCATATCAAGGTTAGTTTGTAAGTATTCATCTTGTTTTCCAATGTGAGGTTTGGATTTGTGTGCCCTAATTTAACCTTAGGACCAGTAGAGGGGAATGTTGTGTGCTACTAATGTTTGTGTGTGAGTGTGTTGCTTCAAAATTAAGAATGGTTGGAATGTTCTCCCCTTAGTTTTCATACACTTCATTTATGATGACAATGCATGCTAGCTCTCTACCACACATGTATGCAAAGTTATCATCCTATAGGTATAATATGGGGGTATGGCATACAACATATACAGTCCAACACCAGGCAGCATCTGAAAGTGCCACATTAATCAAGCTAGTGACCAAGAAGCCCCTGCCAAAGCAACTCTTTAAATTTTGCTGGTCCTACATATATTCTAATTGTGGTTTAATTAAGCTAGTTCTAATAATTTCTGCCTTAAGCTTGCATGGAGTCATGATTCACTCCTGAGTTAGACAGTATTACAAACTAATCAGATAATGAAAAGATGCCTGCCACTGGGTTAGGAAAAGGATCAGGGAAAGAAGAGAACATATGTAACCTAGTCATCCACCTTTTTAACAATTGTAATTTGTGTGCTCCAATAAATTTTAAAAAATGAAATCTTTGCTCCAAGATACTACTTCTATAGCTATATATTATGATACATGTCAAAATGCTACTACACACAATAATGCCCATTTTTTACAGGCCATATGGCTTTGCTTTCCTTCGTATCCATGTGCTTGCTTGCGCAATACATGCATGCATGCAAGTTAAAAAGATCAAACAAAAAAAAACCTTAAAGCTATACTTATATTTGCCTCATTGCATAAGCACTTAAGAAGCTTTCAAATGGAGTGGTTAGCTTGCCCTCAAAACTAGATGAACAACAGTGTGAAATGTGTAGAAGGGCACTCTTTCTCATGGCATTCCCTGTGTAATTTTTTTGGTATATTTCTTTTGGTTCCATTCATGCAACCTTGAGTGACACTCACATGAGGTGAGGGTCCAGTGGGTCTCCCCTTCTTTGACTCCTTTTCTCTAGTGAAGCTTTGCTTTGTTCATTTGCATGAGCTAGCTAGACAGATTAATTAAAATAAAATGCTTGTAACGATCATTATCCCTCACAATTCCCATTGAATTCTTGCCGATAATTTAATCACAATGGACATTCTATAGATTAGTGCGCATGTGCGTGCCGGTGTTAGGTTCAAATGAGAACAAATCGAAAGGAGTGATATTAAATCAGCAAAACAAGAGAACTATCCCTTTCATGTCTCTCTAGAGCCATTTTAATAAACCTAATAGATGCCTTTTTGGAGTCAAAAAGAAAGAGAGAGAGCTAGAGCTATAGCCAAACCGGAGAGAGACGAATTGAAGACGTCGTCGAGGTGGTAATGCATCCAATGTATATAGCAACATCAACTCGACCGACTGTTAAGTGTGTGCCATGTGAGGTTTAAGCAAAACAACAACTGAGGTGGATACTACTTTTCACCGGCCACCTGTCTAATTTCTCCTCCACATTAATTAATTAGCTGTTGTGTAATAGCATCTTGTAAAAGGCTTCAAATAGAGAACATCACATAATCTATACTATCTTCGTTTCAAGTTAATTATAAGACATTTTAGCATTGCACACATTCATATAGGTCTTAGAACCTGAAACGGATGAAGTATCAATCTAGTGGATATGCTGATTTTTTTATTTCTTATGAAAAAAATGTTTGCAATTGATTAATTAAGCATATATAATGCAGAGTGAAATTAGCACTGTTAATTCCTCTTGTTTGTTTAACTTTGGAGCATCTAGAAAAGGCTTTTCTTGGAGTGTACAAAGCCTTGACTTCCATCCCTCATGAGAACAATGAGAATTTGGATTCTTATGGAGAGCTGCATTTGGGGCAATTCTTGCATCTAATGCCTTAGCTTCCTACAAATGCAAGTATAGTACAATGAGAGGAGAGCTACATGTGTAGAGTGCATGCAGAGAGAGAGATCTTATCTGATGACCTTGACTTCCCCTACTACACCCCTCTCTTGTGTGTGAATTTGGCATATATGTGTTGGCCTGTGAAAATATTGCATTGCAAGATGGGGTCAGGTCAAGCCCTAGCTAGACATCTGAAAAGGTGTGAGGAGGAGAAGGTGGTGTTCAACTGGAGATGGGGAGAAAAAAGGAGAAATCTAAGGGCAAGGAGGCTCCACACAATGGCCTTGACAAGATGTACTAGAAATGCATAAGTTAGTTAATTTGCAGAGAGACCAGATTAAACTGATAATTATAATTATGATGGAAACGAGCACAGCACACAAGACACATGTTCTTGTCTATTCCTTAGGGTCACACCCGGGTTTTGGGGGTGGCCTTTGCACTACTTTGACTTTAGACCTCCCTTATAGAACCAACAAGTTTTGTGGAAAAGACACACACCCCAAAAAAATAATATGTATGCTAGGACAGTGTGGGTGTGGGTGTTTGTGTGTGTGTGTGTGTATGTGCAATTGTAGAAGTATGCAAGGCAGTTCACTAAACATAATCAAGGGAAAGGTAGAAAAAGACCACTTGGGGCATGCACATTTGTCTCACCAAGTTGTGGTTTGAATAAAAGGAGATCAGACAGAGTTTAGTAGTGAAAAGGTGCACTCACAATTCACAGAACAAAAGCTCCACATAGAACGCTTACTTTAATCATTTCGAATTTGAACTCTGATTTTCAATTGTTGATTCTATGCTAATTCCAAAAAACTTCCATATATTAGATATTTTGGTGGATATCATTCCAATTGTATTGGTACCTTAACAATTGTCAGTGCTTGCTACGAAAACTCTGTTTCTAGTTTTCAGATAATTGATGGCAATTAATTAGTACTGCATCAAGTTCAAATCTTCAGCTCGCAGATTGGACAAGGTTATTGTACTGGTCAAACAGTTCGATCTCACAGTGTTAGTGTTGCTGTTGTCTATGTGATTGATTACTAAGTTATTAATTAAACAAGCGACCAAGTACCAAGAGGAGAGTGCACTACAGCACACTTGTCCCATTTTATATCGACCACCAAAAATGACAAGCAATTACGCAACTGAAGATGATGATTTGGCACTGATCTAACGAATGAAAGATTGTTCCCACTCTTCAAGTTCCTATGATCCATGTTGATTGGTCTGATCATCCCCAATGGCATTGTCCTGCATTTGACTGAACAATGATTAACATAAGCATGCATGGTTTCTTGTTGTTAACTCTTTTGTTTACTTGGGATTGGCAGGTGGCAGGTGATGATCAGTGAAGCAGCATATGATATCTAAACTGAGAGTAGTAGTAGAAGAAGAAGAAGCTAGTACAGAGGAGTGTATGTGTTGGAGCTAAAACTGACAAGTACGAGACTACAGCTCCTTGCAAAAGGGGGCTCCTGACCATACATTGCTATAGGCTGGCTCTACACTCTACACACTACTACTGTCTACACATGCAATTATACACACAGAGATGAAATGCATCTTCGTCTCTCCCAGTCCCAGCTACTAGGCCACTTGTGCGAGCTTTGCCTACAAGGATGATCATGGATGCAGAGGCAGAGGCAGAGCACGCAGCAACCACTCCCTGGACCCTGCAGCAGCAGCCTGGGCAAGGCTATGTAGGTAGAAGAATGGAGATATGATGTGTGGTAGATATCTACATACTATATAATAGATATATATGTTTTTTTGGATTTAAGTAAGATACATGGTAGAAGTGTATGCCATGAGTGATTTTCAGGGGACATCGGTGTTGGTCGTTGTTGCTTAAGGAGAATGATGGTGACAAAAAATGTATGTTAGAGATCAAAGTCTTGGAGTTCTATTATAAAGCCCCGTTCGGTAGTGAGCTAGTAGTGGCAATGTTTTCCTTTTAGCATGTTTTCCAAACTGCTAACCGACTGCTAAGATTAGAAGCTTAATCAGTTGCTAAACAATTTGGTATGTGTTTTCTAAGGATTTGAGTTTAAGGACTCTTGTATGGATTTTTATTTGTTGATTTCTTAACTAATGTTGTTGGTTTAACTTAACTAGTTTTAAAAGAGGTATTTTACTGTTCTTAAGGTTGTGCAGTACCAAATGGCAAATCGTGACCGTTGATCTAGCATCATCCAACGGTCAAAAATCGTCCGTACCTCATTGAAGCGGTATCGTGGGTGAGAGGGTACGTCTGTACTTTCACGTGCGGCATCACTTTCTTTCGTGTTTCGCTTTCTTCTCTCTTTCACGATAGGAAAAAAATCGCCGGGGAAGAGCAGTGAGAGAAACTAGCCCTAAATCGCAGGGCTGGGGTGGCGAGAGGCAAGGGCAACGAGAGATGGTGGCGAGAGCACGGGCATGAAGGTCACGAATCCTAGATGGGGACATTCCCGGTGGTAGCCTCGATGCGACTGTAGTGTGGTGACCTCGATGTGCGATGGCGGCGCGGCGCAGACGGCCGGCACGGACGACCTGATGCGGTAGATGGAACAGAGGAGAAGAGAGTGGCACAGAGGATGTCGCTATTGGCTGAGTGGGCAGTGATTAGCAGCGGTATCTCATTTTCGTTAGCCCGATCATACCCCTGCTAAACCAACGGTTATATTATATTGATACCTCGTGTTACATTGTTCCCCGTAGATTCTTAAGGACGGGAAATATGATCGTTTAGAAAACATTGAAACACTTACACTGTAACATAAAACATATGGTTTCGTAAAAGAAAAAAAAAGTATATGCATGCCATTGGGATTGGTGAGATGATAAGGTAGAGGCAGTAAAAAAGAATGGAGACGGCTACGCCGACGCCGTGTACAAGGGAACAGTAGGTCGTGCGAGTGAGAGTGGCCTCCCCGTGGGACGACGTGTCGCCGCCGCATTGCCCCGCGGGACGCCAGCCAGCCACAGCCACAGAGCCGAGCCATACGGCCGCGGCGCGCACGAGAGACTTGTACACCGGCTACGGCGCCGACAACGCTAGCTACTATAGCGCGCGCTCTGGGCTGCCGCGCCGCGCCGGCCGCTCCCAGGACGTGGGCGCGCGCGTGCGCGTGCGCGTCCGTGCGTGCGTGCGCGTCCGTGCGTGCGTGCGTGACGGCGTCTGCGCGCGCGCCGCGCCGATCGATCGATCGTTCGGCTAGCTAGCTGTGGTAGCTGCCCTGCGCACGCACGCCGCGCGCGGGCTATGTATGCACCACCGGCGCAATGCACACCGCCGCGCGCGACCGGCCGGCGCCATACTCTCCCCCGGCGCGCCTCTCGCTTTGTACTCAACTACGACTTGCTTCTGGTGTCTTACTACGTAGGAGTACCTGTTTTCTTTTCTTTCTTTTTTACACAACATTTAACAACCCTAGCTACAACATTTTTTAATTTTCTCTCTTGTTACCATACAAAGCATCAATAATAAGGAATGGAAATGGTGATAGCTAGAAATTCTTGTTCTAAAAAGGAGAAATTATCGGCCAACTGAGCATTGTTTTCATATCGTTTTTGACCTTTTCCATTTCTCCCATATAGCATTTTTGTTTTTCTTTTCCAACGACATTTTGCAGTCGTTAATAAATAGTTAAATTGGTAAATATGAAAAAATTTTGACCGGTCAATAATCATTTTCATAATGTCTCTGACCATTTTTCATGTGTTAAAGATACAGCTATGAGCAGGTTTCAAAAAACGATCGGTTTTCACGAGAACCGCTTGGTTTTCGTGAAACTGCCCACGGTCAATTTAGGGTTACATATCAGTTTTAGGCTAGTTTCCGTAGTACATTGATTGAAAATCCCCGATTTTATCAGTTTTTGGGTAAACCGGTGAGAAGGGTTTTTTTATTTCCAAAACGAAAAGGTAAATCCCGGCCATGAGCGAGTGAAAGGCATGACACACACTACCAGGAAACAGACTTTCCCTCACGGCCTAAAACCGTCAGTATTAAGGATTTTCCGTCAGGAGTACTCTTCTCTGACGGGTAGCCGTCAGGACTGTACCGACAGGGGTAGACTGTCAGNNNNNNNNNNCACTCACACTAGTCTATATACATATAGCTGTCAAATGTATACATGTGATGGGTATAGCTAGCTCAGCTCTTGACCGACCGGGCATGCAGTCCAAGTGTCGTGCGTGTAGAGGATAAGAAGAGTCGAGATGATGTACACAGTACAGATGGATGGAACGGGGGTAGAAGGATAGGATGATATGTGTAGGAGTAGAGCACTGTTCACGCAAGCACATTGCTGATGATGATGATGATGCATGGTGTGGTCGTAGACGAGAGAGAGAGAGAGAGAGGCTAACTTCACTTGTTCTGCAGAGGAGGCGACGCGTCAGCTGCCTCTGCCAGCGCCCCCCGAAATGGTAACCAAGGATTGTGTTTGGTTTGCTTTGGTTGTGCCTTTTCCACCGGGGAAATGGTAACATCTCCTCATACTTCTCCTCCTCCCCAACTGGCCAAACCAACAAGAAGTATATACACTAGTAGTAGACTACTAGTACTATACTGTACTATTGGAGTAGTACTAGGGCTAGTGCTAGCCGTATAGTATGAGATATTGAGATATGACAACATTTTTTTCTCCTGTGTTTTGGGCCTCTTTGGATCATTGCCCAAAAAAAATGGCATTCAAAAATCGTCACTCATTTGGTTTAGATAAGAAAAATTGGCATTGCCAAATTATTTAGCATCCTTTCTATGCCATTGCATTTGGCTTGGCTAAGATTGGTATCTGCACCAGTACTGTAAAAAAACAATAGTGGTCAAGCTCTATTTTTGTGTTTTTTATAAGTTAGTCTACGATATTTTCTAATATTATGTAATAGTCTAATATTTAAATAAGTATGAACAAAGCATAGGATGGCATTTTACAGCAACAGAGCCCAACTTTTGGGCCTTTTTTTTTGCCAGGATTCGAGACGTACGGCAGTGGCAGTGTGCAATGCAATCGCAGTTCGACACTCAAAAAGGCAAGGATGGCCACAAGCTTGGGAGATCATGCTACTGTAGCACAGCTACAGTAAGACGGCCTACAGGGAGGTATGATGAGTTTTTAAGACAATGTTGACTCCTCGGGAAATAACCAGCCTGTATGCCAGATTCATTCGCCCAATCACTGGATCTCATAATCCCAGGAAAAGACACAACAAGCAGGAATTCTGCAAGCAAAGGTCCAGACAGGTTTTGCCAATCGTTTGAGAGATGGAAGAATATCCAGTTCAGAATAACACCATCATTTCATTTTCCCCCCGACATCTCAAGCTGAATCATCATATCAGCATCATCGTACAACCAAAAGAAAGAAGAATCGTATAGAATACAACGAAATTCGTGTTTGACTGAGTTCAATGCCCCAGGTGAGGAAACAGCAAGCCAGCACCCATAATTCAGTTTTGCAGCACTGGATTTCACAGGTTTTGTATTGTTCACTGTAAATTGTATACAAGTGCTAGTCTTGAGGTCTTGCCTCTCTCGACAAATGTGGCTTCCGGTCATCATGTGACAGGCATGCAGCCCGCAAATGGGATTTCCAGTGTCAAAATGCCAGGAAGAGCAAGTGCTTACAATGCTTACAAGAAATGGGACTCACAAAAAAGTGAAATCAAGAAAAATGACAACAGCAACGCCTTCAGCTCCCTAATACCAGAGAAGTTAAAGAATCATAGGGATTTCAACTTTTTCTTCTTCGATGCTTTTTGGGACTTGGAATCTTTAGCAGCCTGCATCCCAGAATCGTTCATCAGTATTTTCCACCAAGCAAAAATATGTAAAACTAAAAATATTCAAACTATTTTCCACGGTATAGCTATGTGTGGCTGTGCTATTATGAACGGAGTATGTCCATCTGGTAAGCCAAGAAGGCAGTACTTAGACCCTGATTTTTACCAAGTAGACTATGCAATGACAGTAACCCAGAAGCTTAGTCTCCTGATTCTCCTCTTTCTTGTGAAGGAAAACTAGTAAAAGGGTATTACAGTATTATTACCTTTAGATTTTTCTTTTTATTTTTCTTCTTTTTCTTGCTCTGTTCTCCTTCGTTTTGAAAACTCTTATCCTTCTGAGCAATATGATATGACTGTCAGATACATGTCAAAAAA

>Zhuan 9

TGAATTTCTGAAATTCTGAACCTGACGTACGCAAGAATCAGCATCAAGTACCTGACGAAATGGTTGCTTGGCTGACACTTGTCCAGTGTGAGCTTTCCGTTGAACTGTCAATTGCTTCCCTCCTTTTTCCCAGCTTTTCTGTACTTGTTGCCCATGTCGTTCAGTTCCTCATCTTCTTCAATTTTCTTCTCCATTTCTCAATCCATTGTCAGTACTACATATGTGTGTACTTCTCGCGGCGCCATTCTTGTCATCTAATTGCAGGTTAGTTGTAAAATGTAAAATCGAATTGGACATTTTGAACCAGGTCATGGATTAATTGATTAAGATGCTAGAAGAAATTAACAAGCTGTGCCATGCAATATATCATGCATGCATGCATGAATATGATGGCTAAGTAGGTACTAATGCTAATATAGAAGAGAGAGAGAGAGAGAGAGAGAGAGAGAGAGAGAGAGAGAGAGAGAGAGAGATCATCTGCCTAAGTACATATTTGAAGAAGCTCTACTTAATTAACTAGAAATGGCGCCAAGCCACTCTTCTTGTTCGATCTACTGCTAGCTGCTGCTGCTGCTGCTGCTGCTATACTACTCGATCTCTTGCTCGATCGATCAAACGCAGATTGATCAAGATCAACTCGATCTGATCATGGTAGACAGGAAATGATATATGCATGATCGCTCAGAGGCAAAGTGCGTGATTAGCCATGCAATGCCCGGTGCAACTCGATCAATGGGAGAGGAAGCTGAATGGAGAGTAGGAGTCGGAGCCCTGCGACGAGGCGACCATGTCGGCGGCGCCGCCGCTCGCCGGGAACCCGCAGGCGCCGAGCTGGTCCGCCGCGTCGCCGCCGCCCCAGAAGCCGGCGACCATCTGCGCGAGGTCGTCGACGTCCTCCCGGAGCCCCATCATGCCGTAGGCGTCGGCGTCGGAGTAGCGCCGCATGTCCTGATGATCGGCCGCGGCGCCGCCGCCCCTCGGCCGGAGGCAGCTCTCCGGCACCACGCTGCTCAGGTACCCGGAGTTGTCGTCGGCGCCGGAGAAGAGGAAGTCGTGGCCGTTCCTGTCCATGTCCAGCAGCGACGACGACATGCTGGAGCGGTGGGGATCAACCGGGACCATCACCGGCATCGTCGAGCACTCGCCCACCGACGACGCGCCCGACGCCGCGCCATGTCCGTGGTGGTGGTGGTGGTGGTGGTGGTGACCGTACGAGCCAATGTGCGGCGCCGCGCCCACGCCGCCGCCGTACTGCACCGAGGACGGCGCGGCGGCGGCAGCGGCGTACTGCGGCGCGTGGAACGGCGCGAGGAACGGCGGGTAGTTGTAGGCGGCGTGGGTGTAGACGAAGTTGGTGCGCGCCTGGGCGCCCTTCATGGACAGCGCGGCGCGGTCGTACGCCAGCGCCGCCTCCTGCGCCGTGTCGAACGTGCCCAGCCAGTGCCGCTCCTTGGTGGTCGGGTCGCGTATCTCGGCAGCGTACCTCCCCCACGGCCGCCGCCGCACGCCGAGGAACCTCCCTGGCTCCTGCGCGCGCCGCCTGCTGCGCCCCGACGGCGGCCGCTCGCTCATCGGCGACGACGGCGGCGACGGCTGGCTCGCCGGCTTCGGCGGCTCCGAGAACGCCATCAGGCTGGCCTGGCTGCTGCTGCTGCTGCTGCTACTGCCGCTGCCTCGAGTGTTCATGACCAATGCAATATTGCAATATTGCAATGCAATGCAAGAGTGAGAGTGAGAGTGAGCTAGGCTTTAGCTAAGCTAAGGTATATGAATGAGCTCGAGCTAAGCTTAGCTTGTGTGTAGTGCTCAAATGGGAGGGATTCAAGGGTGGTATTTAAATGGGTCTTGGAGAGAGAGGTCACTGTGGATGAGATGGCAGAGAGGGGTGGCATGCATGCACTGCACTTGTGTTAGCTAGACCTATAGCTGCATCATATCAAGGTTAGTTTGTAAGTATTCATCTTGTTTTCCAATGTGAGGTTTGGATTTGTGTGCCCTAATTTAACCTTAGGACCAGTAGAGGGGAATGTTGTGTGCTACTAATGTTTGTGTGTGAGTGTGTTGCTTCAAAATTAAGAATGGTTGGAATGTTCTCCCCTTAGTTTTCATACACTTCATTTATGATGACAATGCATGCTAGCTCTCTACCACACATGTATGCAAAGTTATCATCCTATAGGTATAATATGGGGGTATGGCATACAACATATACAGTCCAACACCAGGCAGCATCTGAAAGTGCCACATTAATCAAGCTAGTGACCAAGAAGCCCCTGCCAAAGCAACTCTTTAAATTTTGCTGGTCCTACATATATTCTAATTGTGGTTTAATTAAGCTAGTTCTAATAATTTCTGCCTTAAGCTTGCATGGAGTCATGATTCACTCCTGAGTTAGACAGTATTACAAACTAATCAGATAATGAAAAGATGCCTGCCACTGGGTTAGGAAAAGGATCAGGGAAAGAAGAGAACATATGTAACCTAGTCATCCACCTTTTTAACAATTGTAATTTGTGTGCTCCAATAAATTTTAAAAAATGAAATCTTTGCTCCAAGATACTACTTCTATAGCTATATATTATGATACATGTCAAAATGCTACTACACACAATAATGCCCATTTTTTACAGGCCATATGGCTTTGCTTTCCTTCGTATCCATGTGCTTGCTTGCGCAATACATGCATGCATGCAAGTTAAAAAGATCAAACAAAAAAAAACCTTAAAGCTATACTTATATTTGCCTCATTGCATAAGCACTTAAGAAGCTTTCAAATGGAGTGGTTAGCTTGCCCTCAAAACTAGATGAACAACAGTGTGAAATGTGTAGAAGGGCACTCTTTCTCATGGCATTCCCTGTGTAATTTTTTTGGTATATTTCTTTTGGTTCCATTCATGCAACCTTGAGTGACACTCACATGAGGTGAGGGTCCAGTGGGTCTCCCCTTCTTTGACTCCTTTTCTCTAGTGAAGCTTTGCTTTGTTCATTTGCATGAGCTAGCTAGACAGATTAATTAAAATAAAATGCTTGTAACGATCATTATCCCTCACAATTCCCATTGAATTCTTGCCGATAATTTAATCACAATGGACATTCTATAGATTAGTGCGCATGTGCGTGCCGGTGTTAGGTTCAAATGAGAACAAATCGAAAGGAGTGATATTAAATCAGCAAAACAAGAGAACTATCCCTTTCATGTCTCTCTAGAGCCATTTTAATAAACCTAATAGATGCCTTTTTGGAGTCAAAAAGAAAGAGAGAGAGCTAGAGCTATAGCCAAACCGGAGAGAGACGAATTGAAGACGTCGTCGAGGTGGTAATGCATCCAATGTATATAGCAACATCAACTCGACCGACTGTTAAGTGTGTGCCATGTGAGGTTTAAGCAAAACAACAACTGAGGTGGATACTACTTTTCACCGGCCACCTGTCTAATTTCTCCTCCACATTAATTAATTAGCTGTTGTGTAATAGCATCTTGTAAAAGGCTTCAAATAGAGAACATCACATAATCTATACTATCTTCGTTTCAAGTTAATTATAAGACATTTTAGCATTGCACACATTCATATAGGTCTTAGAACCTGAAACGGATGAAGTATCAATCTAGTGGATATGCTGATTTTTTTATTTCTTATGAAAAAAATGTTTGCAATTGATTAATTAAGCATATATAATGCAGAGTGAAATTAGCACTGTTAATTCCTCTTGTTTGTTTAACTTTGGAGCATCTAGAAAAGGCTTTTCTTGGAGTGTACAAAGCCTTGACTTCCATCCCTCATGAGAACAATGAGAATTTGGATTCTTATGGAGAGCTGCATTTGGGGCAATTCTTGCATCTAATGCCTTAGCTTCCTACAAATGCAAGTATAGTACAATGAGAGGAGAGCTACATGTGTAGAGTGCATGCAGAGAGAGAGATCTTATCTGATGACCTTGACTTCCCCTACTACACCCCTCTCTTGTGTGTGAATTTGGCATATATGTGTTGGCCTGTGAAAATATTGCATTGCAAGATGGGGTCAGGTCAAGCCCTAGCTAGACATCTGAAAAGGTGTGAGGAGGAGAAGGTGGTGTTCAACTGGAGATGGGGAGAAAAAAGGAGAAATCTAAGGGCAAGGAGGCTCCACACAATGGCCTTGACAAGATGTACTAGAAATGCATAAGTTAGTTAATTTGCAGAGAGACCAGATTAAACTGATAATTATAATTATGATGGAAACGAGCACAGCACACAAGACACATGTTCTTGTCTATTCCTTAGGGTCACACCCGGGTTTTGGGGGTGGCCTTTGCACTACTTTGACTTTAGACCTCCCTTATAGAACCAACAAGTTTTGTGGAAAAGACACACACCCCAAAAAAATAATATGTATGCTAGGACAGTGTGGGTGTGGGTGTTTGTGTGTGTGTGTGTGTATGTGCAATTGTAGAAGTATGCAAGGCAGTTCACTAAACATAATCAAGGGAAAGGTAGAAAAAGACCACTTGGGGCATGCACATTTGTCTCACCAAGTTGTGGTTTGAATAAAAGGAGATCAGACAGAGTTTAGTAGTGAAAAGGTGCACTCACAATTCACAGAACAAAAGCTCCACATAGAACGCTTACTTTAATCATTTCGAATTTGAACTCTGATTTTCAATTGTTGATTCTATGCTAATTCCAAAAAACTTCCATATATTAGATATTTTGGTGGATATCATTCCAATTGTATTGGTACCTTAACAATTGTCAGTGCTTGCTACGAAAACTCTGTTTCTAGTTTTCAGATAATTGATGGCAATTAATTAGTACTGCATCAAGTTCAAATCTTCAGCTCGCAGATTGGACAAGGTTATTGTACTGGTCAAACAGTTCGATCTCACAGTGTTAGTGTTGCTGTTGTCTATGTGATTGATTACTAAGTTATTAATTAAACAAGCGACCAAGTACCAAGAGGAGAGTGCACTACAGCACACTTGTCCCATTTTATATCGACCACCAAAAATGACAAGCAATTACGCAACTGAAGATGATGATTTGGCACTGATCTAACGAATGAAAGATTGTTCCCACTCTTCAAGTTCCTATGATCCATGTTGATTGGTCTGATCATCCCCAATGGCATTGTCCTGCATTTGACTGAACAATGATTAACATAAGCATGCATGGTTTCTTGTTGTTAACTCTTTTGTTTACTTGGGATTGGCAGGTGGCAGGTGATGATCAGTGAAGCAGCATATGATATCTAAACTGAGAGTAGTAGTAGAAGAAGAAGAAGCTAGTACAGAGGAGTGTATGTGTTGGAGCTAAAACTGACAAGTACGAGACTACAGCTCCTTGCAAAAGGGGGCTCCTGACCATACATTGCTATAGGCTGGCTCTACACTCTACACACTACTACTGTCTACACATGCAATTATACACACAGAGATGAAATGCATCTTCGTCTCTCCCAGTCCCAGCTACTAGGCCACTTGTGCGAGCTTTGCCTACAAGGATGATCATGGATGCAGAGGCAGAGGCAGAGCACGCAGCAACCACTCCCTGGACCCTGCAGCAGCAGCCTGGGCAAGGCTATGTAGGTAGAAGAATGGAGATATGATGTGTGGTAGATATCTACATACTATATAATAGATATATATGTTTTTTTGGATTTAAGTAAGATACATGGTAGAAGTGTATGCCATGAGTGATTTTCAGGGGACATCGGTGTTGGTCGTTGTTGCTTAAGGAGAATGATGGTGACAAAAAATGTATGTTAGAGATCAAAGTCTTGGAGTTCTATTATAAAGCCCCGTTCGGTAGTGAGCTAGTAGTGGCAATGTTTTCCTTTTAGCATGTTTTCCAAACTGCTAACCGACTGCTAAGATTAGAAGCTTAATCAGTTGCTAAACAATTTGGTATGTGTTTTCTAAGGATTTGAGTTTAAGGACTCTTGTATGGATTTTTATTTGTTGATTTCTTAACTAATGTTGTTGGTTTAACTTAACTAGTTTTAAAAGAGGTATTTTACTGTTCTTAAGGTTGTGCAGTACCAAATGGCAAATCGTGACCGTTGATCTAGCATCATCCAACGGTCAAAAATCGTCCGTACCTCATTGAAGCGGTATCGTGGGTGAGAGGGTACGTCTGTACTTTCACGTGCGGCATCACTTTCTTTCGTGTTTCGCTTTCTTCTCTCTTTCACGATAGGAAAAAAATCGCCGGGGAAGAGCAGTGAGAGAAACTAGCCCTAAATCGCAGGGCTGGGGTGGCGAGAGGCAAGGGCAACGAGAGATGGTGGCGAGAGCACGGGCATGAAGGTCACGAATCCTAGATGGGGACATTCCCGGTGGTAGCCTCGATGCGACTGTAGTGTGGTGACCTCGATGTGCGATGGCGGCGCGGCGCAGACGGCCGGCACGGACGACCTGATGCGGTAGATGGAACAGAGGAGAAGAGAGTGGCACAGAGGATGTCGCTATTGGCTGAGTGGGCAGTGATTAGCAGCGGTATCTCATTTTCGTTAGCCCGATCATACCCCTGCTAAACCAACGGTTATATTATATTGATACCTCGTGTTACATTGTTCCCCGTAGATTCTTAAGGACGGGAAATATGATCGTTTAGAAAACATTGAAACACTTACACTGTAACATAAAACATATGGTTTCGTAAAAGAAAAAAAAAGTATATGCATGCCATTGGGATTGGTGAGATGATAAGGTAGAGGCAGTAAAAAAGAATGGAGACGGCTACGCCGACGCCGTGTACAAGGGAACAGTAGGTCGTGCGAGTGAGAGTGGCCTCCCCGTGGGACGACGTGTCGCCGCCGCATTGCCCCGCGGGACGCCAGCCAGCCACAGCCACAGAGCCGAGCCATACGGCCGCGGCGCGCACGAGAGACTTGTACACCGGCTACGGCGCCGACAACGCTAGCTACTATAGCGCGCGCTCTGGGCTGCCGCGCCGCGCCGGCCGCTCCCAGGACGTGGGCGCGCGCGTGCGCGTGCGCGTCCGTGCGTGCGTGCGCGTCCGTGCGTGCGTGCGTGACGGCGTCTGCGCGCGCGCCGCGCCGATCGATCGATCGTTCGGCTAGCTAGCTGTGGTAGCTGCCCTGCGCACGCACGCCGCGCGCGGGCTATGTATGCACCACCGGCGCAATGCACACCGCCGCGCGCGACCGGCCGGCGCCATACTCTCCCCCGGCGCGCCTCTCGCTTTGTACTCAACTACGACTTGCTTCTGGTGTCTTACTACGTAGGAGTACCTGTTTTCTTTTCTTTCTTTTTTACACAACATTTAACAACCCTAGCTACAACATTTTTTAATTTTCTCTCTTGTTACCATACAAAGCATCAATAATAAGGAATGGAAATGGTGATAGCTAGAAATTCTTGTTCTAAAAAGGAGAAATTATCGGCCAACTGAGCATTGTTTTCATATCGTTTTTGACCTTTTCCATTTCTCCCATATAGCATTTTTGTTTTTCTTTTCCAACGACATTTTGCAGTCGTTAATAAATAGTTAAATTGGTAAATATGAAAAAATTTTGACCGGTCAATAATCATTTTCATAATGTCTCTGACCATTTTTCATGTGTTAAAGATACAGCTATGAGCAGGTTTCAAAAAACGATCGGTTTTCACGAGAACCGCTTGGTTTTCGTGAAACTGCCCACGGTCAATTTAGGGTTACATATCAGTTTTAGGCTAGTTTCCGTAGTACATTGATTGAAAATCCCCGATTTTATCAGTTTTTGGGTAAACCGGTGAGAAGGGTTTTTTTATTTCCAAAACGAAAAGGTAAATCCCGGCCATGAGCGAGTGAAAGGCATGACACACACTACCAGGAAACAGACTTTCCCTCACGGCCTAAAACCGTCAGTATTAAGGATTTTCCGTCAGGAGTACTCTTCTCTGACGGGTAGCCGTCAgGACTGTACCGACAGGGGTAGACTGTCAGGAAAAGGTCATCTTTCGCGTCGGTCGCCTGTCACGGCTGTGATCCTGACGGCCCTTCGTGAATCCTGACGGTTAGTCCTGTCGGCTGTTCTGCCGTGCGAGGAGGGAATGCTCGGGTCGTCATACCGTCAAGGTTAGCCGTCAGGGATAAGTCCTGACGGTCTGCACCGACAGGACAGGAAAAAATAAACNNNNNNNNNNTTTTTCCCGGAACTGGATGGCGCCAACTTTGCTTTTCGTTCGCGCGTACTCCGTTTTTCTTGTCCCCACTGCAATGTGCCTGACGGGTTCGTGGCTCCGAGAGGATAGCGTGACTTTTTCGTGTCGTGAGTTTGCTTCCGTGAGGGTACGTCAATGTTTTCTGACGCACAGTTCAAGGCCGCCAGAATCAACTTCTGCCGTCAGGGGATGATGGTTTTCTGGTAGTGACACAGGTAGCTAGATAGCAATAGCATAGCAAGCAGCTCGAGTCACTACTCACTAGTAGACGACTACCAGTGTGTCACACACTCACACTAGTCTATATACATATAGCTGTCAAATGTATACATGTGATGGGTATAGCTAGCTCAGCTCTTGACCGACCGGGCATGCAGTCCAAGTGTCGTGCGTGTAGAGGATAAGAAGAGTCGAGATGATGTACACAGTACAGATGGATGGAACGGGGGTAGAAGGATAGGATGATATGTGTAGGAGTAGAGCACTGTTCACGCAAGCACATTGCTGATGATGATGATGATGCATGGTGTGGTCGTAGACGAGAGAGAGAGAGAGAGAGGCTAACTTCACTTGTTCTGCAGAGGAGGCGACGCGTCAGCTGCCTCTGCCAGCGCCCCCCGAAATGGTAACCAAGGATTGTGTTTGGTTTGCTTTGGTTGTGCCTTTTCCACCGGGGAAATGGTAACATCTCCTCATACTTCTCCTCCTCCCCAACTGGCCAAACCAACAAGAAGTATATACACTAGTAGTAGACTACTAGTACTATACTGTACTATTGGAGTAGTACTAGGGCTAGTGCTAGCCGTATAGTATGAGATATTGAGATATGACAACATTTTTTTCTCCTGTGTTTTGGGCCTCTTTGGATCATTGCCCAAAAAAAATGGCATTCAAAAATCGTCACTCATTTGGTTTAGATAAGAAAAATTGGCATTGCCAAATTATTTAGCATCCTTTCTATGCCATTGCATTTGGCTTGGCTAAGATTGGTATCTGCACCAGTACTGTAAAAAAACAATAGTGGTCAAGCTCTATTTTTGTGTTTTTTATAAGTTAGTCTACGATATTTTCTAATATTATGTAATAGTCTAATATTTAAATAAGTATGAACAAAGCATAGGATGGCATTTTACAGCAACAGAGCCCAACTTTTGGGCCTTTTTTTTTGCCAGGATTCGAGACGTACGGCAGTGGCAGTGTGCAATGCAATCGCAGTTCGACACTCAAAAAGGCAAGGATGGCCACAAGCTTGGGAGATCATGCTACTGTAGCACAGCTACAGTAAGACGGCCTACAGGGAGGTATGATGAGTTTTTAAGACAATGTTGACTCCTCGGGAAATAACCAGCCTGTATGCCAGATTCATTCGCCCAATCACTGGATCTCATAATCCCAGGAAAAGACACAACAAGCAGGAATTCTGCAAGCAAAGGTCCAGACAGGTTTTGCCAATCGTTTGAGAGATGGAAGAATATCCAGTTCAGAATAACACCATCATTTCATTTTCCCCCCGACATCTCAAGCTGAATCATCATATCAGCATCATCGTACAACCAAAAGAAAGAAGAATCGTATAGAATACAACGAAATTCGTGTTTGACTGAGTTCAATGCCCCAGGTGAGGAAACAGCAAGCCAGCACCCATAATTCAGTTTTGCAGCACTGGATTTCACAGGTTTTGTATTGTTCACTGTAAATTGTATACAAGTGCTAGTCTTGAGGTCTTGCCTCTCTCGACAAATGTGGCTTCCGGTCATCATGTGACAGGCATGCAGCCCGCAAATGGGATTTCCAGTGTCAAAATGCCAGGAAGAGCAAGTGCTTACAATGCTTACAAGAAATGGGACTCACAAAAAAGTGAAATCAAGAAAAATGACAACAGCAACGCCTTCAGCTCCCTAATACCAGAGAAGTTAAAGAATCATAGGGATTTCAACTTTTTCTTCTTCGATGCTTTTTGGGACTTGGAATCTTTAGCAGCCTGCATCCCAGAATCGTTCATCAGTATTTTCCACCAAGCAAAAATATGTAAAACTAAAAATATTCAAACTATTTTCCACGGTATAGCTATGTGTGGCTGTGCTATTATGAACGGAGTATGTCCATCTGGTAAGCCAAGAAGGCAGTACTTAGACCCTGATTTTTACCAAGTAGACTATGCAATGACAGTAACCCAGAAGCTTAGTCTCCTGATTCTCCTCTTTCTTGTGAAGGAAAACTAGTAAAAGGGTATTACAGTATTATTACCTTTAGATTTTTCTTTTTATTTTTCTTCTTTTTCTTGCTCTGTTCTCCTTCGTTTTGAAAACTCTTATCCTTCTGAGCAATATGATATGACTGTCAGATACATGTCAAAAAACTTTCGGCGTATGGTATATAAAAGCAGCAAAATTGAAACAATTCACAGACATTCTCAAGTGAATGTTCATATACTTGCCTTATTC
